# Supplementary material for: Identification of Gastric Cancer-Related Circular RNA through Microarray Analysis and Bioinformatics Analysis
Source: Biomed Res Int. 2018 Mar 18;2018:2381680. doi: 10.1155/2018/2381680 (PMC5878900; doi:10.1155/2018/2381680)
Supplement: Supplementary Materials — Table S1: differentially expressed circRNAs between tumor and normal tissues. Table S2: differentially expressed miRNAs between tumor and normal tissues. [file 2381680.f1.zip]

Archive with 3 entries (2 files):
- New folder/
- New folder/Table S1.xlsx
- New folder/Table S2.xlsx
