# Supplementary material for: Identification of Gastric Cancer-Related Circular RNA through Microarray Analysis and Bioinformatics Analysis
Source: Biomed Res Int. 2018 Mar 18;2018:2381680. doi: 10.1155/2018/2381680 (PMC5878900; doi:10.1155/2018/2381680)
Supplement: Supplementary Materials — Table S1: differentially expressed circRNAs between tumor and normal tissues. Table S2: differentially expressed miRNAs between tumor and normal tissues. [file 2381680.f1.zip › New folder/Table S1.xlsx]

## Sheet: Sheet1
tumor_vs_normal 2.0 fold up regulated CircRNAs
	P-value	Fold change and Regulation		Annotations								Group--Raw Intensity		Group--Normalized Intensity		Raw Intensity												Normalized Intensity												miRNA Binding Sites
probeID	P-value	FC (abs)	Regulation	circRNA	chrom	strand	txStart	txEnd	best_transcript	GeneSymbol	Sequence	group-tumor(raw)	group-normal(raw)	group-tumor(normalized)	group-normal(normalized)	[tumor1, tumor](raw)	[tumor2, tumor](raw)	[tumor3, tumor](raw)	[tumor4, tumor](raw)	[tumor5, tumor](raw)	[tumor6, tumor](raw)	[normal1, normal](raw)	[normal2, normal](raw)	[normal3, normal](raw)	[normal4, normal](raw)	[normal5, normal](raw)	[normal6, normal](raw)	[tumor1, tumor](normalized)	[tumor2, tumor](normalized)	[tumor3, tumor](normalized)	[tumor4, tumor](normalized)	[tumor5, tumor](normalized)	[tumor6, tumor](normalized)	[normal1, normal](normalized)	[normal2, normal](normalized)	[normal3, normal](normalized)	[normal4, normal](normalized)	[normal5, normal](normalized)	[normal6, normal](normalized)	MRE1	MRE2	MRE3	MRE4	MRE5
ASCRP003318	0.00176226	2.01389	up	hsa_circRNA_103012	chr20	+	30142548	30149539	uc002wwc.3	HM13	AAGCATGCTCAGTGGTGTTTCCCCAGGATCTGCTGGAGAAAGGCCT	1984.67	738.667	10.4741	9.46413	1465	2749	2233	1859	2057	1545	889	901	756	737	540	609	10.017	11.1514	10.7936	10.4781	10.4315	9.97316	9.79975	9.90331	9.51241	9.48591	8.92345	9.15997	hsa-miR-320a	hsa-miR-320b	hsa-miR-320c	hsa-miR-338-3p	hsa-miR-138-5p
ASCRP002722	3.28977e-05	2.06035	up	hsa_circRNA_102403	chr19	+	1417498	1432689	uc002lsm.3	DAZAP1	ACTTCCCCTATGGTCAGTATGGAAGCTCTTCGTGGGCGGTCTTGAC	1806.67	685.333	10.35	9.30711	2022	1458	1855	1794	1950	1761	691	547	947	631	662	634	10.5996	10.0748	10.4715	10.414	10.316	10.224	9.32764	8.9606	9.88283	9.21886	9.2375	9.21523	hsa-miR-671-5p	hsa-miR-663a	hsa-miR-608	hsa-miR-92a-2-5p	hsa-miR-502-5p
ASCRP002314	0.000773389	4.49906	up	hsa_circRNA_101974	chr17	+	7478436	7478576	uc002gho.2	EIF4A1	GGCTCAGCAGGTTATGATGTGATTGCTCAAGCCCAATCTGGGACTG	986.667	302	9.1658	6.99618	1006	1081	969	992	934	938	248	235	231	250	236	612	9.04723	9.42521	9.27757	9.15766	9.07112	9.01599	6.50578	6.77641	6.39729	7.00701	6.12409	9.16647	hsa-miR-622	hsa-miR-661	hsa-miR-876-3p	hsa-miR-516a-5p
ASCRP000018	0	5.28414	up	hsa_circRNA_000167	chr14	-	20811404	20811554			TCCGCGCGAGCTCATCAGTGGGGCCACGAGCTGAGTGCGTCCTGTC	3402.67	571.5	11.4252	9.02355	3102	3460	3447	3396	3487	3524	598	534	536	590	616	555	11.2874	11.5383	11.502	11.4244	11.3747	11.4244	9.04723	8.90601	8.94446	9.09176	9.12982	9.02202	hsa-miR-330-5p	hsa-miR-328-3p	hsa-miR-127-5p	hsa-miR-326	hsa-miR-1296-5p
ASCRP001662	5.027e-08	2.41333	up	hsa_circRNA_101303	chr13	+	113963957	113964177	uc001vtm.1	LAMP1	AGCTCCAAAGAACATGACCTTTGACCTGCCATCAGATGCCACAGTG	1372.17	454.167	9.86009	8.58907	1318	1345	1417	1444	1314	1395	439	424	494	421	481	466	9.80399	9.93522	9.96908	10.0375	9.6311	9.78368	8.42573	8.45309	8.78912	8.47454	8.71553	8.67639	hsa-miR-29b-3p	hsa-miR-556-5p	hsa-miR-335-5p	hsa-miR-29c-3p	hsa-miR-1323
ASCRP001625	0.00323972	2.34682	up	hsa_circRNA_101263	chr13	-	49075877	49077050	uc010acv.1	RCBTB2	AAAGTCCTTCTCAAGATTCGGATTATCGAGATTGCAGCCTGTCACT	2031.33	646.833	10.4498	9.21909	2342	3418	1999	1814	1245	1370	785	694	672	507	724	499	10.8341	11.502	10.6267	10.438	9.54101	9.75704	9.54649	9.42521	9.29548	8.84339	9.38289	8.8211	hsa-miR-675-5p	hsa-miR-512-5p	hsa-miR-193b-3p	hsa-miR-494-5p	hsa-miR-642a-5p
ASCRP001790	4.05077e-05	2.50955	up	hsa_circRNA_101431	chr14	-	93760203	93761283	uc001ybo.3	BTBD7	AATTTAACATGCTTGCACAAGGGACCTCATCCTATTCTCAGCAAGG	1960.83	622.167	10.4742	9.14681	1428	1952	2219	2256	1604	2306	657	498	660	584	752	582	9.95195	10.604	10.7877	10.8127	9.95116	10.7378	9.2245	8.76914	9.27136	9.07514	9.43732	9.10339	hsa-miR-148a-3p	hsa-miR-454-3p	hsa-miR-103a-2-5p	hsa-miR-489-3p	hsa-miR-29a-5p
ASCRP002305	1.05054e-05	2.99559	up	hsa_circRNA_101965	chr17	-	5364258	5365866	uc002gca.3	DHX33	GATCCACCAGGTTGGCTATACAGTGCGCTTTGATGATGTCACCTCA	672.333	248.833	8.26007	6.67723	771	668	652	675	658	610	289	207	265	244	254	234	8.34484	8.21127	8.4659	8.26658	8.36267	7.90913	7.17532	6.06695	7.08833	6.87598	6.48177	6.37501	hsa-miR-519d-5p	hsa-miR-489-3p	hsa-miR-376c-5p	hsa-miR-376b-5p	hsa-miR-298
ASCRP000017	7.394e-08	5.75219	up	hsa_circRNA_000166	chr14	-	20811282	20811436			CGAAGTGAGTTCAATGGCTGAGGTGAGGTGAGTTCCCAGAGAACGG	9589.5	1410.83	12.987	10.4629	10724	11468	10810	9453	7116	7966	1745	1610	1612	1156	1342	1000	13.1424	13.2788	13.2233	13.0751	12.5077	12.6949	10.7763	10.7248	10.6959	10.1941	10.3756	10.0107	hsa-miR-615-5p	hsa-miR-663a	hsa-miR-296-5p	hsa-miR-345-3p	hsa-miR-622
ASCRP000748	1.6001e-07	3.67318	up	hsa_circRNA_100363	chr1	-	156290629	156304709	uc001fol.2	CCT3	AAGAGTGGAAAAGACTATTGCAGATATCATCCGAACATGTTTGGGA	739.167	243	8.48257	6.60554	789	783	778	721	722	642	257	229	253	239	250	230	8.403	8.56621	8.89746	8.43149	8.55218	8.04507	6.66531	6.65878	6.86932	6.77257	6.4044	6.26285	hsa-miR-181a-2-3p	hsa-miR-378a-3p	hsa-miR-422a	hsa-miR-378d	hsa-miR-342-5p
ASCRP001015	2.1724e-05	2.16496	up	hsa_circRNA_100641	chr10	-	89536077	89544427	uc009xth.1	ATAD1	CAGCTGCCAGGTGTTCTTCTCTATGGGCCTCCAGGCTGTGGTAAAA	3787.17	1423.5	11.5944	10.4801	4119	3436	3880	3854	3496	3938	1423	1669	1131	1818	1086	1414	11.7205	11.5124	11.6682	11.6898	11.379	11.5966	10.5078	10.7695	10.1494	10.9044	10.0213	10.5281	hsa-miR-182-5p	hsa-miR-424-5p	hsa-miR-103a-2-5p	hsa-miR-16-5p	hsa-miR-889-5p
ASCRP001182	6.74287e-06	2.30872	up	hsa_circRNA_100808	chr11	-	46529740	46534363	uc001ncu.1	AMBRA1	TTGAGGACTTTGAGAGGCTGCTGGAATCTTCCCTCATTTCATTATC	2484.67	852.833	10.9024	9.69529	2595	2299	2137	2752	2156	2969	758	649	941	908	911	950	10.9895	10.8796	10.7353	11.1196	10.53	11.1602	9.46913	9.30063	9.87274	9.83467	9.77801	9.91656	hsa-miR-330-5p	hsa-miR-326	hsa-miR-139-3p	hsa-miR-765	hsa-miR-410-5p
ASCRP001292	2.5e-09	2.57416	up	hsa_circRNA_100919	chr11	-	85707868	85712201	uc001pbo.1	PICALM	ACATGGGGAGGGCAACTACACTTTCCAATGCAGTGTCTTCCCTGGC	2435.67	760.667	10.888	9.52392	2576	2208	2295	2625	2511	2399	700	681	751	753	862	817	10.9849	10.8302	10.8365	11.0286	10.8353	10.8127	9.34789	9.39491	9.50291	9.52918	9.66437	9.70426	hsa-miR-636	hsa-miR-370-3p	hsa-miR-525-3p	hsa-miR-197-5p	hsa-miR-660-3p
ASCRP005356	5e-11	3.85326	up	hsa_circRNA_400062	chr20	-	32677771	32678011			TTTAAGAAGGTTGGCATGTCTGTCAACATGTTTGAGTGGCTCTCCT	5027.83	1081.33	12.0358	10.0897	5085	4644	4894	5396	4954	5194	1092	890	1103	1121	1166	1116	12.0659	12.0107	11.9824	12.1822	11.8598	12.1138	10.1094	9.85817	10.1043	10.156	10.1348	10.1756	hsa-miR-526a	hsa-miR-518f-5p	hsa-miR-520c-5p	hsa-miR-518d-5p	hsa-miR-522-5p
ASCRP003874	1.8292e-07	2.95851	up	hsa_circRNA_103578	chr4	-	905460	907456	uc003gbo.2	GAK	CTCTGTAAAGGAGGGTTTGCATTTGTGTATGAAGCTCAAGATGTGG	685.167	249.667	8.3177	6.75283	701	734	708	678	637	653	256	234	240	255	255	258	8.12066	8.44207	8.66991	8.27941	8.30472	8.08944	6.64443	6.75542	6.61652	7.0945	6.50578	6.90034	hsa-miR-149-5p	hsa-miR-650	hsa-miR-548a-3p	hsa-miR-148b-5p	hsa-miR-589-3p
ASCRP004318	0.000404313	2.15676	up	hsa_circRNA_104044	chr6	-	1726649	1742820	uc003mtq.3	GMDS	AACTGAAGTGGCTATGTGGTTGATGTTGCAGAATGATGAGCCGGAG	1744.17	644.667	10.3014	9.19251	1645	1955	1980	1603	1662	1620	748	877	644	659	459	481	10.2762	10.607	10.6081	10.2419	10.0261	10.0489	9.4549	9.828	9.23192	9.29643	8.6064	8.73738	hsa-miR-188-3p	hsa-miR-335-3p	hsa-miR-580-5p	hsa-miR-659-5p	hsa-miR-139-5p
ASCRP004032	0.00881415	2.41849	up	hsa_circRNA_103741	chr4	-	139981477	139994721	uc003ihm.1	ELF2	AGCAACAGCAGCTCCAAGTGGAAGCATCAGTTCACAGCAGTAATGC	986	370.667	9.14543	7.87133	851	1252	849	1242	725	997	344	541	312	450	262	315	8.61148	9.7789	9.05154	9.67169	8.55921	9.19977	7.76015	8.94141	7.64715	8.60516	6.64443	7.62965	hsa-miR-335-3p	hsa-miR-29b-1-5p	hsa-miR-29b-2-5p	hsa-miR-432-5p	hsa-miR-9-5p
ASCRP004376	7.06099e-05	2.48842	up	hsa_circRNA_104103	chr6	+	38050167	38084515	uc003onx.3	ZFAND3	TGTCGCTGCGGTGGGCCATGCACAGACACAGCTCATGTCTCATTAA	1483.5	485	9.97976	8.66453	1244	1719	1351	1528	1334	1725	448	641	414	532	387	488	9.66918	10.3693	9.87543	10.1428	9.64948	10.1724	8.46539	9.27496	8.37449	8.92221	8.18445	8.76569	hsa-miR-29b-1-5p	hsa-miR-1271-5p	hsa-miR-96-5p	hsa-miR-369-5p	hsa-miR-140-3p
ASCRP001111	1.2211e-06	2.24494	up	hsa_circRNA_100737	chr11	-	1307231	1317024	uc001ltd.3	TOLLIP	TGTGCCCATCACAGGTGTACATCGGTGAGCTCCCGCAGGACTTCCT	10252.2	3624.33	13.1156	11.9489	6808	11382	9944	10693	11074	11612	3521	3622	3516	3800	3635	3652	12.5928	13.2578	13.1153	13.2578	13.1486	13.3214	11.8922	11.8407	11.9315	12.0282	11.9728	12.0282	hsa-miR-661	hsa-miR-1301-3p	hsa-miR-608	hsa-miR-138-5p	hsa-miR-874-3p
ASCRP000031	9.048e-08	4.13141	up	hsa_circRNA_000300	chr2	-	31215302	31215470			CCTGGGGCAGGGGTGGCCTCTTTCACTTTAACCTGCTCCTCACCTT	7233.5	1422.17	12.5603	10.5137	11121	7749	6106	6335	6800	5290	1589	1453	1297	1433	1385	1376	13.18	12.754	12.4155	12.4376	12.4071	12.1679	10.6673	10.5816	10.4018	10.4984	10.4456	10.4876	hsa-miR-142-3p	hsa-miR-212-5p	hsa-miR-224-3p	hsa-miR-512-5p	hsa-miR-599
ASCRP005070	2.2684e-07	3.02215	up	hsa_circRNA_104821	chr9	+	96233422	96261168	uc004atx.3	FAM120A	TTTCATCCACCACATTACTTAGGTTGCACAGAGCATTGAGGATCAC	1253.83	374.5	9.67698	8.08141	1275	1313	1260	1252	1231	1192	367	454	378	365	351	332	9.72742	9.86205	9.72997	9.69298	9.51971	9.52975	7.93883	8.59913	8.14103	8.13805	7.85148	7.8199	hsa-miR-409-3p	hsa-miR-153-3p	hsa-miR-145-5p	hsa-miR-9-5p	hsa-miR-152-3p
ASCRP005065	8.83935e-06	2.52062	up	hsa_circRNA_104816	chr9	-	95018961	95048121	uc004ars.1	IARS	GAAATGGCAGGTGGGTCTTCAAACAACTCTATGATAAAGGCCTTGT	1022.5	344.833	9.19337	7.85959	1042	978	1134	990	1127	864	388	370	351	333	305	322	9.17835	9.12788	9.52217	9.14805	9.38774	8.79603	8.08125	8.14868	7.97369	7.91836	7.30794	7.72763	hsa-miR-561-5p	hsa-miR-140-3p	hsa-miR-122-5p	hsa-miR-505-3p	hsa-miR-612
ASCRP004319	2.58566e-06	2.2544	up	hsa_circRNA_104045	chr6	-	2116004	2124965	uc003mtq.3	GMDS	CCACGTCAAAGATGGTTCCTACCTGGCTGAGTTCCTGCTGGAGAAA	1758.67	612.333	10.3033	9.13054	1410	1592	1882	1702	1958	2008	574	526	633	740	580	621	9.92561	10.238	10.5078	10.3383	10.3334	10.4765	8.98097	8.87856	9.20579	9.4966	9.03376	9.18755	hsa-miR-891b	hsa-miR-100-5p	hsa-miR-99b-5p	hsa-miR-764	hsa-miR-301a-3p
ASCRP001985	1.41495e-05	2.88701	up	hsa_circRNA_101636	chr15	-	88726648	88727530	uc002bme.2	NTRK3	ATTTGCGTTATATACACATAGAGAACTGGCGCAGTCTTCACACGCT	606.667	238.833	7.97163	6.44205	650	611	566	680	536	597	257	206	222	211	287	250	7.93614	7.97464	8.02213	8.28269	7.75181	7.86237	6.66531	6.02971	6.16571	5.98485	7.06472	6.74201	hsa-miR-208a-5p	hsa-miR-146a-3p	hsa-miR-330-5p	hsa-miR-326	hsa-miR-182-5p
ASCRP002932	6.23186e-05	2.29939	up	hsa_circRNA_102619	chr2	-	10784445	10808849	uc002rap.2	NOL10	CCCAAGATGGGCATCTATTACATTCCATTCTGAAGTTTATAGGTTA	671.667	265.167	8.22594	7.02469	681	581	684	574	804	706	258	251	274	267	272	269	8.0487	7.84103	8.59307	7.85174	8.7639	8.25718	6.68531	7.08346	7.22358	7.2613	6.82706	7.06742	hsa-miR-452-5p	hsa-miR-874-3p	hsa-miR-218-1-3p	hsa-miR-767-5p	hsa-miR-218-2-3p
ASCRP004636	0.00146422	5.01361	up	hsa_circRNA_104374	chr7	-	50737418	50773020	uc010kzb.2	GRB10	GCCGCCGCAAAGCAGATATTCTGGAGGAAGGTGTGAACGCAACTTT	1743.5	387.167	10.1795	7.85363	1953	2665	1740	1335	1816	952	667	405	415	284	332	220	10.5576	11.1016	10.3414	9.8449	10.1756	9.05584	9.27272	8.3665	8.38009	7.46657	7.64535	5.99054	hsa-miR-328-5p	hsa-miR-30b-3p	hsa-miR-485-5p	hsa-miR-660-3p	hsa-miR-450a-2-3p
ASCRP004958	8.387e-08	2.42193	up	hsa_circRNA_104706	chr8	-	141828375	141900868	uc003yvs.3	PTK2	GGGCTGCAATAATATGACAGATACCTAGCATCTAGCAAAATAATGG	909.5	321.5	8.96188	7.68572	961	967	898	957	826	848	336	320	322	322	310	319	8.904	9.08425	9.13901	9.07737	8.82535	8.74132	7.6862	7.78708	7.7347	7.84155	7.38009	7.68474	hsa-miR-301a-5p	hsa-miR-545-5p	hsa-miR-182-5p	hsa-miR-125a-3p	hsa-miR-570-5p
ASCRP005350	5.103e-08	3.49195	up	hsa_circRNA_400056	chr2	-	130914268	130914588			GCAGCAGGTGTCTTGCATCTCATATTCTTCAACCCTGTCAGAAGAG	4770.33	1110	11.9331	10.1291	5060	5008	5024	4503	5307	3720	1288	1109	1231	1073	1072	887	12.0585	12.1138	12.0107	11.9587	11.9548	11.502	10.3595	10.1905	10.3368	10.0901	9.99982	9.79759	hsa-miR-767-3p	hsa-miR-654-5p	hsa-miR-329-3p	hsa-miR-362-3p	hsa-miR-296-3p
ASCRP003140	0.000500255	2.36913	up	hsa_circRNA_102831	chr2	-	148730307	148733544	uc010zbr.2	ORC4	GGATCAGGAAAAACTATGGATTTGAATTTGTTGAAATGAGCAGTCG	659.833	264.333	8.18337	6.93901	711	790	619	695	553	591	273	287	263	284	250	229	8.15333	8.58057	8.32192	8.34595	7.85901	7.83946	6.95078	7.51766	7.05074	7.46657	6.4044	6.24394	hsa-miR-506-3p	hsa-miR-124-3p	hsa-miR-488-3p	hsa-miR-646	hsa-miR-605-3p
ASCRP001360	0.000542039	2.26545	up	hsa_circRNA_100989	chr11	+	128628009	128651918	uc009zci.3	FLI1	TCACGATTGAGTGTCAAAGAAGGAGGCTCTGTCGGTGGTGAGCGAC	1122.5	403.667	9.40924	8.22945	1131	943	1120	1159	1226	1156	317	335	364	481	387	538	9.44398	9.00901	9.49984	9.52413	9.5115	9.46701	7.49351	7.9196	8.0681	8.73696	8.18445	8.97405	hsa-miR-30b-3p	hsa-miR-889-5p	hsa-miR-766-3p	hsa-miR-509-3p	hsa-miR-608
ASCRP002215	0.00011956	2.90294	up	hsa_circRNA_101873	chr16	-	74491771	74493687	uc002fcw.4	GLG1	CGCGGGCGTCATCTCCAGTCTATGTGCTGAAGAAGCAGCAGCCCAA	7411.83	2128.5	12.5896	11.052	8934	9507	8449	6026	6573	4982	3020	2886	2164	1867	1399	1435	12.9201	13.0328	12.8342	12.3458	12.3458	12.0585	11.6194	11.522	11.1866	10.9566	10.4601	10.5675	hsa-miR-632	hsa-miR-483-3p	hsa-miR-889-5p	hsa-miR-380-5p	hsa-miR-214-5p
ASCRP002793	0.00105598	2.00638	up	hsa_circRNA_102476	chr19	+	17270204	17273932	uc002nfj.1	MYO9B	GCTGGAGCAGGTGAAGCGAGAAATCTTGGTGGAGGTTCTGACCAAA	6132.5	2466.83	12.3565	11.3519	4812	5024	7003	5291	8705	5960	2234	1473	2632	2435	3396	2631	12.018	12.1412	12.6803	12.1501	12.8127	12.3368	11.1705	10.604	11.4967	11.39	11.8855	11.5646	hsa-miR-767-3p	hsa-miR-877-3p	hsa-miR-573	hsa-miR-1301-3p	hsa-miR-34c-5p
ASCRP004956	0.000269048	2.13466	up	hsa_circRNA_104704	chr8	-	141799572	141900868	uc003yvs.3	PTK2	TCTGTGTCAGAATATGACAGATACCTAGCATCTAGCAAAATAATGG	680	279	8.29292	7.19891	625	686	712	753	659	645	273	271	287	293	257	293	7.8305	8.28096	8.68035	8.54028	8.36631	8.05911	6.95078	7.33575	7.37611	7.57427	6.55392	7.40264	hsa-miR-301a-5p	hsa-miR-545-5p	hsa-miR-182-5p	hsa-miR-200b-3p	hsa-miR-125a-3p
ASCRP000770	0.000966376	2.01208	up	hsa_circRNA_100385	chr1	+	170688866	170695542	uc001ghe.3	PRRX1	GGACAGCGTCTCCGTACAGATGACCAGCTGAACTCAGAAGAAAAAA	1007.67	405.333	9.22857	8.21988	1055	1087	920	1140	864	980	403	516	380	453	314	366	9.20447	9.44398	9.18683	9.49143	8.904	9.14072	8.18094	8.84221	8.15375	8.62525	7.42485	8.09231	hsa-miR-193a-5p	hsa-miR-1301-3p	hsa-miR-494-5p	hsa-miR-135b-5p	hsa-miR-361-3p
ASCRP001125	0.0249253	2.59872	up	hsa_circRNA_100751	chr11	+	4076755	4080626	uc001lyv.2	STIM1	CCTCCTCTCTTATACAATTGGACCGTGGATGAGGTGGTACAGTGGC	7159.5	2478.5	12.3943	11.0165	8842	13764	6547	6367	3749	3688	4730	4795	1724	1350	1119	1153	12.9049	13.4876	12.5447	12.4551	11.4854	11.4879	12.2794	12.2794	10.7952	10.4278	10.0843	10.2326	hsa-miR-1301-3p	hsa-miR-215-3p	hsa-miR-493-3p	hsa-miR-608	hsa-miR-670-3p
ASCRP002094	0.0305159	2.06507	up	hsa_circRNA_101748	chr16	+	19656207	19663412	uc002dgn.2	C16orf62	CTCTCCCAAGTGCACTCACTCTTGAGGATGAGAAAAGAATGCTGTC	42053.8	17065.3	15.0802	14.034	50848	56245	35400	48357	30646	30827	22475	31026	8662	20951	5507	13771	15.2935	15.5053	14.8624	15.351	14.6609	14.8079	14.477	15.0668	13.214	14.6386	12.541	14.2666	hsa-miR-1301-3p	hsa-miR-422a	hsa-miR-378a-3p	hsa-miR-602	hsa-miR-378d
ASCRP004787	0.00060779	8.36037	up	hsa_circRNA_104533	chr7	+	155471301	155473602	uc003wme.3	RBM33	CCTTTAGATGAATTTACAAATCAGTCGGATTTGTCAGATGAAGAGC	695	211.833	8.3507	5.28713	702	727	697	724	670	650	247	204	212	210	205	193	8.12433	8.41274	8.64099	8.43653	8.40815	8.08147	6.48177	5.95319	5.84941	5.94443	5.17208	2.32193	hsa-miR-578	hsa-miR-125b-5p	hsa-miR-26b-3p	hsa-miR-512-5p	hsa-miR-335-3p
ASCRP003550	8.04542e-06	2.72872	up	hsa_circRNA_103252	chr22	+	46096161	46125470	uc003bgn.2	ATXN10	GGAGCCTCCTGATGATGAGCTTTTCGCTGTGGCCTGCAGTTTTTAG	7721.5	2184.83	12.6403	11.192	9956	5223	8258	5382	9180	8330	2476	1813	2162	2121	2159	2378	13.0645	12.1679	12.8063	12.1679	12.8715	12.7635	11.3461	10.8617	11.1807	11.1807	11.1768	11.4062	hsa-miR-204-3p	hsa-miR-501-3p	hsa-miR-502-3p	hsa-miR-18b-5p	hsa-miR-640
ASCRP004920	7.95e-08	4.43013	up	hsa_circRNA_104667	chr8	-	101936182	101937267	uc010mbq.2	YWHAZ	CAACTTGACATCTCTTTTGGAAAAGTTCTTGATCCCCAATGCTTCA	1083.5	282.167	9.39217	7.24482	1152	1073	1044	1197	995	1040	257	258	292	274	339	273	9.49752	9.39758	9.3899	9.59533	9.18683	9.28588	6.66531	7.17823	7.43739	7.3557	7.71252	7.11979	hsa-miR-216a-5p	hsa-miR-511-5p	hsa-miR-626	hsa-miR-134-5p	hsa-miR-758-3p
ASCRP000749	1.2647e-07	4.46582	up	hsa_circRNA_100364	chr1	-	156303337	156304709	uc001fol.2	CCT3	GACCACATCAGTAATTATTCTTGACTATTGCAGATATCATCCGAAC	1249.83	307	9.66568	7.50675	1394	1313	1140	1220	1283	1149	301	344	338	288	302	269	9.91426	9.86205	9.53406	9.63617	9.58973	9.4578	7.32191	7.98084	7.87676	7.52485	7.26872	7.06742	hsa-miR-378a-3p	hsa-miR-422a	hsa-miR-378d	hsa-miR-877-3p	hsa-miR-133b
ASCRP004102	2.7687e-07	2.2371	up	hsa_circRNA_103812	chr5	-	37301538	37303516	uc003jkt.1	NUP155	TGGACATAACTAAGGTTGCTTCTCCATTTCTGGAGCCACATCTAGT	1427.5	496.667	9.9173	8.75567	1489	1295	1449	1332	1493	1507	550	450	526	500	538	416	10.0577	9.82608	10.0229	9.83322	9.84176	9.92215	8.91026	8.5801	8.89645	8.81924	8.91948	8.4085	hsa-miR-200b-3p	hsa-miR-429	hsa-miR-200c-3p	hsa-miR-573	hsa-miR-539-5p
ASCRP004441	5.53076e-06	6.05627	up	hsa_circRNA_104168	chr6	-	107031202	107050797	uc003prk.3	RTN4IP1	ATGACATTGCAGAACTGGTGGATGCGGGAAAGTGTTCTAATCTTAG	3526.83	542.667	11.4338	8.83538	3211	5419	3644	3023	3290	2574	760	679	445	534	354	484	11.3235	12.22	11.5856	11.2766	11.2661	10.931	9.47843	9.39267	8.57096	8.93319	7.88772	8.74931	hsa-miR-450b-5p	hsa-miR-139-5p	hsa-miR-224-5p	hsa-miR-193a-3p	hsa-miR-193b-3p
ASCRP002743	2.2569e-05	2.84136	up	hsa_circRNA_102424	chr19	+	5039846	5047680	uc002mbq.4	KDM4B	TTTGGGGAGCCTAAGTCCTGATCATCCCCCCGAAGGAGTGGAAGCC	4491	1279	11.8114	10.3048	3521	5774	5279	3649	5078	3645	1575	1685	1058	1262	1088	1006	11.4854	12.3142	12.1412	11.5724	11.8922	11.4629	10.6446	10.7903	10.0402	10.3131	10.0229	10.0177	hsa-miR-197-3p	hsa-miR-487a-3p	hsa-miR-524-5p	hsa-miR-154-3p	hsa-miR-323a-5p
ASCRP000746	0.000550908	2.25903	up	hsa_circRNA_100361	chr1	-	155896466	155896947	uc009wrl.1	KIAA0907	CCAGTCAGGGGGATCGTCCATTATATCTTCATGTTCAGGGCCAGAC	569	248.167	7.82767	6.65197	546	579	581	555	610	543	262	237	252	234	294	210	7.44189	7.8305	8.11893	7.75682	8.18094	7.63691	6.74313	6.82706	6.8486	6.65878	7.15269	5.68154	hsa-miR-136-5p	hsa-miR-187-3p	hsa-miR-549a	hsa-miR-32-5p	hsa-miR-367-5p
ASCRP000535	4.36e-09	3.6829	up	hsa_circRNA_100146	chr1	+	32691771	32692131	uc001bur.4	EIF3I	TAGTGCCAAGGAAAGCAGCTGGCCCTTCTCAAGACCAATTCGGCTG	17945.7	3787.83	13.8851	12.0043	13728	18570	17802	17652	19859	20063	3684	3744	3662	4325	3922	3390	13.5514	13.7926	13.8396	13.9106	14.078	14.1384	11.9477	11.8787	11.9728	12.2117	12.1067	11.9081	hsa-miR-744-3p	hsa-miR-616-3p	hsa-miR-361-3p	hsa-miR-615-5p	hsa-miR-135b-3p
ASCRP003890	0.0139147	2.43412	up	hsa_circRNA_103595	chr4	+	6599924	6602483	uc003gje.1	MAN2B2	GCCCTCGCAGGTCCAGCACCATGATGCCATCACTGGGACTGAGTCC	2478	867.5	10.8122	9.5288	2270	3988	2216	2780	1728	1886	854	1629	527	1033	390	772	10.789	11.7156	10.7862	11.1448	10.0857	10.3518	9.71503	10.7411	8.90174	10.0261	8.20028	9.58848	hsa-miR-185-3p	hsa-miR-324-5p	hsa-miR-15a-3p	hsa-miR-508-5p	hsa-miR-762
ASCRP001873	0.000778855	2.38017	up	hsa_circRNA_101522	chr15	-	51743841	51747425	uc002abd.3	DMXL2	ACACATTAATATCACCCGGAAACAGCCTCATTCATGTGTGGTGTTG	1697.5	575.667	10.1946	8.94356	1260	1583	1276	1973	1946	2147	498	375	504	539	840	698	9.6953	10.2232	9.75273	10.5848	10.3105	10.6012	8.69769	8.17886	8.82588	8.95625	9.60679	9.39589	hsa-miR-224-5p	hsa-miR-616-3p	hsa-miR-520g-5p	hsa-miR-576-3p	hsa-miR-708-3p
ASCRP000055	2.295e-08	2.84987	up	hsa_circRNA_000482	chr8	-	142264087	142264728	NM_001286646	SLC45A4	AATACTGTTGCAGATTGATCATCCAGTCACTCGATGGGGATTACCA	924.833	303	9.01081	7.49991	947	973	859	885	938	947	316	279	333	287	296	307	8.86972	9.11004	9.06922	8.89645	9.07981	9.0396	7.48414	7.43114	7.84155	7.51339	7.17948	7.54977	hsa-miR-335-3p	hsa-miR-194-5p	hsa-miR-15a-5p	hsa-miR-557	hsa-miR-548c-3p
ASCRP001774	1.74158e-05	2.03261	up	hsa_circRNA_101415	chr14	+	77930940	77934851	uc001xtw.3	AHSA1	TGGCCAGAGGAGTTCACCCAGGGCATGATCTTACCTACAATGAATG	683.833	282.5	8.28721	7.26388	687	644	633	680	773	686	272	271	266	295	313	278	8.07123	8.10524	8.3763	8.28269	8.68752	8.20028	6.9317	7.33575	7.10108	7.59928	7.41538	7.20006	hsa-miR-193b-5p	hsa-miR-1296-3p	hsa-miR-632	hsa-miR-136-5p	hsa-miR-324-3p
ASCRP000385	2.002e-08	6.16006	up	hsa_circRNA_002144	chr14	-	20811282	20811431			AGTGAGTTCAATGGCTGAGGTGAGTTCCCAGAGAACGGGGCTCCGC	13417.7	1785.83	13.4497	10.8267	11450	17542	14488	12091	13377	11558	2354	2111	1845	1404	1733	1268	13.2686	13.7244	13.5739	13.368	13.4518	13.3115	11.2929	11.1213	10.9345	10.4738	10.7862	10.3518	hsa-miR-615-5p	hsa-miR-663a	hsa-miR-296-5p	hsa-miR-345-3p	hsa-miR-650
ASCRP000862	1.298e-08	3.08591	up	hsa_circRNA_100479	chr1	-	231090078	231097049	uc009xfj.3	TTC13	AATGCTTCAGAGTCATCCTTTTTGAACTTCCATGACTCAGACTGCG	1401	395.167	9.88203	8.25633	1425	1354	1611	1261	1447	1308	431	363	385	370	433	389	9.94934	9.95037	10.2042	9.71102	9.80258	9.67463	8.36686	8.10043	8.19146	8.1672	8.47184	8.24019	hsa-miR-26b-3p	hsa-miR-149-5p	hsa-miR-607	hsa-miR-641	hsa-miR-545-5p
ASCRP004667	4.56345e-06	2.34897	up	hsa_circRNA_104411	chr7	-	75103969	75104454	uc003udk.4	POM121C	ATTTCCATGTCAACATAGTCCTGGGGCCAGTGTCATTCAAAGATGT	901.333	326.5	8.94519	7.71316	943	971	842	845	963	844	328	331	345	343	334	278	8.86379	9.10121	9.0388	8.79887	9.13656	8.73188	7.60763	7.88949	7.92925	7.98986	7.66266	7.20006	hsa-miR-660-3p	hsa-miR-708-3p	hsa-miR-499a-3p	hsa-miR-145-5p	hsa-miR-744-3p
ASCRP000389	4.71e-08	7.07454	up	hsa_circRNA_002172	chr14	-	20811305	20811436			TTGGAACAGACTCACGGCCAGCGAAGTGAGTTCCCAGAGAACGGGG	7315.17	949.5	12.6439	9.8213	6498	8721	7443	7258	7211	6760	1300	1217	934	761	842	643	12.5349	12.9373	12.738	12.6711	12.5447	12.4376	10.3693	10.2904	9.8574	9.54986	9.61662	9.24416	hsa-miR-615-5p	hsa-miR-663a	hsa-miR-296-5p	hsa-miR-345-3p	hsa-miR-622
ASCRP002647	6.8295e-07	3.39842	up	hsa_circRNA_102328	chr18	+	21644103	21649235	uc002kuu.3	TTC39C	AACAAGAATTGTCAGAAATCATAGCCCACTAATGAGTTTTGGAGCC	1054.5	308.833	9.29847	7.5336	1172	952	1051	982	1101	1069	339	303	333	318	286	274	9.53325	9.03376	9.40274	9.12379	9.34863	9.34863	7.71223	7.65253	7.84155	7.80761	7.05028	7.1374	hsa-miR-670-3p	hsa-miR-320a	hsa-miR-320b	hsa-miR-320c	hsa-miR-548a-3p
ASCRP003786	2.6e-10	2.56733	up	hsa_circRNA_103488	chr3	+	149563797	149589941	uc003exn.4	RNF13	TGTAATTTTGATATAAAGGTGATTTTACAACGAGATGCTGCTCTCC	4135	1302.5	11.7348	10.3746	4031	3915	4241	4181	4188	4254	1327	1171	1156	1423	1370	1368	11.6898	11.6898	11.8012	11.8279	11.6799	11.7205	10.4035	10.2428	10.2157	10.4925	10.4149	10.4781	hsa-miR-654-3p	hsa-miR-511-5p	hsa-miR-632	hsa-miR-1264	hsa-miR-650
ASCRP000294	0.000101832	2.30532	up	hsa_circRNA_001547	chr9	-	95500310	95500614			AGGGCAGTGGGTGGGAGGGTGCAGGCACTGGCCTGGGGCTGCTCTT	1036.5	366.833	9.24634	8.04137	1011	1359	1058	988	905	898	381	369	396	309	338	408	9.06777	9.96	9.41627	9.14029	8.98596	8.90776	8.03754	8.14167	8.266	7.73329	7.70706	8.36267	hsa-miR-661	hsa-miR-662	hsa-miR-593-5p	hsa-miR-103a-3p	hsa-miR-107
ASCRP000407	7.0828e-07	4.15253	up	hsa_circRNA_100017	chr1	-	1747194	1756938	uc001aif.3	GNB1	GGGGCACAGACTCCAGATCTCACATTCTTGAAGGTGGCATTGAAGA	1351.33	337.833	9.82588	7.77189	1493	1412	1263	1334	1267	1339	329	390	341	364	291	312	10.0618	10.0213	9.73492	9.83966	9.56772	9.72997	7.62112	8.26931	7.89909	8.13142	7.10894	7.60145	hsa-miR-660-3p	hsa-miR-152-3p	hsa-miR-764	hsa-miR-148b-3p	hsa-miR-30c-1-3p
ASCRP000961	0	5.60838	up	hsa_circRNA_100583	chr10	-	32197099	32199491	uc001ivz.1	ARHGAP12	ACAGATAAGGGTTTAAATGTGATACTGGTGTAGATCTCCTTGTTCT	7834.67	1194.83	12.7407	10.2531	8050	8054	7386	7567	8049	7902	1117	1255	1229	1226	1217	1125	12.8159	12.8285	12.7281	12.7492	12.6419	12.6803	10.1625	10.3383	10.3231	10.2744	10.2248	10.1953	hsa-miR-135b-5p	hsa-miR-135a-5p	hsa-miR-518c-5p	hsa-miR-552-3p	hsa-miR-30c-1-3p
ASCRP001328	7.4279e-07	2.41775	up	hsa_circRNA_100956	chr11	-	116734383	116744352	uc001ppy.3	SIK3	AACAGCAGCATCAAACAGCTGCAGCAGGAGCAGTCTCTCCTACAGC	7389.67	2437.33	12.6306	11.357	7473	6815	7647	6928	8438	7037	2566	1872	2799	2113	2874	2400	12.6878	12.5314	12.7492	12.5349	12.7492	12.5314	11.4002	10.9245	11.5724	11.1768	11.6388	11.4289	hsa-miR-149-5p	hsa-miR-138-5p	hsa-miR-125a-3p	hsa-miR-181a-5p	hsa-miR-421
ASCRP003809	0.00051895	2.4869	up	hsa_circRNA_103511	chr3	+	171830241	171830380	uc003fhx.3	FNDC3B	AGCTCAGCAGGAAGCCAGTTGAGGGAAGTTCTCCATGAATGTACGT	957.667	321.167	8.98261	7.66826	829	724	1101	794	1300	998	288	268	378	296	362	335	8.53608	8.40815	9.47548	8.66281	9.60948	9.20365	7.16279	7.29384	8.14103	7.60978	7.95637	7.84574	hsa-miR-525-5p	hsa-miR-1296-3p	hsa-miR-520a-5p	hsa-miR-584-3p	hsa-miR-758-3p
ASCRP002398	1.70299e-06	76.1088	up	hsa_circRNA_102063	chr17	+	37864573	37866734	uc010cwa.3	ERBB2	ACTGCCTGTCCCTGATATCCAGGAGGTGCAGGGCTACGTGCTCATC	1003.17	180	9.19965	2.94966	991	1026	990	1055	964	993	232	199	164	163	152	170	8.99329	9.25217	9.31826	9.30862	9.13987	9.1857	6.08831	2.32193	2.32193	2.32193	2.32193	2.32193	hsa-miR-449c-5p	hsa-miR-194-3p	hsa-miR-34b-5p	hsa-miR-187-3p	hsa-miR-608
ASCRP002539	4.5e-10	2.93747	up	hsa_circRNA_102211	chr17	+	76410959	76415806	uc010dho.3	PGS1	TCTCAGCACGATTTTCCCGAGAGTTCACAGGCCTCTGGCTGTACCT	1758.33	493.333	10.3174	8.76281	1772	1705	1623	1610	2114	1726	548	496	495	490	489	442	10.4101	10.3595	10.218	10.247	10.4941	10.1756	8.90325	8.76113	8.79509	8.77629	8.76321	8.57789	hsa-miR-520g-5p	hsa-miR-412-3p	hsa-miR-608	hsa-miR-597-3p	hsa-miR-127-5p
ASCRP000339	1.7e-10	2.90955	up	hsa_circRNA_001826	chr21	+	38792600	38794168	uc031rvi.1	DYRK1A	AAGTAGATGCTCACTTTCGACTGAGTGTTATAGTTTTGCCGCTGGA	2029.17	575.167	10.5825	9.04172	2062	1997	1958	2000	2109	2049	530	617	583	592	559	570	10.6404	10.6463	10.5837	10.604	10.4853	10.5354	8.82017	9.20579	9.08503	9.10121	8.97286	9.0653	hsa-miR-708-5p	hsa-miR-28-5p	hsa-miR-586	hsa-miR-539-5p	hsa-miR-665
ASCRP005012	0.0496908	5.05857	up	hsa_circRNA_104762	chr9	-	33953282	33973235	uc011lof.1	UBAP2	CTCCTGTTCTCCTCAGAGCCTGGATTTGGACGTGGCAGAGGGAGAG	4719.5	1062.17	11.3825	9.04379	7345	10084	1764	6082	1557	1485	901	3156	300	1072	221	723	12.6568	13.0969	10.3785	12.3784	9.89538	9.88906	9.81905	11.6464	7.51995	10.0857	5.72991	9.46165	hsa-miR-34c-5p	hsa-miR-449a	hsa-miR-449b-5p	hsa-miR-449c-5p	hsa-miR-370-3p
ASCRP005097	0	68.8258	up	hsa_circRNA_104850	chr9	+	110062421	110068928	uc011lwa.2	RAD23B	CAGCAACTGACAGGTGAAAGCACTGAAAGAGAAGATTGAATCTGAA	725	181.333	8.42681	2.32193	825	730	812	631	726	626	200	200	197	180	164	147	8.52208	8.42328	8.97668	8.1	8.56176	7.97703	2.32193	2.32193	2.32193	2.32193	2.32193	2.32193	hsa-miR-138-5p	hsa-miR-325	hsa-miR-593-3p	hsa-miR-512-3p	hsa-miR-766-5p
ASCRP004079	8.5196e-07	2.00658	up	hsa_circRNA_103789	chr5	+	10414544	10415781	uc003jet.1	MARCH6	GGTTAAAGAGTGGTCTCTCATGATATTTCTGTTGATTGTCTTCATG	1840.67	709.833	10.3951	9.3904	1679	1936	1567	1748	1946	2168	657	620	742	692	819	729	10.3178	10.5897	10.1606	10.3714	10.3105	10.6209	9.2245	9.21178	9.4775	9.37721	9.5655	9.48591	hsa-miR-545-3p	hsa-miR-485-5p	hsa-miR-552-5p	hsa-miR-584-5p	hsa-miR-758-5p
ASCRP000403	6.241e-08	6.85899	up	hsa_circRNA_100013	chr1	-	1735857	1756938	uc001aif.3	GNB1	CTGGCAGGACACACAGATCTCACATTCTTGAAGGTGGCATTGAAGA	967.5	233.167	9.12946	6.35147	1054	1064	911	919	933	924	251	222	251	227	242	206	9.20079	9.3715	9.16584	8.99741	9.06922	8.97202	6.56539	6.50578	6.826	6.46009	6.25736	5.4942	hsa-miR-660-3p	hsa-miR-152-3p	hsa-miR-764	hsa-miR-148b-3p	hsa-miR-30c-1-3p
ASCRP001855	0.0304098	6.51234	up	hsa_circRNA_101504	chr15	+	44046021	44048964	uc001zsu.3	PDIA3	AGGACTGCTGGTGTGGACACTGCAAGAGACTTGCACCTGAGTATGA	613.333	275.167	8.01816	5.31498	697	663	573	597	592	558	628	219	209	183	228	184	8.10087	8.19167	8.06361	7.9537	8.10415	7.69493	9.14444	6.42694	5.75684	2.32193	5.91781	2.32193	hsa-miR-34c-5p	hsa-miR-454-3p	hsa-miR-148a-3p	hsa-miR-301a-3p	hsa-miR-103a-2-5p
ASCRP005069	5.2851e-07	3.88058	up	hsa_circRNA_104820	chr9	+	96233422	96259881	uc004atx.3	FAM120A	AAGATGTTTTCCAGCATTCACAGGTTGCACAGAGCATTGAGGATCA	1723.67	412.167	10.2687	8.31244	1809	1932	1681	1575	1806	1539	496	485	433	347	376	336	10.4366	10.5749	10.2796	10.1905	10.1625	9.96824	8.68693	8.71824	8.49101	8.02674	8.09868	7.85304	hsa-miR-409-3p	hsa-miR-153-3p	hsa-miR-9-5p	hsa-miR-152-3p	hsa-miR-148b-3p
ASCRP000441	1.576e-08	2.19233	up	hsa_circRNA_100051	chr1	-	11181302	11182183	uc001asc.3	MTOR	CAGCTCCGAGCATCCAGAGATACGCTGTCATCCCTTTATCGACCAA	1658.83	588.667	10.1993	9.06686	1523	1422	1674	1601	1927	1806	547	537	615	567	625	641	10.1021	10.0425	10.2639	10.2392	10.2809	10.2673	8.89847	8.92394	9.14953	9.03491	9.15682	9.2375	hsa-miR-491-5p	hsa-miR-544a	hsa-miR-27b-3p	hsa-miR-27a-3p	hsa-miR-431-3p
ASCRP001987	3.3951e-07	2.66018	up	hsa_circRNA_101638	chr15	+	89656955	89698765	uc002bnj.2	ABHD2	TTCACCTATGCTTTTAGGTTTGTTTGAATAAGAGATCTGACCTGAC	877.167	298.667	8.87299	7.46147	850	886	932	898	832	865	286	279	297	316	323	291	8.60717	8.84339	9.20894	8.9381	8.83959	8.80076	7.13441	7.43114	7.48749	7.7963	7.54012	7.37936	hsa-miR-409-3p	hsa-miR-206	hsa-miR-141-5p	hsa-miR-338-3p	hsa-miR-626
ASCRP003202	2.01393e-05	2.19247	up	hsa_circRNA_102894	chr2	+	202010100	202014558	uc010fsx.3	CFLAR	GGCAATGAGACAGCTCCATAATGGGAGAAGTAAAGAACAAAGACTT	696	279.333	8.33916	7.2066	750	791	660	677	669	629	285	264	246	290	288	303	8.28212	8.58417	8.50249	8.27631	8.40425	7.9856	7.12367	7.24593	6.73525	7.54785	7.07546	7.51141	hsa-miR-145-3p	hsa-miR-643	hsa-miR-653-3p	hsa-miR-876-5p	hsa-miR-561-3p
ASCRP004523	2.95752e-05	2.50516	up	hsa_circRNA_104252	chr6	+	159001971	159010814	uc003qrj.1	TMEM181	GAACTTCACAGACCTAAAGTGATCCAGACTTCTGCGGCTAATTTTT	766.333	283.833	8.55728	7.23237	824	836	719	817	762	640	286	339	260	259	279	280	8.51684	8.70332	8.70101	8.73046	8.65448	8.03754	7.13441	7.9447	6.98535	7.14846	6.94932	7.232	hsa-miR-493-5p	hsa-miR-100-3p	hsa-miR-302b-5p	hsa-miR-218-1-3p	hsa-miR-181a-3p
ASCRP004150	0.00020741	2.33006	up	hsa_circRNA_103862	chr5	+	68467096	68470236	uc003jvm.3	CCNB1	ATGACTGTCTCCATTATTGATCGGTTCATGCAGGTTGATACTGCCT	1122.83	399.667	9.43541	8.21505	1225	1157	1299	1024	1095	937	426	463	462	393	337	317	9.61961	9.60679	9.79583	9.2381	9.3442	9.00796	8.33854	8.63677	8.65239	8.30472	7.69609	7.66177	hsa-miR-544a	hsa-miR-670-3p	hsa-miR-617	hsa-miR-493-5p	hsa-miR-575
ASCRP003767	0.000120744	2.74649	up	hsa_circRNA_103469	chr3	+	128984391	128985942	uc003els.3	COPG	TTACCCAGTATCTTGGTGTTGCTGAAGAGGGTGGCTTTGAGTATAA	628.667	246.5	8.0916	6.63401	710	660	625	594	615	568	251	277	257	235	222	237	8.14868	8.1745	8.34503	7.94226	8.20273	7.73639	6.56539	7.41185	6.9317	6.68939	5.7635	6.44222	hsa-miR-146b-3p	hsa-miR-383-3p	hsa-miR-576-3p	hsa-miR-502-5p	hsa-miR-509-3p
ASCRP001986	1.6e-09	3.14471	up	hsa_circRNA_101637	chr15	+	89656955	89659752	uc002bnj.2	ABHD2	TGACCAAAGACTTTTAGGTTTGTTTGAATAAGAGATCTGACCTGAC	1570.67	428.833	10.1089	8.45595	1538	1651	1523	1485	1466	1761	450	427	414	418	408	456	10.1135	10.3009	10.1054	10.0931	9.81638	10.224	8.47319	8.47184	8.37449	8.46267	8.32023	8.63329	hsa-miR-338-3p	hsa-miR-509-5p	hsa-miR-92a-2-5p	hsa-let-7b-5p	hsa-miR-185-3p
ASCRP002090	0.0262746	3.29204	up	hsa_circRNA_101744	chr16	+	19627435	19663412	uc002dgn.2	C16orf62	CTCTCCCAAGGTGGGAATGGAAGTGGCCCCACATCTCAAAGAAACC	16465.3	5455.33	13.6483	11.9293	12452	29064	10785	24180	8211	14100	3070	15313	1339	7550	1233	4227	13.4045	14.477	13.214	14.4198	12.6878	13.6864	11.6682	13.9444	10.4278	13.0533	10.2368	12.2451	hsa-miR-512-5p	hsa-miR-553	hsa-miR-489-3p	hsa-miR-105-5p	hsa-miR-627-3p
ASCRP003870	1.24989e-06	3.78419	up	hsa_circRNA_103572	chr3	+	197592293	197602646	uc003fyk.2	LRCH3	GGTGTACCTCAGAGTGATGACAGACCTAATGCTCTATTAAGTTCAC	1102.17	306.333	9.40733	7.48734	1121	1109	1091	1039	1094	1159	333	299	282	350	265	309	9.39491	9.50291	9.46088	9.27029	9.34253	9.47243	7.66444	7.6199	7.31928	8.04507	6.7033	7.57206	hsa-miR-29b-2-5p	hsa-miR-544a	hsa-miR-29a-5p	hsa-miR-518c-5p	hsa-miR-214-3p
ASCRP001180	8.0404e-07	2.34772	up	hsa_circRNA_100806	chr11	-	46515157	46534363	uc001ncu.1	AMBRA1	AGGGTCCTGGCAGGAGGCTGCTGGAATCTTCCCTCATTTCATTATC	2954.33	991	11.1791	9.94786	2493	2690	2581	2915	3304	3743	853	843	967	1044	1208	1031	10.9226	11.1178	11.0251	11.2181	11.2749	11.5163	9.71102	9.76009	9.92388	10.0375	10.199	10.0557	hsa-miR-330-5p	hsa-miR-494-5p	hsa-miR-326	hsa-miR-139-3p	hsa-miR-765
ASCRP004827	0.00367394	3.06873	up	hsa_circRNA_104574	chr8	-	27151596	27151827	uc003xfm.1	TRIM35	ACGTTTCTTTTCTCATGGTGGAGGCTGCATGGCTGGAAGGCCGGAT	2335.67	633.667	10.6644	9.04679	2999	3363	1441	3024	1657	1530	580	1060	395	712	381	674	11.2366	11.4725	10.0163	11.2819	10.0213	9.95813	8.99882	10.1263	8.25836	9.4328	8.14103	9.32343	hsa-miR-21-5p	hsa-miR-205-5p	hsa-miR-873-5p	hsa-miR-558	hsa-miR-495-5p
ASCRP003790	1.38e-09	2.49038	up	hsa_circRNA_103492	chr3	+	149563797	149639014	uc003exn.4	RNF13	TACATAAATTCAAGAAAGGTGATTTTACAACGAGATGCTGCTCTCC	4542.83	1481.67	11.8875	10.5711	4529	4577	4095	4720	4765	4571	1530	1284	1607	1463	1518	1488	11.8855	11.9865	11.7668	12.0256	11.8036	11.8568	10.6167	10.3595	10.6845	10.5408	10.5723	10.6527	hsa-miR-654-3p	hsa-miR-34b-5p	hsa-miR-580-5p	hsa-miR-7-5p	hsa-miR-511-5p
ASCRP004492	8.17238e-05	2.15397	up	hsa_circRNA_104220	chr6	+	150092297	150094305	uc003qna.3	PCMT1	CAGTGCTCCACACATGAAAATGGAATCATCAAGACAGATAAAGTAT	708.833	287.167	8.39504	7.28805	800	706	744	671	670	662	301	300	297	289	289	247	8.44034	8.34669	8.80076	8.25364	8.40815	8.12066	7.32191	7.62904	7.48749	7.53559	7.08479	6.66945	hsa-miR-338-3p	hsa-miR-19a-5p	hsa-miR-450a-1-3p	hsa-miR-769-5p	hsa-miR-153-3p
ASCRP000062	5.8e-10	2.06295	up	hsa_circRNA_000543	chr11	+	65272490	65272586			CTGGAGTAACTGGCATGTGAACAAGCTTTTTCTGTATTTACATACA	6898.17	2692	12.5445	11.4998	7268	6935	6827	6641	7093	6625	2694	2919	2789	2823	2489	2438	12.6503	12.5726	12.6224	12.5077	12.4927	12.4214	11.4854	11.5321	11.5622	11.579	11.3944	11.4457	hsa-miR-338-3p	hsa-miR-9-3p	hsa-miR-16-2-3p	hsa-miR-320b	hsa-miR-320a
ASCRP003406	2.18741e-06	2.04077	up	hsa_circRNA_103102	chr20	-	61537238	61545758	uc002ydr.2	DIDO1	TTGTATAAATGAGCTTACTCCACGGGAACAGCCTCTAGATAATCTG	1866.83	702.667	10.4112	9.38209	1487	1649	2068	2023	2017	1957	803	669	732	638	716	658	10.0557	10.2973	10.6867	10.6132	10.3972	10.4172	9.59789	9.35938	9.4578	9.2375	9.35874	9.28125	hsa-miR-185-3p	hsa-miR-485-5p	hsa-miR-516a-3p	hsa-miR-516b-3p	hsa-miR-627-3p
ASCRP003152	0.00162623	2.92778	up	hsa_circRNA_102844	chr2	+	169547543	169574488	uc002ueb.1	CERS6	TTCCTCTCTGACCCCCTGGTTGTGGAATACGAGGCATTGCTGGTAC	32181.8	9622.83	14.7191	13.1693	44833	41051	36758	25242	25031	20176	16021	16534	8931	7294	4201	4756	15.2222	15.0454	14.9675	14.477	14.4329	14.1698	14.078	14.0428	13.2632	12.9823	12.22	12.4297	hsa-miR-608	hsa-miR-570-3p	hsa-miR-380-3p	hsa-miR-493-3p	hsa-miR-548d-3p
ASCRP004478	9.3e-10	2.3869	up	hsa_circRNA_104205	chr6	+	144086397	144086935	uc003qjq.4	PHACTR2	GTGTTAACAGAGAAAATGCAAAATGCTGGCTCCTCTCATTCAAAAA	3246.5	1060.67	11.3282	10.0731	3312	3302	2961	3384	3285	3235	1122	1010	1134	1081	959	1058	11.3613	11.4218	11.2314	11.4191	11.2609	11.2749	10.1767	10.0489	10.156	10.1043	9.86063	10.0918	hsa-miR-550a-5p	hsa-miR-550a-3-5p	hsa-miR-203a-5p	hsa-miR-149-3p	hsa-miR-611
ASCRP004887	3.05131e-06	70.8898	up	hsa_circRNA_104634	chr8	-	62593526	62596747	uc003xuo.2	ASPH	CCAAAGTTTTATTAGAGACAAAGCATGGAGGACACAAGAATGGGAG	979.333	190.833	9.11991	2.9724	1044	1046	1049	916	1008	813	237	203	197	171	176	161	9.18415	9.30938	9.39687	8.99234	9.21421	8.6225	6.22477	2.32193	2.32193	2.32193	2.32193	2.32193	hsa-miR-384	hsa-miR-670-3p	hsa-miR-548c-3p	hsa-miR-145-3p	hsa-miR-376a-5p
ASCRP003273	1.0029e-07	2.57711	up	hsa_circRNA_102966	chr2	-	242079935	242082489	uc002wao.2	PASK	GACCACAGAGTTGTTAGAGTTGGAAGCTTGGCAGTTGGCCTCCCTT	3026.17	940.833	11.2288	9.86307	2977	2817	2699	3110	3325	3229	923	685	948	1014	1043	1032	11.2314	11.1807	11.0838	11.3235	11.2874	11.2661	9.87274	9.407	9.88792	9.98115	9.96908	10.0605	hsa-miR-449b-5p	hsa-miR-449a	hsa-miR-761	hsa-miR-214-3p	hsa-miR-34a-5p
ASCRP002604	4.9114e-07	3.30392	up	hsa_circRNA_102285	chr18	+	196636	199316	uc002kkf.1	USP14	CAGGAAGTCAAGTATCTTTTTACAGGACTTAAATTGCCCTTAGAGA	986.667	297.333	9.15112	7.42695	1092	1031	938	953	1050	856	315	247	325	260	311	326	9.30596	9.27029	9.21886	9.06922	9.2767	8.76569	7.472	7.00561	7.76292	7.16279	7.39266	7.76569	hsa-miR-627-3p	hsa-miR-15b-3p	hsa-miR-181d-5p	hsa-miR-181b-5p	hsa-miR-367-5p
ASCRP005177	4.34645e-06	2.05464	up	hsa_circRNA_104930	chr9	+	131271154	131277918	uc004bvi.3	GLE1	GAAAGGAACAGATGTTTTAGAAGAATGTATGTCTCTTCCCAAGCTA	1224.5	451.667	9.59903	8.56014	1302	1096	1200	1062	1297	1390	472	382	424	433	498	501	9.75704	9.48591	9.64318	9.32277	9.60548	9.77978	8.56128	8.21936	8.4334	8.53316	8.78722	8.82641	hsa-miR-762	hsa-miR-659-3p	hsa-miR-448	hsa-miR-877-5p	hsa-miR-624-5p
ASCRP002397	2.3924e-07	42.4064	up	hsa_circRNA_102062	chr17	-	37840849	37842272	uc002hsj.3	PGAP3	CTTCGCCTGGGCTGGACCTGTCGGGACGACTGTAAGTATGAGTGTA	647	183.667	8.16139	2.75518	688	737	588	651	626	592	226	195	192	144	199	146	8.07413	8.45326	8.16574	8.1745	8.25915	7.84155	2.32193	2.32193	2.32193	2.32193	4.92142	2.32193	hsa-miR-18a-5p	hsa-miR-485-5p	hsa-miR-150-3p	hsa-miR-433-5p	hsa-miR-18b-5p
ASCRP000315	7.61384e-05	7.95168	up	hsa_circRNA_001678	chr14	-	20811404	20811492			TCCGCGCGAGGTCTGAGACTAGGGCCAGAGGCGGCCCTAACAGGGC	2368.83	376.333	10.7963	7.80508	2171	2844	2251	2778	1729	2440	323	533	231	454	267	450	10.7042	11.1986	10.8127	11.1401	10.0884	10.8341	7.55298	8.90023	6.39729	8.63344	6.73751	8.60902	hsa-miR-127-5p	hsa-miR-326	hsa-miR-330-5p	hsa-miR-597-3p	hsa-miR-204-3p
ASCRP001387	0	109.398	up	hsa_circRNA_101017	chr12	+	13061176	13062105	uc001rba.3	GPRC5A	TACTCTCAAGAGGAAATCACTCAAGGTCCAGAATGGCTACAACAGT	959	175.667	9.09538	2.32193	1017	929	862	935	1025	986	190	172	161	177	168	186	9.08691	8.97692	9.07815	9.02986	9.2392	9.16123	2.32193	2.32193	2.32193	2.32193	2.32193	2.32193	hsa-miR-214-3p	hsa-miR-583	hsa-miR-423-5p	hsa-miR-761	hsa-miR-219a-1-3p
ASCRP001889	8.121e-08	4.50259	up	hsa_circRNA_101538	chr15	-	60648117	60656722	uc002agk.3	ANXA2	GATGGTTGCCCTGGCAAAGGTGTGGATGAGGTCACCATTGTCAACA	1237.83	302	9.64916	7.4784	1255	1247	1241	1190	1247	1247	267	261	311	305	339	329	9.68482	9.7708	9.70743	9.58465	9.54649	9.60076	6.83445	7.20415	7.63571	7.69435	7.71252	7.78925	hsa-miR-224-5p	hsa-miR-208a-5p	hsa-miR-33b-5p	hsa-miR-1301-3p	hsa-miR-488-5p
ASCRP004480	4.09669e-06	2.53036	up	hsa_circRNA_104207	chr6	+	147527106	147560406	uc003qly.3	STXBP5	AAATTTTGCAGAGAAAGACTGTTCGCCATGGATTTCCCTATCAACC	959.167	327	9.08323	7.74389	937	897	887	1004	966	1064	322	278	360	312	387	303	8.84535	8.87228	9.11037	9.18755	9.14518	9.33864	7.54237	7.421	8.04005	7.76403	8.18445	7.51141	hsa-miR-506-3p	hsa-miR-587	hsa-miR-29a-3p	hsa-miR-29b-3p	hsa-miR-29c-3p
ASCRP004919	3.05e-08	2.51147	up	hsa_circRNA_104666	chr8	-	101721360	101725409	uc003yjt.1	PABPC1	AGACCTCATCGGCCTGCCTTAAGTGTGAAAGTAATGACTGATGAAA	2302.83	740.333	10.7984	9.46983	2451	2295	2267	2223	2237	2344	820	835	698	738	684	667	10.9094	10.8763	10.8249	10.7862	10.6132	10.7802	9.63026	9.74602	9.36668	9.48792	9.28838	9.29968	hsa-miR-1468-5p	hsa-miR-9-3p	hsa-miR-2113	hsa-miR-561-3p	hsa-miR-494-3p
ASCRP003049	9.79602e-06	2.23719	up	hsa_circRNA_102737	chr2	-	61749745	61761038	uc002sbj.3	XPO1	CAGTGCGAAGTAATCTATGCCAGCAATTATGACAATGTTAGCAGAC	790.5	302.833	8.6441	7.48241	872	838	742	771	779	741	306	312	318	310	311	260	8.68328	8.71238	8.79333	8.59882	8.70519	8.37159	7.38189	7.73329	7.70706	7.74342	7.39266	6.93613	hsa-miR-221-3p	hsa-miR-599	hsa-miR-145-5p	hsa-miR-23a-3p	hsa-miR-197-3p
ASCRP000074	0.000247413	2.11494	up	hsa_circRNA_000596	chr15	+	100645330	100645426			CCGGGAGATGGTGCTGTTGCCACCCACCAGGATGGTGGCTCTTTTG	864.333	330.333	8.83929	7.75867	870	691	672	1015	927	1011	323	279	314	371	339	356	8.67918	8.29863	8.55314	9.21523	9.05268	9.23691	7.55298	7.43114	7.66946	8.1745	7.71252	8.01145	hsa-miR-647
ASCRP004957	1.24242e-06	2.06126	up	hsa_circRNA_104705	chr8	-	141810557	141900868	uc003yvs.3	PTK2	CCTCAGAAAGAATATGACAGATACCTAGCATCTAGCAAAATAATGG	903.333	346	8.94671	7.90319	1059	893	843	903	913	809	383	323	358	340	354	318	9.21421	8.85733	9.0404	8.95019	9.01006	8.60809	8.04939	7.8119	8.02582	7.97129	7.88772	7.673	hsa-miR-301a-5p	hsa-miR-627-3p	hsa-miR-545-5p	hsa-miR-182-5p	hsa-miR-200b-3p
ASCRP003788	1e-11	2.31024	up	hsa_circRNA_103490	chr3	+	149563797	149619949	uc003exn.4	RNF13	CACATATGAAAAAGGGTGATTTTACAACGAGATGCTGCTCTCCATA	2942.67	997.333	11.18	9.97192	3081	2722	2819	2960	3180	2894	1020	982	1015	996	984	987	11.2766	11.1315	11.1315	11.2456	11.1768	11.1178	10.0042	10.0036	9.99906	9.95534	9.88461	9.98471	hsa-miR-654-3p	hsa-miR-511-5p	hsa-miR-632	hsa-miR-643	hsa-miR-889-5p
ASCRP003850	0.001136	16.7585	up	hsa_circRNA_103552	chr3	-	195101737	195112876	uc003fun.4	ACAP2	AATTTTCACACAGGCAGCTTTGGAAGAAGTAGAAGGTGATGTGGCA	711.333	209.833	8.3971	4.33028	825	779	685	686	631	662	201	221	198	226	189	224	8.52208	8.55602	8.59665	8.307	8.28018	8.12066	2.32193	6.47368	2.32193	6.43112	2.32193	6.1111	hsa-miR-200c-3p	hsa-miR-21-5p	hsa-miR-576-5p	hsa-miR-200b-3p	hsa-miR-561-3p
ASCRP004924	8.79147e-05	2.53201	up	hsa_circRNA_104671	chr8	-	103372298	103373854	uc003ykr.2	UBR5	ACACCTTAGGGTTACGAGAAGTTTCTGAGAAGCTGAACAAATATAA	655.167	258.333	8.20274	6.86246	664	676	661	614	602	714	252	289	257	263	237	252	7.99364	8.24535	8.50944	8.02721	8.15101	8.28982	6.5818	7.53429	6.9317	7.20129	6.14377	6.78188	hsa-miR-618	hsa-miR-324-3p	hsa-miR-633	hsa-miR-596	hsa-miR-608
ASCRP004465	9.69e-09	2.78371	up	hsa_circRNA_104192	chr6	-	135748304	135777064	uc003qgh.3	AHI1	GATTTCCATGTGGACGGCCTGTTTCATCTTACTATGAAAAAGAGAA	1556.5	460.5	10.0835	8.60647	1602	1624	1546	1400	1573	1594	539	440	417	450	472	445	10.2127	10.2726	10.1292	9.95534	9.90983	10.0213	8.85317	8.52633	8.39106	8.60516	8.6705	8.59261	hsa-miR-335-3p	hsa-miR-587	hsa-miR-1185-2-3p	hsa-miR-105-5p	hsa-miR-1185-1-3p
ASCRP003811	0.0247301	4.9185	up	hsa_circRNA_103513	chr3	+	171830241	171944737	uc003fhy.3	FNDC3B	TATATCTCACAGGAAGCCAGTTGAGGGAAGTTCTCCATGAATGTAC	882.167	272.667	8.78298	6.48475	791	622	898	750	1301	931	269	185	297	266	321	298	8.40956	8.01494	9.13901	8.52959	9.6124	8.99234	6.87803	2.32193	7.48749	7.24514	7.51141	7.46453	hsa-miR-619-3p	hsa-miR-93-3p	hsa-miR-490-3p	hsa-miR-525-5p	hsa-miR-1296-3p
ASCRP002859	8.07e-09	2.69708	up	hsa_circRNA_102546	chr19	-	40327195	40328483	uc002omo.2	FBL	TGATTTCCATTAAGGATGGTCTAGTCTATGCAGTCGAGTTCTCCCA	7899.17	2357.17	12.7395	11.3081	7978	7139	8090	7571	8352	8265	2152	2091	2234	2620	2603	2443	12.7973	12.6251	12.7873	12.754	12.7281	12.7453	11.0732	11.111	11.2409	11.4967	11.4725	11.4545	hsa-miR-520g-3p	hsa-miR-520h	hsa-miR-513a-5p	hsa-miR-133a-3p	hsa-miR-133b
ASCRP000343	1e-11	8.14988	up	hsa_circRNA_001846	chr14	-	20811436	20811559			CTCCCTGAGCTTCGGGGAGGGAAGCTCATCAGTGGGGCCACGAGCT	4285.17	497.333	11.8032	8.77644	4573	4584	4403	4147	4208	3796	545	525	515	454	488	457	11.9081	11.9943	11.8855	11.806	11.6934	11.5321	8.88658	8.87126	8.87382	8.63344	8.75766	8.63586	hsa-miR-328-3p	hsa-miR-1296-5p	hsa-miR-146b-3p	hsa-miR-330-5p	hsa-miR-608
ASCRP000766	0.000133353	25.7256	up	hsa_circRNA_100381	chr1	+	167935866	167944253	uc001gev.3	DCAF6	GAACTACTTATGAGGTTAATACAATCTGTTGGAATGACACTGGAGA	661.167	195	8.22568	3.54055	738	700	660	597	624	648	207	217	196	201	181	168	8.24891	8.33147	8.50249	7.9537	8.24851	8.06899	2.32193	6.38223	2.32193	5.57334	2.32193	2.32193	hsa-miR-525-5p	hsa-miR-544a	hsa-miR-345-3p	hsa-miR-577	hsa-miR-587
ASCRP003048	0.000218569	2.24572	up	hsa_circRNA_102736	chr2	-	61749745	61753656	uc002sbj.3	XPO1	CAGTGCGAAGCAAAGAATGGCTCAAGAAGTACTGACACATTTAAAG	680	276.833	8.28594	7.11876	754	728	643	650	682	623	300	302	257	278	293	231	8.29595	8.41573	8.42573	8.17179	8.44138	7.96505	7.30794	7.64384	6.9317	7.40264	7.13569	6.29076	hsa-miR-23a-3p	hsa-miR-23b-3p	hsa-miR-498	hsa-miR-599	hsa-miR-141-5p
ASCRP001469	2.6814e-07	2.89855	up	hsa_circRNA_101101	chr12	+	69983264	69987393	uc001svb.1	CCT2	CTCTTGTCACAGTTCCGATGAAGTTAAATTCCGTCAAGATTTAATG	1128.17	351	9.45754	7.92221	1121	1229	1068	1036	1111	1204	353	386	319	376	361	311	9.39491	9.73492	9.4381	9.25925	9.36823	9.54986	7.83024	8.24098	7.71681	8.20965	7.9447	7.59089	hsa-miR-205-5p	hsa-miR-544a	hsa-miR-450b-5p	hsa-miR-30d-3p	hsa-miR-30a-3p
ASCRP001856	3.101e-08	5.78368	up	hsa_circRNA_101505	chr15	+	44048846	44055404	uc010ued.2	PDIA3	ATAATGGAGAGTTGATTGCACTGCCAACACTAACACCTGTAATAAA	1041	250.833	9.27713	6.74514	1001	1134	968	979	1040	1124	244	217	261	259	286	238	9.02813	9.56359	9.27583	9.11818	9.25984	9.41723	6.41501	6.38223	7.00934	7.14846	7.05028	6.46554	hsa-miR-103a-2-5p	hsa-miR-181b-2-3p	hsa-miR-543	hsa-miR-154-3p	hsa-miR-296-3p
ASCRP001453	4.82832e-06	49.3274	up	hsa_circRNA_101085	chr12	-	57059987	57064148	uc001slu.4	PTGES3	GAGCAGATGATCTTAATTGGCTTAGTGTCGACTTCAATAATTGGAA	768.167	187.167	8.57835	2.95404	779	814	769	745	707	795	172	179	181	215	191	185	8.37847	8.63752	8.87228	8.51092	8.51586	8.55506	2.32193	2.32193	2.32193	6.11457	2.32193	2.32193	hsa-miR-15b-3p	hsa-miR-141-5p	hsa-miR-197-3p	hsa-miR-205-3p	hsa-miR-670-3p
ASCRP003071	6.32044e-05	2.01549	up	hsa_circRNA_102760	chr2	-	72361889	72362548	uc010yra.1	CYP26B1	ACCATGCAGGAGCTGAAGGTCTTCTCCAAGATCTTCAGCCACGAGG	1209.5	450.667	9.55331	8.54218	1044	1257	1259	1044	1336	1317	528	416	454	368	528	410	9.18415	9.78224	9.72742	9.2826	9.65351	9.68992	8.80748	8.41203	8.61486	8.15586	8.88836	8.37449	hsa-miR-502-5p	hsa-miR-764	hsa-miR-671-5p	hsa-miR-615-3p	hsa-miR-146b-3p
ASCRP003791	2.7351e-06	2.41193	up	hsa_circRNA_103493	chr3	+	149613259	149639014	uc003exn.4	RNF13	TTCAAGAAAGGTTTTAAATGCACAGAGAGCAGGATACAAGGCAGCC	1272.17	431.667	9.70607	8.43589	1296	1326	1228	1320	1177	1286	437	467	441	481	357	407	9.75273	9.89778	9.68189	9.80541	9.44751	9.65112	8.41062	8.6512	8.54319	8.73696	7.91562	8.35773	hsa-miR-580-5p	hsa-miR-7-5p	hsa-miR-889-5p	hsa-miR-619-3p	hsa-miR-613
ASCRP001816	1.41e-08	2.35306	up	hsa_circRNA_101465	chr15	-	28090104	28096621	uc001zbh.4	OCA2	TATGGGTTCTCCTTCATGGAATTTTTCAGATTCCCGTGCTCCTGAA	4089	1400.5	11.7135	10.479	4121	4136	3881	3780	4244	4372	1505	1463	1589	1222	1444	1180	11.7235	11.806	11.6744	11.6253	11.7059	11.746	10.5931	10.5956	10.6556	10.2673	10.4984	10.2639	hsa-miR-26b-3p	hsa-miR-675-5p	hsa-miR-544a	hsa-miR-589-5p	hsa-miR-146a-5p
ASCRP005061	0.0011552	2.09238	up	hsa_circRNA_104812	chr9	-	88307603	88327481	uc011ltd.2	AGTPBP1	CTGGCTCAGAGTCAAGATTATCTGCAATTATGAAATGAAGTAACTC	721	293	8.40701	7.34187	632	731	677	701	862	723	267	306	270	304	271	340	7.86289	8.42748	8.56478	8.36723	8.90023	8.31948	6.83445	7.68444	7.151	7.68444	6.80841	7.88848	hsa-miR-145-5p	hsa-miR-34a-5p	hsa-miR-449b-5p	hsa-miR-449a	hsa-miR-219a-1-3p
ASCRP005081	1.89e-09	2.51172	up	hsa_circRNA_104833	chr9	+	97535283	97563284	uc004auz.1	C9orf3	GGATGGCCAGGCCATGTGTTTATACTGTGGGATCTCCCATAAACAA	6498.83	2091.83	12.4524	11.1237	5972	6180	6598	6414	7048	6781	2035	1873	2107	2138	2249	2149	12.3008	12.4297	12.5726	12.4657	12.4851	12.4606	10.9956	10.9276	11.1315	11.1986	11.2483	11.2409	hsa-miR-298	hsa-miR-423-5p	hsa-miR-377-5p	hsa-miR-1301-3p	hsa-miR-320a
ASCRP003808	0.000295295	2.5048	up	hsa_circRNA_103510	chr3	+	170013698	170015181	uc003fgs.2	PRKCI	CCCGTTCTTCCGAAATGTTGATTGGGATATGTTATTTTGGAAAAAC	29900.5	9418.5	14.5833	13.2586	34203	39058	32571	22574	23544	27453	14321	13620	9869	6248	6952	5501	14.7175	14.9675	14.6609	14.3094	14.2666	14.5779	13.8762	13.8149	13.4876	12.7332	12.9685	12.6711	hsa-miR-589-3p	hsa-miR-144-5p	hsa-miR-670-5p	hsa-miR-600	hsa-miR-545-3p
ASCRP005073	3.055e-08	2.87301	up	hsa_circRNA_104824	chr9	+	96238537	96261168	uc004atx.3	FAM120A	CCACCACATTACTTAGGAAATCACATTCTGCCTGATGAAGATCTGG	910.167	297.167	8.95636	7.43379	966	925	907	888	924	851	312	297	305	295	301	273	8.92022	8.96012	9.15924	8.90501	9.04245	8.75112	7.44741	7.6033	7.57521	7.59928	7.25776	7.11979	hsa-miR-9-5p	hsa-miR-203a-3p	hsa-miR-26a-5p	hsa-miR-570-3p	hsa-miR-31-5p
ASCRP001673	1.29146e-06	4.14908	up	hsa_circRNA_101314	chr14	-	21698477	21702388	uc001vzw.3	HNRNPC	ATTATGATAGTTTTCGGCTTTGTGAGAAACCTTACCATCAAACACG	1015	279.833	9.23541	7.18262	967	1195	901	1023	963	1041	297	303	301	263	254	261	8.92345	9.67779	9.15048	9.23611	9.13656	9.28809	7.27184	7.65253	7.53364	7.20129	6.48177	6.95466	hsa-miR-889-3p	hsa-miR-329-3p	hsa-miR-708-5p	hsa-miR-588	hsa-miR-490-3p
ASCRP004828	1e-11	5.1892	up	hsa_circRNA_104575	chr8	+	27382878	27394372	uc003xfu.3	EPHX2	AAGCGATGAGGGCGGTGGCCAGTTTGAATACTCCCTTCATACCAGC	15881	2425.17	13.746	11.3705	15397	14659	15861	16045	17312	16012	2387	2310	2444	2535	2605	2270	13.658	13.5641	13.6756	13.8243	13.8912	13.8627	11.3235	11.2409	11.4099	11.4408	11.4779	11.3298	hsa-miR-519e-5p	hsa-miR-519d-5p	hsa-miR-200b-3p	hsa-miR-145-5p	hsa-miR-515-5p
ASCRP001470	0.000518641	3.37468	up	hsa_circRNA_101102	chr12	+	70193988	70195501	uc001svm.3	RAB3IP	GAGGACCAAAGCTGACTTATCCTTGTATAATGAATTCCGATTGTGG	735.833	253.167	8.47088	6.71613	755	671	735	730	790	734	241	247	278	277	206	270	8.29805	8.2246	8.77066	8.45344	8.7265	8.35204	6.34056	7.00561	7.26872	7.39087	5.20667	7.08435	hsa-miR-580-3p	hsa-miR-503-3p	hsa-miR-376a-2-5p	hsa-miR-141-5p	hsa-miR-589-3p
ASCRP005187	0.0274547	2.00257	up	hsa_circRNA_104940	chr9	+	134011326	134022971	uc004caf.1	NUP214	CTCTCCCCAGGGATTTAGTGCTGGCAGCATCTGCGGCTTCAACAGA	32512	13489.3	14.7061	13.7042	33229	46527	35164	23567	26912	29673	24534	19311	13486	4714	12971	5920	14.609	15.1942	14.8424	14.3631	14.51	14.7175	14.6261	14.298	14.0341	12.3602	14.1095	12.7973	hsa-miR-608	hsa-miR-185-3p	hsa-miR-653-3p	hsa-miR-377-5p	hsa-miR-298
ASCRP004960	2.659e-08	2.08494	up	hsa_circRNA_104708	chr8	-	141874410	141900868	uc003yvs.3	PTK2	CTATCAACAGAATATGACAGATACCTAGCATCTAGCAAAATAATGG	973.5	368.833	9.13542	8.07541	1028	945	929	991	951	997	371	404	360	350	359	369	9.13581	9.01483	9.19977	9.15196	9.11037	9.19977	7.96962	8.36212	8.04005	8.04507	7.9295	8.10612	hsa-miR-125a-3p	hsa-miR-134-5p	hsa-miR-301a-5p	hsa-miR-222-5p	hsa-miR-501-5p
ASCRP004959	1.77078e-05	2.11808	up	hsa_circRNA_104707	chr8	-	141856358	141900868	uc003yvs.3	PTK2	AAGTATTAGAAATATGACAGATACCTAGCATCTAGCAAAATAATGG	852	328.667	8.81174	7.72898	921	859	789	819	905	819	316	283	359	380	332	302	8.80587	8.76071	8.93123	8.73696	8.98596	8.6497	7.48414	7.47808	8.03204	8.23081	7.64535	7.50348	hsa-miR-301a-5p	hsa-miR-125a-3p	hsa-miR-134-5p	hsa-miR-222-5p	hsa-miR-501-5p
ASCRP000071	0	4.89692	up	hsa_circRNA_000585	chr14	-	20811305	20811534			AACAGACTCACGGCCAGCGAACTGAGTGCGTCCTGTCACTCCACTC	5765.17	986.667	12.2488	9.95693	5775	6170	5516	5812	6168	5150	1018	1008	966	1029	961	938	12.2399	12.4214	12.2399	12.2794	12.22	12.0923	9.99906	10.0457	9.92054	10.0177	9.86205	9.89658	hsa-miR-330-5p	hsa-miR-328-3p	hsa-miR-127-5p	hsa-miR-326	hsa-miR-615-5p
ASCRP004973	0	85.5071	up	hsa_circRNA_104722	chr8	-	145011146	145011239	uc003zab.1	PLEC	AATCATTCTGCACTTCCAGGTGAAGCTGGTGAACATCAGGAATGAT	825.833	186	8.7399	2.32193	793	918	804	812	813	815	198	180	198	183	186	171	8.41556	8.93319	8.9606	8.71051	8.78912	8.63041	2.32193	2.32193	2.32193	2.32193	2.32193	2.32193	hsa-miR-580-5p	hsa-miR-198	hsa-miR-656-5p	hsa-miR-219a-5p	hsa-miR-758-5p
ASCRP003024	0.00236933	6.19763	up	hsa_circRNA_102712	chr2	-	45773870	45780869	uc002rus.3	SRBD1	ATTATTTTGCACCACTGGATGTTGTTTACTGGTGGAGACCACGTAG	632.167	217	8.09433	5.46262	683	683	593	526	661	647	241	211	235	208	216	191	8.05573	8.26619	8.19331	7.60978	8.37558	8.06541	6.34056	6.19226	6.48781	5.8598	5.57334	2.32193	hsa-miR-545-3p	hsa-miR-15b-3p	hsa-miR-335-3p	hsa-miR-539-5p	hsa-miR-34b-5p
ASCRP004786	4.35e-09	4.87374	up	hsa_circRNA_104532	chr7	+	155465560	155473602	uc003wme.3	RBM33	TGAATTTACATGAACTTGAAGATGATTTACTTGGAGAAGATTTGCT	1394	312.167	9.87611	7.59108	1477	1487	1299	1305	1403	1393	318	283	340	325	328	279	10.0425	10.118	9.79583	9.78088	9.73746	9.78197	7.50679	7.47808	7.88949	7.86211	7.59369	7.21633	hsa-miR-578	hsa-miR-125b-5p	hsa-miR-26b-3p	hsa-miR-512-5p	hsa-miR-335-3p
ASCRP002394	8.1e-10	2.54374	up	hsa_circRNA_102059	chr17	-	37579579	37584043	uc002hru.2	MED1	ATTTTATGCTGTCATTTAATGAACCTGAAGTACTATGTCTCTCCTT	2076	663	10.6171	9.27017	1826	2056	1931	2047	2364	2232	637	593	695	683	734	636	10.4557	10.694	10.5482	10.6316	10.694	10.6793	9.16773	9.12272	9.35516	9.34716	9.40274	9.2255	hsa-miR-143-5p	hsa-miR-544a	hsa-miR-105-5p	hsa-miR-765	hsa-miR-371a-5p
ASCRP003838	5.65045e-05	3.50979	up	hsa_circRNA_103540	chr3	-	185638891	185641772	uc003fpu.3	TRA2B	GATCATACAGGCAAATCCTGATCCTAACTGTTGTCTTGGAGTATTT	755.667	253.167	8.5278	6.71642	665	699	733	725	866	846	261	205	261	248	320	224	7.99741	8.32717	8.75766	8.43965	8.90726	8.73766	6.73016	5.99054	7.00934	6.95853	7.49884	6.1111	hsa-let-7a-3p	hsa-miR-98-3p	hsa-let-7f-1-3p	hsa-miR-96-5p	hsa-let-7b-3p
ASCRP005014	1.10103e-06	3.02965	up	hsa_circRNA_104764	chr9	-	33960823	33963789	uc003ztr.2	UBAP2	CTGGACTGAAGATAACTGGCATCAAATACTCACAACATAGCTCAGG	681.833	247.167	8.28452	6.68537	734	693	639	676	756	593	244	215	248	238	269	269	8.237	8.30776	8.40194	8.27243	8.64174	7.84626	6.41501	6.32265	6.77641	6.75598	6.77476	7.06742	hsa-miR-627-5p
ASCRP000658	8.35e-09	2.04724	up	hsa_circRNA_100270	chr1	-	85403437	85418213	uc001dkm.3	MCOLN2	CCATGACAAGATTGTGTTCAATTAGACCTTCAGGACCTCTCCAAGA	2508.67	953.833	10.9317	9.89804	2496	2256	2290	2394	2990	2626	898	899	887	993	1116	930	10.931	10.8509	10.8302	10.9094	11.0989	10.9698	9.80876	9.90042	9.76963	9.95037	10.0762	9.88283	hsa-miR-577	hsa-miR-622	hsa-miR-153-5p	hsa-miR-34a-3p	hsa-miR-377-3p
ASCRP002069	0.0028518	2.53227	up	hsa_circRNA_101722	chr16	+	16146580	16150152	uc021tdq.1	ABCC1	GCCCTTTCTGAATCTGGGCCCTTCCGTCCTGGCTGGAGTGGCGGTG	5751.83	1916.5	12.1765	10.8361	8088	8552	4156	4912	4765	4038	1980	3318	1063	2046	1191	1901	12.8342	12.912	11.7834	12.073	11.8036	11.6528	10.9386	11.6934	10.0498	11.111	10.1589	11.0647	hsa-miR-634	hsa-miR-511-5p	hsa-miR-660-3p	hsa-miR-134-3p	hsa-miR-580-3p
ASCRP004902	6.1e-10	8.23176	up	hsa_circRNA_104649	chr8	-	95518727	95524317	uc003ygo.2	KIAA1429	ATTTAAAAAGAATATCGATAACTTGATGACCCCAGAAGGAGTTGGC	4126.33	487.5	11.7492	8.70803	3741	3482	4278	4425	3867	4965	462	533	429	532	432	537	11.5856	11.5572	11.8407	11.9231	11.5383	12.0504	8.51947	8.90023	8.47065	8.92221	8.46794	8.9677	hsa-miR-302b-5p	hsa-miR-302c-5p	hsa-miR-302d-5p	hsa-miR-452-5p	hsa-miR-545-5p
ASCRP000765	1.25599e-06	6.26673	up	hsa_circRNA_100380	chr1	+	167921037	167944253	uc001gev.3	DCAF6	GCCAATTTACGTGTCATTATGGAACTACTTATGAGGAAGAAGAGAA	1037.83	248	9.29448	6.64677	1036	1219	981	1029	927	1035	259	285	234	247	220	243	9.16396	9.71596	9.30558	9.24881	9.05268	9.2799	6.70215	7.4985	6.46554	6.93121	5.70016	6.58306	hsa-miR-525-5p	hsa-miR-544a	hsa-miR-345-3p	hsa-miR-577	hsa-miR-587
ASCRP003949	0.00522718	2.36528	up	hsa_circRNA_103655	chr4	-	73956383	73958017	uc003hgr.3	ANKRD17	ACCTGCTCCAAGTCCCTCAGGGGTGGCACTGAATCAACAAGACAAG	1748.17	558.333	10.1641	8.9221	2637	2464	1517	1162	1603	1106	640	849	416	514	475	456	11.0286	10.9772	10.1032	9.52975	9.9483	9.39758	9.18022	9.7708	8.38603	8.87126	8.69101	8.63329	hsa-miR-766-5p	hsa-miR-298	hsa-miR-323a-5p	hsa-miR-138-5p	hsa-miR-486-3p
ASCRP004291	4.84848e-05	2.2653	up	hsa_circRNA_104016	chr5	+	172336669	172341841	uc003mby.4	ERGIC1	CATCAACAAGTGTGAACGAGCTCTATGTCGATGACCCAGACAAGGA	588.833	249.833	7.89142	6.71172	628	639	541	547	565	613	239	252	250	238	294	226	7.84574	8.07925	7.85148	7.71652	7.92925	7.92629	6.28614	7.10108	6.80787	6.75598	7.15269	6.16655	hsa-miR-596	hsa-miR-324-3p	hsa-miR-636	hsa-miR-494-5p	hsa-miR-1271-3p
ASCRP000601	3.6625e-07	3.47958	up	hsa_circRNA_100213	chr1	-	47745912	47748131	uc010omn.1	STIL	ACTACTTCAGGCACAGGTCTTCCCAAAAGTTATCTTCTGGGAAGAT	18765.2	4260.5	13.9393	12.1404	21101	18942	21354	16177	18189	16828	5573	5451	4316	3673	4013	2537	13.9824	13.8243	14.078	13.8396	13.967	13.9444	12.4927	12.4657	12.2117	12.0024	12.1679	11.502	hsa-miR-345-5p	hsa-miR-29b-1-5p	hsa-miR-34a-5p	hsa-miR-134-3p	hsa-miR-892a
ASCRP002399	0	339.852	up	hsa_circRNA_102064	chr17	+	37880978	37882106	uc010cwa.3	ERBB2	TGTCTACATGATCATGGTCAAATGAAGCATACGTGATGGCTGGTGT	2225	176.5	10.7307	2.32193	2324	2332	2193	2219	2089	2193	181	179	151	164	190	194	10.8249	10.9044	10.7659	10.7763	10.4565	10.6563	2.32193	2.32193	2.32193	2.32193	2.32193	2.32193	hsa-miR-769-3p	hsa-miR-762	hsa-miR-92a-1-5p	hsa-miR-214-3p	hsa-miR-761
ASCRP001089	1.344e-08	3.14907	up	hsa_circRNA_100715	chr10	-	126727565	126727724	uc001lif.4	CTBP2	ATTTGTGAAGGGTTCATAGTGGCGTCATGCACGCAGACTCCTGCAA	865.5	278	8.85634	7.20142	925	900	772	801	898	897	265	267	284	270	290	292	8.81791	8.88047	8.88047	8.68401	8.97118	8.904	6.79277	7.28114	7.34428	7.30415	7.09494	7.39123	hsa-miR-2113	hsa-miR-218-5p	hsa-miR-365b-5p	hsa-miR-383-5p	hsa-miR-570-5p
ASCRP004872	5.89e-09	2.18	up	hsa_circRNA_104619	chr8	-	48817428	48842572	uc003xqi.3	PRKDC	CTAGAAGCTATATTGAGAGATTCTCCCTGAGAAACAAGCAGAATTT	1880.33	680.5	10.4458	9.32143	1636	1735	1955	1697	2200	2059	714	616	687	674	728	664	10.2673	10.381	10.5816	10.3307	10.5723	10.5417	9.37404	9.20161	9.33585	9.33017	9.39491	9.29203	hsa-miR-452-3p	hsa-miR-506-5p	hsa-miR-873-5p	hsa-miR-302d-5p	hsa-miR-302b-5p
ASCRP003787	7.02903e-06	2.40203	up	hsa_circRNA_103489	chr3	+	149563797	149613347	uc003exn.4	RNF13	ATTAGCATGGGATCCAACGACAGTGATTTTACAACGAGATGCTGCT	865.667	311.5	8.83494	7.57069	853	949	924	809	850	809	345	325	303	315	294	287	8.61991	9.02479	9.19362	8.6974	8.86586	8.60809	7.769	7.8305	7.55298	7.78544	7.15269	7.33351	hsa-miR-654-3p	hsa-miR-511-5p	hsa-miR-632	hsa-miR-643	hsa-miR-889-5p
ASCRP000636	0.000199424	2.34276	up	hsa_circRNA_100248	chr1	+	62907158	62908990	uc001daj.2	USP1	ACACACTGAGTGATCAAGTTGTTCCTGCAGCACAGTCTTCACCTAT	924.833	325.833	8.95984	7.73164	798	793	786	926	1108	1138	339	253	317	340	376	330	8.43062	8.58949	8.91886	9.01483	9.3613	9.44398	7.71223	7.11589	7.69435	7.97129	8.09868	7.79738	hsa-miR-103a-2-5p	hsa-miR-520a-3p	hsa-miR-520c-3p	hsa-miR-520b	hsa-miR-302d-3p
ASCRP000684	0.00177526	2.14649	up	hsa_circRNA_100297	chr1	+	113192039	113202401	uc001ecj.1	CAPZA1	TAAGATTCAGACGTTCGGCTACTACTTAATAATGACAATCTCCTCA	923.167	344.167	8.95017	7.84819	955	729	813	776	1241	1025	326	266	353	312	483	325	8.88937	8.41978	8.97763	8.61578	9.53649	9.26199	7.58714	7.26833	7.98986	7.76403	8.72465	7.75515	hsa-miR-103a-2-5p	hsa-miR-637	hsa-miR-515-5p	hsa-miR-513a-5p	hsa-miR-519e-5p
ASCRP002438	1.52191e-05	2.29845	up	hsa_circRNA_102105	chr17	+	45668082	45669911	uc002ilr.4	NPEPPS	GCTGCCACAGGAATGGTGGACTCATCTTTGGTTAAATGAAGGTTTT	778.5	293.667	8.60353	7.40287	703	761	730	730	860	887	298	265	265	293	319	322	8.12519	8.52094	8.74497	8.45344	8.89746	8.8792	7.28307	7.25776	7.08833	7.57427	7.48615	7.72763	hsa-miR-34a-3p	hsa-miR-564	hsa-miR-761	hsa-miR-502-3p	hsa-miR-432-3p
ASCRP002503	5.82489e-05	2.92673	up	hsa_circRNA_102171	chr17	-	62587201	62594608	uc002jep.1	SMURF2	ACAGATAGTAGGACTTCCTGATCCATTTGCTAAGGTGGTGGTTGAT	1687	487.333	10.2102	8.66094	1312	1812	1490	2008	1594	1906	365	430	449	662	466	552	9.79041	10.4705	10.0843	10.6093	9.93436	10.3725	7.92703	8.48482	8.59011	9.30501	8.6443	9.01436	hsa-miR-539-5p	hsa-let-7f-2-3p	hsa-miR-216a-3p	hsa-miR-578	hsa-miR-587
ASCRP004983	0.000332183	2.03792	up	hsa_circRNA_104733	chr9	+	6420911	6434173	uc003zjy.3	UHRF2	AGTATGATGATTGGAAAATGGATATACCTTATTTGATTATGATGTT	622.5	268	8.06168	7.03459	564	605	623	619	651	673	276	239	271	290	294	238	7.52779	7.94884	8.34021	8.0478	8.34392	8.16154	7.00233	6.8688	7.17033	7.54785	7.15269	6.46554	hsa-miR-218-5p	hsa-miR-183-3p	hsa-miR-134-5p	hsa-miR-424-5p	hsa-miR-382-3p
ASCRP002062	0.00592851	2.21172	up	hsa_circRNA_101715	chr16	+	14738130	14738466	uc002dco.3	BFAR	TTCTCCTCAGATTAATGATGTTTTGCAGCAGTTTTCTACGTCTGAA	2060.17	810.167	10.5828	9.43759	2214	2357	1821	2126	1951	1892	621	1672	544	858	449	717	10.7461	10.9137	10.4394	10.7181	10.3214	10.3579	9.12164	10.7763	8.98275	9.73985	8.5624	9.44268	hsa-miR-627-3p	hsa-miR-449c-5p	hsa-miR-450a-2-3p	hsa-miR-23a-5p	hsa-miR-20a-3p
ASCRP003245	3.30744e-06	3.50127	up	hsa_circRNA_102938	chr2	-	230666967	230672580	uc002vpw.1	TRIP12	GCCCTCAAGGTGAACTTATGCCATGTTTACCAAAAGAAGGCATTTT	985.667	288.167	9.13346	7.32559	1155	1077	1130	822	943	787	324	265	310	268	282	280	9.50291	9.41265	9.51693	8.74651	9.0922	8.52959	7.56541	7.25776	7.62722	7.27727	6.99386	7.232	hsa-miR-370-3p	hsa-miR-93-3p	hsa-miR-146a-3p	hsa-miR-494-5p	hsa-miR-767-5p
ASCRP003063	0.00146097	3.00336	up	hsa_circRNA_102751	chr2	+	69304539	69318051	uc002sfd.2	ANTXR1	TGTGCAGGAGCTGGCCCGGATTGCGGACAGTAAGGATCATGTGTTT	848.333	288.333	8.79	7.20343	997	1091	863	673	727	739	357	324	284	268	222	275	9.01599	9.4555	9.08115	8.25954	8.56573	8.36212	7.85901	7.82043	7.34428	7.27727	5.7635	7.15607	hsa-miR-382-3p	hsa-miR-532-5p	hsa-miR-432-3p	hsa-miR-218-2-3p	hsa-miR-623
ASCRP000645	2.86945e-05	2.10304	up	hsa_circRNA_100257	chr1	+	65830317	65831879	uc001dcc.1	DNAJC6	ATCGAACTGCCAAGTTTCACAGCCGGGTGCCTCATCTCCAGACATG	5301.17	2036.83	12.1343	11.0619	6267	4811	5270	4748	5427	5284	2294	1571	2406	1592	2491	1867	12.4297	12.0504	12.1227	12.0364	12.0107	12.1563	11.2314	10.6824	11.3726	10.6654	11.4002	11.0194	hsa-miR-508-3p	hsa-miR-542-3p	hsa-miR-516b-5p	hsa-miR-518e-5p	hsa-miR-522-5p
ASCRP004904	0	45.5821	up	hsa_circRNA_104651	chr8	+	95676924	95677424	uc003ygq.4	ESRP1	ATTGCTGGTGCAGCAAGATGGAACTTATTGATGATAACACCGTAGT	573.833	161.667	7.83232	2.32193	659	582	558	571	538	535	161	154	149	148	177	181	7.97321	7.84705	7.97129	7.84051	7.76292	7.59897	2.32193	2.32193	2.32193	2.32193	2.32193	2.32193	hsa-miR-520g-3p	hsa-miR-520h	hsa-miR-302a-3p	hsa-miR-93-5p	hsa-miR-372-3p
ASCRP003746	0.000856759	2.08806	up	hsa_circRNA_103448	chr3	+	122842912	122843190	uc003egc.2	PDIA5	GGCTGAAGAAGTGCTGGCCGGGATGAATGTCTACTCCTCTGAATTT	716	288.167	8.3658	7.30364	746	711	551	658	817	813	277	274	243	255	352	328	8.27398	8.36212	7.93245	8.20354	8.80022	8.6225	7.01354	7.38045	6.68473	7.0945	7.86701	7.78162	hsa-miR-491-5p	hsa-miR-607	hsa-miR-373-5p	hsa-miR-92a-2-5p	hsa-miR-671-5p
ASCRP003221	8.365e-08	4.8194	up	hsa_circRNA_102913	chr2	+	216177220	216190861	uc002vex.4	ATIC	TTAGCCTTGAAGCCTTATTTAGTGTCTCTGACAAAACCGGCCTTGT	1968.83	388.667	10.4807	8.21183	2385	2435	1965	1617	1855	1556	407	393	413	365	396	358	10.8698	10.9566	10.5981	10.2583	10.211	9.99028	8.20884	8.28327	8.3665	8.13805	8.24574	8.02859	hsa-miR-551b-5p	hsa-miR-338-3p	hsa-miR-205-3p	hsa-miR-103a-3p	hsa-miR-107
ASCRP002404	2.4784e-07	3.63004	up	hsa_circRNA_102069	chr17	-	39983677	39983878	uc002hxy.4	NT5C3L	AAATTGGCTTCCTGAATGACAAGGGTTTTCTCCAGGGATTTAAGGG	1438	371.5	9.92007	8.06009	1350	1179	1434	1431	1724	1510	363	401	328	402	328	407	9.85506	9.65112	10.0036	9.99906	10.0829	9.9287	7.91138	8.3378	7.78544	8.37449	7.59369	8.35773	hsa-miR-761	hsa-miR-450a-1-3p	hsa-miR-19a-5p	hsa-miR-580-3p	hsa-miR-544a
ASCRP004283	0.00121946	2.30274	up	hsa_circRNA_104003	chr5	-	168110970	168112932	uc003mab.3	SLIT3	GAGTTCCCCTCCAACCACAGTGTACAGTGGACCCTTCTGTGAACAC	33577.5	11692.3	14.7908	13.5875	36032	36267	34841	24146	37884	32295	19420	12981	14730	6890	10225	5908	14.8277	14.8424	14.8277	14.4003	14.9675	14.8794	14.298	13.7482	14.1976	12.9201	13.5739	12.7873	hsa-miR-654-5p	hsa-miR-541-3p	hsa-miR-25-5p	hsa-miR-584-3p	hsa-miR-661
ASCRP000950	2e-10	2.94486	up	hsa_circRNA_100571	chr10	+	27024168	27024508	uc001isv.3	PDSS1	TGTTTGCCTGTCAGCAGGTCTCTGTTCTAGGATGTCCCGACCCAGT	18919.5	4976	13.9411	12.3829	19974	18313	20940	18286	20041	15963	5260	5193	5145	5161	4969	4128	13.9106	13.7792	14.0428	13.9546	14.1095	13.8497	12.394	12.4071	12.4297	12.4606	12.394	12.2117	hsa-miR-488-3p	hsa-miR-155-3p	hsa-miR-153-5p	hsa-miR-589-3p	hsa-miR-26a-2-3p
ASCRP001348	2.55362e-05	2.15421	up	hsa_circRNA_100977	chr11	+	120347369	120348235	uc001pxl.2	ARHGEF12	CAGAGTCCAGATAACAAAGCTTTATTCGTCATTTCCATGTCAGACA	594	253.833	7.92408	6.81693	610	608	533	606	615	592	238	232	273	253	277	250	7.76569	7.95806	7.78544	7.99104	8.20273	7.84155	6.25814	6.71365	7.20903	7.06338	6.91536	6.74201	hsa-miR-103a-2-5p	hsa-miR-335-3p	hsa-miR-130b-5p	hsa-miR-339-3p	hsa-miR-605-5p
ASCRP002193	6.978e-08	3.32125	up	hsa_circRNA_101850	chr16	+	69189773	69201088	uc002ews.4	CIRH1A	GATATATAAGGGTCCTGAGAACATTATCTGTAGCTGTATCTCCCCA	21137.8	4877.33	14.0914	12.3597	19260	21210	19851	21780	20876	23850	4157	4311	4849	4987	5852	5108	13.8396	14.0196	13.9546	14.2101	14.1525	14.3721	12.081	12.0923	12.3458	12.4376	12.6568	12.5447	hsa-miR-127-5p	hsa-miR-449a	hsa-miR-449b-5p	hsa-miR-34c-5p	hsa-miR-378a-5p
ASCRP005099	1.5e-10	4.75173	up	hsa_circRNA_104852	chr9	+	110064315	110068928	uc011lwa.2	RAD23B	CAACTGACAGGCAAAATCCTCAATGATGATACTGCTCTCAAAGAAT	3985.5	723.833	11.6717	9.42322	4338	4043	4044	3813	4152	3523	773	667	723	703	858	619	11.806	11.761	11.7384	11.6528	11.6528	11.4191	9.5115	9.35489	9.42818	9.40912	9.65478	9.18084	hsa-miR-138-5p	hsa-miR-325	hsa-miR-593-3p	hsa-miR-512-3p	hsa-miR-766-5p
ASCRP003688	0.000849836	3.27462	up	hsa_circRNA_103390	chr3	-	52960046	52962357	uc010hmr.3	SFMBT1	CTTCCCTCCGGTTTTTGATGAGAAGTACTTTCTGGTGGAAATGGAT	16952.5	3760	13.5814	11.8701	31008	24865	16685	7566	10616	10975	5859	5978	3248	2223	2425	2827	14.51	14.1976	13.7244	12.7453	13.0881	13.2233	12.5527	12.5726	11.8175	11.2519	11.3461	11.6799	hsa-miR-891a-3p	hsa-let-7g-5p	hsa-miR-203a-5p	hsa-let-7b-5p	hsa-miR-98-5p
ASCRP002740	3.4841e-07	4.4342	up	hsa_circRNA_102421	chr19	+	5016267	5047680	uc002mbq.4	KDM4B	ACTTTGGGGAGCCTAAGTCCTGGAACCATCACTGTTGCTGGAGGCA	1427.5	336	9.92485	7.77618	1598	1573	1334	1325	1385	1350	399	337	297	312	296	375	10.2052	10.2171	9.85506	9.81638	9.7126	9.7428	8.14868	7.92999	7.48749	7.76403	7.17948	8.14741	hsa-miR-598-3p	hsa-miR-197-3p	hsa-miR-524-5p	hsa-miR-542-5p	hsa-miR-154-3p
ASCRP003344	3.2983e-07	4.53979	up	hsa_circRNA_103038	chr20	-	33866724	33872064	uc002xbv.1	EIF6	AAAGTGCAGTTCCCTCCGGTGTGTTCGAGGGCGAGCTCTCCGATAC	19103.3	3337.5	13.9425	11.7599	24503	22279	16471	15882	16505	18980	4624	4737	2737	2985	2275	2667	14.1781	14.078	13.7148	13.7926	13.7926	14.0989	12.2451	12.2631	11.5492	11.6554	11.2609	11.5856	hsa-miR-665	hsa-miR-485-5p	hsa-miR-501-3p	hsa-miR-377-5p	hsa-miR-608
ASCRP004599	1.37e-09	3.12355	up	hsa_circRNA_104336	chr7	-	27668989	27672064	uc003szg.3	HIBADH	GTTTCTGGTGGTAGTATCTTCCCCAGCAGATGTTGCTGAAAAAGCT	8126.33	2151.17	12.7887	11.1455	8454	8180	8350	7324	8704	7746	2244	2671	2229	1858	1958	1947	12.8715	12.8632	12.8285	12.6914	12.8063	12.6711	11.1866	11.4136	11.2314	10.931	11.0114	11.0989	hsa-miR-302b-3p	hsa-miR-107	hsa-miR-103a-3p	hsa-miR-33b-5p	hsa-miR-654-5p
ASCRP000350	3e-11	2.41749	up	hsa_circRNA_001914	chr19	+	15510546	15510663			TTTGCTGTTAGGTACCTGCTGGCGCTCATCACTCAGGTGGTGGGAT	3106.83	1021.17	11.2827	10.0092	2939	2853	3141	2885	3443	3380	1054	956	997	1064	1078	978	11.1889	11.2032	11.3662	11.2104	11.3572	11.3704	10.0605	9.97064	9.97567	10.0702	10.017	9.96127	hsa-miR-612	hsa-miR-214-3p	hsa-miR-608	hsa-miR-194-5p	hsa-miR-654-5p
ASCRP002617	2.05123e-05	2.06099	up	hsa_circRNA_102298	chr18	-	9588086	9588851	uc002kod.1	PPP4R1	AATGATGATGTGAAAACAGAAGCTGTGGCTAACCAACTGTGAGAGC	889	339.333	8.89516	7.85182	995	884	907	803	941	804	328	341	354	324	387	302	9.00691	8.83697	9.15924	8.69101	9.08425	8.59261	7.60763	7.95806	8.00116	7.85616	8.18445	7.50348	hsa-miR-598-3p	hsa-miR-670-3p	hsa-miR-556-5p	hsa-miR-185-3p	hsa-miR-502-5p
ASCRP004721	1.46959e-05	2.10463	up	hsa_circRNA_104467	chr7	+	127361340	127361454	uc010lle.3	SND1	GAACACCCAGGTGATGCAGGTTCTGAATGCTGATGCCATTGTTGTG	792.833	309.667	8.64888	7.57532	820	855	766	736	775	805	303	279	304	328	364	280	8.50663	8.75405	8.86224	8.47758	8.69522	8.59758	7.34834	7.43114	7.56541	7.88848	7.98654	7.232	hsa-miR-125a-3p	hsa-miR-552-3p	hsa-miR-105-3p	hsa-miR-766-3p	hsa-miR-323a-5p
ASCRP002219	0.00120116	3.18116	up	hsa_circRNA_101877	chr16	-	74670243	74671868	uc002fda.3	RFWD3	CTCTTTTCTTCCAGTTCCCTACTGAAGGAACAGATGCTAAGGAAAC	11503.3	3090.83	13.1827	11.5131	12443	17469	5759	10561	12858	9930	2565	5815	1636	3606	1481	3442	13.3911	13.7148	12.3295	13.2233	13.4045	13.0328	11.3944	12.5385	10.7114	11.9728	10.53	11.9315	hsa-miR-449c-5p	hsa-miR-27a-3p	hsa-miR-27b-3p	hsa-miR-887-5p	hsa-miR-636
ASCRP004550	2.70504e-06	2.15603	up	hsa_circRNA_104285	chr7	+	888054	905704	uc003sjg.3	SUN1	GGTCATCCAGGCGGTGCGTCTTTCTACGTGAATAGGATTTTGTGGC	1446.83	519.5	9.93653	8.82815	1375	1362	1369	1358	1723	1494	492	560	424	593	472	576	9.88906	9.96608	9.90187	9.88569	10.0811	9.89538	8.66251	9.01309	8.4334	9.10514	8.6705	9.08425	hsa-miR-301a-5p	hsa-miR-525-5p	hsa-miR-589-5p	hsa-miR-520a-5p	hsa-miR-1301-3p
ASCRP004898	5.129e-08	2.13594	up	hsa_circRNA_104645	chr8	-	74585341	74601048	uc003xzm.3	STAU2	ATTACAACTTTCGGGGCATGTACAATCAGAGATGTTCTCAGTGCAG	754.333	297.333	8.5419	7.44703	774	764	707	775	704	802	316	267	288	287	306	320	8.35773	8.526	8.66637	8.61209	8.50663	8.58261	7.48414	7.28114	7.38549	7.51339	7.32079	7.69725	hsa-miR-450a-1-3p	hsa-miR-654-3p	hsa-miR-103a-2-5p	hsa-miR-484	hsa-miR-657
ASCRP003281	4.92851e-05	2.1452	up	hsa_circRNA_102974	chr2	+	242374376	242375953	uc002wbi.2	FARP2	GACCTACCAAAACAGTGGAAGAACTCAGAAACAACTAGTAGATTAT	943.333	355.833	9.0499	7.94878	1101	999	977	824	919	840	404	383	343	363	345	297	9.33119	9.18022	9.29261	8.75056	9.02928	8.71553	8.19002	8.22399	7.91462	8.12433	7.78544	7.45429	hsa-miR-431-5p	hsa-miR-17-3p	hsa-miR-515-3p	hsa-miR-511-5p	hsa-miR-205-5p
ASCRP000832	1.8382e-07	2.21315	up	hsa_circRNA_100449	chr1	+	213302869	213349835	uc001hkd.3	RPS6KC1	TGATTGACAAGGCTTCTCCAGTGACAGTGATCTGGTATCTCTTACT	1584.33	562.667	10.1249	8.97884	1614	1534	1565	1506	1769	1518	608	515	594	573	628	458	10.224	10.1779	10.1542	10.1217	10.1305	9.94135	9.08115	8.83512	9.10906	9.04564	9.16197	8.64009	hsa-miR-22-5p	hsa-miR-146a-3p	hsa-miR-19a-5p	hsa-miR-515-5p	hsa-miR-30c-1-3p
ASCRP000027	3.54912e-06	2.32244	up	hsa_circRNA_000274	chr19	-	19760861	19761115			GGGTAGGGAGGTGAGGGCCTGGTGTGGGGTTTCCCAAGGAGAGCGC	6432.5	2257	12.4267	11.211	6467	6919	5653	5905	6526	7125	1930	2594	1718	2392	2277	2631	12.5161	12.5648	12.2897	12.3142	12.3368	12.5385	10.9044	11.3704	10.7903	11.3704	11.2661	11.5646	hsa-miR-661	hsa-miR-612	hsa-miR-665	hsa-miR-491-3p	hsa-miR-490-3p
ASCRP003789	0.000195778	2.16623	up	hsa_circRNA_103491	chr3	+	149563797	149629870	uc003exn.4	RNF13	ATAGTCATTTTCATGGTGATTTTACAACGAGATGCTGCTCTCCATA	2770.83	964.833	11.0278	9.91265	2866	3065	2862	3050	3122	1660	836	920	960	1063	1053	957	11.1602	11.2929	11.1788	11.2929	11.1401	10.1021	9.65813	9.93264	9.90983	10.0682	9.97996	9.92716	hsa-miR-654-3p	hsa-miR-7-5p	hsa-miR-511-5p	hsa-miR-632	hsa-miR-643
ASCRP003785	1.44427e-05	2.05457	up	hsa_circRNA_103487	chr3	+	149563797	149570383	uc003exn.4	RNF13	TCCAGCTGAAGGTTTAAAGGTGATTTTACAACGAGATGCTGCTCTC	760.5	302.167	8.53889	7.50006	711	825	693	743	823	768	306	285	300	257	335	330	8.15333	8.67109	8.63041	8.50249	8.81471	8.4613	7.38189	7.4985	7.51995	7.12755	7.67506	7.79738	hsa-miR-654-3p	hsa-miR-632	hsa-miR-324-5p	hsa-miR-431-5p	hsa-miR-708-5p
ASCRP004093	1.1658e-07	2.48641	up	hsa_circRNA_103803	chr5	-	16758226	16764505	uc010itx.3	MYO10	TACAGTCAGCTCACAGTTCAAGGCAGTAGACAGCAGGGACTCCCTG	3610.5	1158.17	11.509	10.1949	3558	3302	3898	3511	3653	3741	1087	1054	1381	1017	1408	1002	11.5075	11.4218	11.6799	11.4779	11.4545	11.5124	10.0918	10.1157	10.4824	9.98803	10.4781	10.0135	hsa-miR-520g-3p	hsa-miR-520h	hsa-miR-519e-5p	hsa-miR-515-5p	hsa-miR-22-5p
ASCRP004018	4.64135e-05	3.16022	down	hsa_circRNA_103727	chr4	-	120460114	120488299	uc003idf.3	PDE5A	GTCGTTAGCGGTTGTTGGTGTAGCCCAGGCCATCAACAAGAAATCA	518.667	636.167	7.5137	9.17373	481	585	582	530	484	450	726	809	658	516	671	437	7.05526	7.85823	8.12605	7.63025	7.379	7.0334	9.40416	9.68555	9.266	8.87715	9.26278	8.54673	hsa-miR-29b-1-5p	hsa-miR-153-5p	hsa-miR-29a-5p	hsa-miR-424-5p	hsa-miR-576-5p
ASCRP002009	0.000518511	2.81427	down	hsa_circRNA_101661	chr15	+	101550654	101551042	uc002bwr.3	LRRK1	CTGCCCTTTGGCTACTTGAAATTGACATTTCCAGCAACAAGTTGTC	1963.17	3710	10.4096	11.9024	3338	1995	1945	1513	1645	1343	5275	4646	4060	3427	2353	2499	11.379	10.6404	10.5675	10.1263	10.0057	9.73865	12.4071	12.2242	12.1138	11.8855	11.3145	11.469	hsa-miR-223-3p	hsa-miR-875-3p	hsa-miR-148b-5p	hsa-miR-92a-2-5p	hsa-miR-665
ASCRP001021	0.000168878	2.59995	down	hsa_circRNA_100647	chr10	+	94653105	94679807	uc009xub.3	EXOC6	TTCTGTTTTGGTCTGTGTATGATGACCAACCAAATGCGCACAAGAA	484.333	465.333	7.20761	8.58609	643	509	456	474	399	425	474	611	410	484	394	419	7.90513	7.46521	7.17699	7.28114	6.57173	6.84547	8.57789	9.18084	8.34595	8.75182	8.23101	8.42905	hsa-miR-33a-3p	hsa-miR-582-5p	hsa-miR-587	hsa-miR-877-3p	hsa-miR-544a
ASCRP000414	7.504e-08	3.17012	down	hsa_circRNA_100024	chr1	-	6021853	6029319	uc001als.2	NPHP4	GCTCATGGAGAATCCGCCCTTGTATTTTCACACATCCCTAAACCAC	662.833	946	8.21858	9.88312	706	657	655	625	739	595	996	814	920	925	1025	996	8.13527	8.16553	8.47859	8.0797	8.59572	7.85667	9.97064	9.69914	9.83394	9.84986	9.93792	10.0072	hsa-miR-637	hsa-miR-597-3p	hsa-miR-204-3p	hsa-miR-342-5p	hsa-miR-509-5p
ASCRP003701	1.0202e-07	2.29121	down	hsa_circRNA_103403	chr3	+	58131647	58135954	uc003djj.2	FLNB	TGAAAATCCCAGAGAGCCCACTCCAGTTCTACGTGAACTACCCCAA	1119.5	1561.67	9.45191	10.648	1126	1095	983	1262	976	1275	1595	1597	1507	1514	1711	1446	9.42294	9.4775	9.30938	9.7126	9.1606	9.62844	10.6719	10.7114	10.5675	10.5931	10.7659	10.5783	hsa-miR-588	hsa-miR-370-5p	hsa-miR-501-5p	hsa-miR-656-5p	hsa-miR-215-3p
ASCRP000278	0.00809684	2.22581	down	hsa_circRNA_001459	chr11	-	47379617	47379952			AGCATGTATGTGTATATGTGAGCAGCTGTGCACGTATGATGTCAGT	615	567.667	7.82728	8.98161	804	845	527	641	458	415	621	716	590	418	619	442	8.4572	8.73046	7.74089	8.1389	7.14081	6.75542	9.12164	9.48792	9.10055	8.46267	9.13901	8.57789	hsa-miR-377-3p	hsa-miR-342-3p	hsa-miR-362-3p	hsa-miR-329-3p	hsa-miR-767-3p
ASCRP002246	3.03745e-06	2.33798	down	hsa_circRNA_101904	chr16	+	88066714	88071617	uc002fkp.3	BANP	GGACGGTCAGAGCCGATGATGAGCACCCCACCTCCTGCCAGCGAGC	4454.67	7726.33	11.834	13.0592	3254	4020	4419	4720	5357	4958	8257	6748	8383	7442	8711	6817	11.3421	11.7384	11.8922	12.0256	11.9692	12.0364	13.1283	12.7973	13.1363	13.0215	13.3312	12.9407	hsa-miR-500a-3p	hsa-miR-604	hsa-miR-557	hsa-miR-377-5p	hsa-miR-210-3p
ASCRP000459	4.29268e-06	2.1937	down	hsa_circRNA_100069	chr1	+	16046228	16047883	uc010obo.2	PLEKHM2	ACAGACTGGGAAGGATGCCCCTTACCTAGACCTGGCCCCCTACATG	1363.5	1889.67	9.81725	10.9506	1343	1123	1317	1429	1523	1446	1873	1352	2044	1887	2182	2000	9.83966	9.53649	9.83322	9.99311	9.86134	9.83966	10.8459	10.4587	11.0732	10.9872	11.1986	11.1401	hsa-miR-219a-1-3p	hsa-miR-215-3p	hsa-miR-204-3p	hsa-miR-875-3p	hsa-miR-500a-5p
ASCRP000717	0.00375283	2.46294	down	hsa_circRNA_100332	chr1	+	151206672	151212515	uc021oyo.1	PIP5K1A	GTATTTAAGAAGATTCCCTAACCTCAACCAGAACCCTCGGACTTTG	739.667	808.833	8.32137	9.62175	676	451	824	621	1089	777	898	660	856	709	897	833	8.03135	7.00514	9.00187	8.05934	9.33585	8.49468	9.80876	9.33017	9.70426	9.42373	9.73746	9.72614	hsa-miR-892a	hsa-miR-216a-3p	hsa-miR-302c-3p	hsa-miR-493-5p	hsa-miR-200c-5p
ASCRP001547	6.5882e-07	2.08616	down	hsa_circRNA_101184	chr12	+	121659715	121659969	uc001tzr.3	P2RX4	CACAGCAACGGAGGAAAACTCCCTCTTCGTCATGACCAACGTGATC	704.667	717.5	8.35848	9.41934	759	632	629	801	614	793	702	666	722	729	765	721	8.3089	8.05369	8.35956	8.68401	8.19577	8.54898	9.35489	9.34928	9.42294	9.46972	9.46429	9.4549	hsa-miR-216a-3p	hsa-miR-29b-1-5p	hsa-miR-34c-5p	hsa-miR-29a-5p	hsa-miR-659-3p
ASCRP002772	1.73939e-05	5.05932	down	hsa_circRNA_102454	chr19	+	11657489	11657784	uc002msc.1	CNN1	GGCCAGCATGATTCATCAATAAGCTGCAGCCAGGCTCCGTGAAGAA	391.333	458	6.26977	8.60872	358	366	428	388	435	373	501	402	491	455	458	441	5.13834	5.61441	6.90135	6.62751	6.93121	6.40582	8.71824	8.34558	8.77711	8.64099	8.60037	8.57001	hsa-miR-138-5p	hsa-miR-495-5p	hsa-miR-373-5p	hsa-miR-500a-3p	hsa-miR-1296-3p
ASCRP005375	0.00240747	2.52138	down	hsa_circRNA_400081	chr4	+	152021740	152022080			GGCTTGACTTTGCGTAAGTAGCTTATTCTTGGTTTGTATTTTCCTT	434.167	375.5	6.77555	8.10976	485	560	429	431	399	301	406	403	394	357	360	333	7.08346	7.7479	6.91087	6.96336	6.57173	5.37595	8.20395	8.35516	8.25009	8.08147	7.93736	7.8305	hsa-miR-140-3p	hsa-miR-338-5p	hsa-miR-127-5p	hsa-miR-421	hsa-miR-300
ASCRP000442	0.00683072	2.83511	down	hsa_circRNA_100052	chr1	+	12032928	12033054	uc001atm.3	PLOD1	TGGATTACGAGGCCCAGTTTGACCTGGCCTTTGTCGTCCGCTACAA	468.167	464.667	7.02321	8.52662	504	357	572	393	543	440	462	295	493	401	684	453	7.20006	5.44657	8.05843	6.67063	7.79684	6.96673	8.51947	7.58432	8.78477	8.36577	9.28838	8.617	hsa-miR-659-3p	hsa-miR-194-3p	hsa-miR-767-3p	hsa-miR-345-5p	hsa-miR-644a
ASCRP000519	0.000891728	2.06695	down	hsa_circRNA_100129	chr1	-	31413997	31414970	uc001bsf.1	PUM1	AATTTGCAAGGTATTTGCCTTATCCACACATCCTTATGGCTGCCGA	444	351	6.89795	7.94545	442	439	416	503	364	500	318	324	345	360	401	358	6.69984	6.88822	6.77751	7.47403	6.16404	7.38405	7.50679	7.82043	7.92925	8.10612	8.28154	8.02859	hsa-miR-486-5p	hsa-miR-650	hsa-miR-335-3p	hsa-miR-300	hsa-miR-381-3p
ASCRP002243	1.1426e-06	2.11408	down	hsa_circRNA_101901	chr16	+	88008653	88052273	uc002fkp.3	BANP	GGCATCCGGTGTGACCAAAAGCCAGCCCCACTGTGAGTTGAACTCT	678.333	697	8.28245	9.36248	646	720	646	694	719	645	723	658	677	709	766	649	7.91562	8.39428	8.44034	8.34021	8.54512	8.05911	9.39267	9.32183	9.31014	9.42373	9.46913	9.25738	hsa-miR-323a-5p	hsa-miR-141-5p	hsa-miR-432-3p	hsa-miR-219a-5p	hsa-miR-874-3p
ASCRP002017	0.000193493	2.07168	down	hsa_circRNA_101670	chr16	-	359972	364683	uc002cgp.2	AXIN1	AGGTCAATGGGCGGGTGCCCCTACCTCACATTCCCGTATGGATCCT	1577.17	2103.67	10.0698	11.1206	1509	1112	1412	1788	1853	1789	1725	1564	2219	2362	2576	2176	10.0857	9.51561	9.95813	10.4088	10.2072	10.2436	10.759	10.6711	11.2237	11.3461	11.4579	11.2661	hsa-miR-762	hsa-miR-632	hsa-miR-612	hsa-miR-127-3p	hsa-miR-484
ASCRP002758	0.0206957	2.06803	down	hsa_circRNA_102439	chr19	-	10286215	10288043	uc002mng.3	DNMT1	CAAAGACCAGCTGAACCTTCACCTAGCCCCAGGATTACAAGGAAAA	1668.5	2801	10.223	11.2713	1703	1500	1780	1726	1711	1591	2169	1900	1861	1622	1750	7504	10.3436	10.1428	10.414	10.3527	10.0702	10.0149	11.1042	10.9492	10.9526	10.694	10.7995	13.1283	hsa-miR-876-3p	hsa-miR-450b-5p	hsa-miR-1468-5p	hsa-miR-1468-3p	hsa-miR-627-3p
ASCRP002662	1.32558e-05	2.10341	down	hsa_circRNA_102343	chr18	+	29691716	29704808	uc002kxg.3	RNF138	CAGATAGTTCCTGTGTTTCTGTAGAAAATGTTTCCTGACTGCAATG	591.333	564.333	7.93232	9.00505	600	540	602	588	647	571	498	567	548	559	619	595	7.71709	7.63903	8.23899	7.91338	8.33613	7.7493	8.69769	9.04143	8.99682	9.0204	9.13901	9.13496	hsa-miR-670-3p	hsa-miR-19a-5p	hsa-miR-640	hsa-miR-1301-3p	hsa-miR-19b-1-5p
ASCRP005221	4.83838e-05	2.63653	down	hsa_circRNA_104974	chrX	-	2326785	2343345	uc004cqf.4	DHRSX	TAAAAGAAGAAACCTTGAACGACAAAGTTTTCCCCCCACGACCTGA	1274	2066.83	9.66535	11.064	1232	1095	1476	1156	1588	1097	2093	1362	2375	1669	2971	1931	9.63277	9.4775	10.047	9.51971	9.9287	9.38649	11.0286	10.4839	11.3363	10.7411	11.7029	11.0912	hsa-miR-215-3p	hsa-miR-192-3p	hsa-miR-34c-3p	hsa-miR-20b-3p	hsa-miR-19b-1-5p
ASCRP003032	0.000556935	2.09082	down	hsa_circRNA_102720	chr2	-	55214626	55214834	uc002ryc.3	RTN4	AGGCCACCCATTCAGTTGTTGACCTCCTGTACTGGAGAGACATTAA	586.333	532.333	7.81875	8.88283	773	567	575	562	452	589	606	627	543	512	502	404	8.35204	7.77943	8.07614	7.79684	7.07546	7.83262	9.07246	9.23691	8.97882	8.86224	8.8013	8.34521	hsa-miR-645	hsa-miR-155-5p	hsa-miR-214-3p	hsa-miR-320a	hsa-miR-320b
ASCRP001892	0.00121286	3.35223	down	hsa_circRNA_101541	chr15	-	60653139	60674640	uc010uhd.2	ANXA2	AGCTAAAAGCTTCCATGAAGCACTCTACACCCCCAAGTGCATATGG	1189	2065.67	9.31051	11.0556	1023	682	1604	769	1968	1088	2378	1220	2583	1724	2660	1829	9.11004	8.26307	10.1905	8.59074	10.3436	9.36513	11.3079	10.2991	11.469	10.7936	11.5075	10.9566	hsa-miR-182-5p	hsa-miR-9-5p	hsa-miR-33b-5p	hsa-miR-324-5p	hsa-miR-330-3p
ASCRP002102	0.0385485	2.55147	down	hsa_circRNA_101756	chr16	+	22236974	22237296	uc002dkh.3	EEF2K	CCACTTCAAGGACCTTCGCCTCTGCATTTGTCCAGTAACTCTGGCT	1077.17	2425.83	9.32448	10.6758	1303	862	1140	1087	1081	990	1168	1105	1142	1010	1119	9011	9.76113	8.77135	9.53406	9.38712	9.3176	9.17565	10.2171	10.183	10.1767	9.97064	10.0843	13.4231	hsa-miR-670-3p	hsa-miR-361-5p	hsa-miR-193b-3p	hsa-miR-153-5p	hsa-miR-486-3p
ASCRP001542	7.65315e-05	2.07181	down	hsa_circRNA_101179	chr12	+	121004627	121009094	uc001tyq.4	RNF10	CTTTGCCCAGACCCAGAAGTCCACATTCCCCTCGAGAATCTACAGC	1627.17	2211.83	10.1491	11.2	1448	1345	1858	1469	2184	1459	2342	1887	2621	1828	2717	1876	9.98803	9.93522	10.4781	10.0717	10.5576	9.86412	11.2819	10.9386	11.4903	10.9208	11.528	11.0405	hsa-miR-765	hsa-miR-422a	hsa-miR-874-5p	hsa-miR-186-3p	hsa-miR-328-3p
ASCRP001227	0.000117325	3.00178	down	hsa_circRNA_100853	chr11	+	66288740	66291353	uc001oii.1	BBS1	GTGACAAGGCCCTGCTCAATGTCATCCACACCCCGATGAGCCTTCC	1549.17	2965.33	10.0206	11.6064	1625	1141	1806	1186	2150	1387	3633	1806	3794	2288	3647	2624	10.2509	9.57727	10.4328	9.57088	10.5197	9.77197	11.9368	10.8543	12.0282	11.2819	11.9824	11.5548	hsa-miR-188-3p	hsa-miR-581	hsa-miR-665	hsa-miR-193a-3p	hsa-miR-889-5p
ASCRP005355	7.5622e-07	2.43732	down	hsa_circRNA_400061	chr20	-	25477659	25477979			TAGAAACCACCTAGAAACTTTCCTGCCACCAATGATTTACACAGTG	674.5	770.333	8.25922	9.54451	625	664	598	760	641	759	690	700	761	803	835	833	7.8305	8.19536	8.21694	8.55985	8.31872	8.43393	9.32596	9.43732	9.52413	9.65478	9.59875	9.72614	hsa-miR-324-5p	hsa-miR-588	hsa-miR-140-5p	hsa-miR-216a-3p	hsa-miR-299-3p
ASCRP002990	8.2629e-06	2.01707	down	hsa_circRNA_102678	chr2	+	36623756	36669878	uc002rpd.3	CRIM1	TTGCTGTACTTTGCCAACAAGATGAGAACTGGACTGATGACCAACT	563	497.167	7.75626	8.76852	686	558	563	567	491	513	497	515	530	503	504	434	8.0681	7.73385	8.00725	7.82362	7.4287	7.47606	8.69101	8.83512	8.91239	8.83196	8.80748	8.53316	hsa-miR-146b-5p	hsa-miR-146a-5p	hsa-miR-383-3p	hsa-miR-17-3p	hsa-miR-329-5p
ASCRP001786	0.0202797	2.34771	down	hsa_circRNA_101427	chr14	-	91947919	91952074	uc001xzp.1	SMEK1	CATGTTGCAGGACACTCTGATTGTGTGGTCTGAAGCAGAAAATTAT	917.833	1086.83	8.79672	10.028	488	794	780	1091	852	1502	613	871	985	1208	1346	1498	7.10633	8.59354	8.90501	9.39687	8.87382	9.90476	9.09989	9.81425	9.95643	10.2608	10.381	10.6556	hsa-miR-22-5p	hsa-miR-513a-3p	hsa-miR-590-3p	hsa-miR-627-3p	hsa-miR-208a-5p
ASCRP002964	2.617e-05	7.70146	down	hsa_circRNA_102651	chr2	+	27830711	27830906	uc002rla.3	ZNF512	TGGTACCTGATGATCGAAAGATATCCTTCTTTCCAGAGTCAGGACA	363	486	5.75924	8.70437	335	332	325	386	391	409	417	424	470	569	518	518	4.61817	4.92142	5.20992	6.61161	6.48982	6.70446	8.2699	8.45309	8.69275	9.03811	8.86508	8.90726	hsa-miR-146a-3p	hsa-let-7f-2-3p	hsa-miR-612	hsa-miR-1301-3p	hsa-miR-593-3p
ASCRP002055	0.000103075	2.13439	down	hsa_circRNA_101708	chr16	-	11940357	11941663	uc010buw.2	RSL1D1	GTTCTTGCAGGACCTTGCCTCATAGTATTCGATCAGATTCAGAAGA	408.667	317.333	6.55518	7.649	435	389	418	454	363	393	342	299	339	308	312	304	6.59679	6.07053	6.80465	7.12755	6.15225	6.57929	7.74454	7.6199	7.88543	7.7208	7.40335	7.51995	hsa-miR-33a-3p	hsa-let-7f-2-3p	hsa-miR-219a-1-3p	hsa-miR-25-5p	hsa-miR-203a-3p
ASCRP002928	1.3949e-07	2.01624	down	hsa_circRNA_102615	chr2	+	9490936	9508648	uc002qzh.2	ASAP2	AAACCCAACCCAGGCAGCGACATGCTAACCGGCCTCCTGCAAAGCT	799.167	838.667	8.66989	9.68155	847	779	729	868	768	804	802	741	767	811	1002	909	8.60393	8.55602	8.74104	8.85317	8.67257	8.59261	9.59315	9.54448	9.54448	9.66437	9.90739	9.83546	hsa-miR-543	hsa-miR-195-5p	hsa-miR-501-5p	hsa-miR-598-3p	hsa-miR-412-3p
ASCRP000335	1.254e-08	4.54676	down	hsa_circRNA_001808	chr7	+	70991002	70991109			TATTAGACTTAACTGTTAGAGATTTTTAGTGCCAGCCACCACGCCC	691.5	1403.67	8.31069	10.4955	655	656	639	674	802	723	1410	1114	1397	1460	1467	1574	7.95806	8.16091	8.40194	8.26346	8.7603	8.31948	10.4876	10.1953	10.4925	10.5354	10.5162	10.7461	hsa-miR-33b-5p	hsa-miR-93-3p	hsa-miR-33a-5p
ASCRP003768	0.0103171	2.01775	down	hsa_circRNA_103470	chr3	-	129280642	129280746	uc011blb.1	PLXND1	CCATTACAAGAGTGGTTCGCCTCCAGCACACAGAGCTACATCCTTC	758.833	737.167	8.44336	9.45611	925	970	863	501	774	520	860	696	810	613	795	649	8.81791	9.09396	9.08115	7.45771	8.69275	7.51667	9.7287	9.42966	9.63193	9.1627	9.52625	9.25738	hsa-miR-431-5p	hsa-miR-181a-2-3p	hsa-miR-129-5p	hsa-miR-141-5p	hsa-miR-199b-5p
ASCRP004341	8.93177e-05	2.50008	down	hsa_circRNA_104067	chr6	+	17507399	17514185	uc003ncb.3	CAP2	GAGCAAAACAAATGACGTGGCCGCACTTCTGAAACCCATATCGGAA	426.667	366.5	6.73657	8.05854	517	388	432	427	436	360	425	342	392	335	380	325	7.27339	6.05253	6.94689	6.93416	6.93711	6.27532	8.33203	7.96505	8.2366	7.9295	8.13292	7.75515	hsa-miR-412-3p	hsa-miR-561-3p	hsa-miR-30c-2-3p	hsa-miR-146a-3p	hsa-miR-876-5p
ASCRP001614	1.3058e-05	2.70677	down	hsa_circRNA_101251	chr13	+	40293372	40301685	uc001uxh.2	COG6	CCACAGTGAAGTTGAACTCCCACCACCTGATCTTGGACCAAGTTCT	1894.5	3395.33	10.4115	11.848	1497	1262	1987	1788	2640	2193	3344	3059	3665	3450	3598	3256	10.0692	9.78606	10.6209	10.4088	10.9276	10.6563	11.806	11.5724	11.9865	11.8995	11.9587	11.865	hsa-miR-641	hsa-miR-642a-3p	hsa-miR-595	hsa-miR-218-5p	hsa-miR-150-3p
ASCRP001585	1.8757e-05	7.16728	down	hsa_circRNA_101222	chr13	-	20067587	20077417	uc001umd.3	TPTE2	CGAAAGAAAGTCCACCCACAAATGAATTATCAGGAGTGAACCCAGA	308	315.667	4.75696	7.59839	329	290	315	337	316	261	360	335	336	283	290	290	4.47954	3.48871	4.9721	5.86393	5.4355	4.30199	7.88899	7.9196	7.86598	7.45634	7.09494	7.36448	hsa-miR-10a-3p	hsa-miR-326	hsa-miR-330-5p	hsa-miR-455-5p	hsa-miR-181b-5p
ASCRP004390	0.000604314	2.24288	down	hsa_circRNA_104117	chr6	+	44371545	44376369	uc003oxl.3	CDC5L	ACGAACACCAGCTTCCCAGGACAGAATTCTGCAGACGTCTTGCTGC	456.5	411.333	7.08058	8.24593	449	471	479	463	458	419	512	524	397	374	316	345	6.77476	7.20006	7.37502	7.20006	7.14081	6.79277	8.75836	8.86586	8.27359	8.19577	7.44466	7.93736	hsa-miR-138-5p	hsa-miR-544a	hsa-miR-607	hsa-miR-10b-3p	hsa-miR-328-5p
ASCRP003994	6.0969e-07	2.55092	down	hsa_circRNA_103700	chr4	+	89396991	89400658	uc003hrt.3	HERC5	AAGCTGCACAGGATAACCACCTGCCTCAAAGATAATCTGCTCAAAA	614.167	689.667	7.99452	9.34554	677	562	592	661	514	679	664	608	668	743	693	762	8.03731	7.75682	8.18631	8.21289	7.59618	8.17762	9.26199	9.16773	9.2878	9.50374	9.3033	9.54866	hsa-miR-1264	hsa-miR-30c-2-3p	hsa-miR-30c-1-3p	hsa-miR-363-5p	hsa-miR-513a-3p
ASCRP000063	0.00232101	2.09993	down	hsa_circRNA_000552	chr12	+	105501660	105501770			AGCCCTTGGGGGCTGCGGGTGGACGCTCCTTCGGCCCGCCGCTGTT	1605.5	2196.5	10.0802	11.1506	1890	1058	1286	1665	2003	1731	1787	1425	2425	1860	3343	2339	10.5012	9.34928	9.77314	10.2973	10.3756	10.1847	10.7936	10.5514	11.387	10.9401	11.865	11.3662	hsa-miR-573	hsa-miR-642a-5p	hsa-miR-512-3p	hsa-miR-593-5p	hsa-miR-518e-3p
ASCRP004209	1.26569e-06	2.92761	down	hsa_circRNA_103929	chr5	-	125911111	125929096	uc003ktx.3	ALDH7A1	AGTGTGGCTGTCACAAAGTTATTACGACCTATTGCCCTGCTAACAA	449.167	454.833	7.01616	8.56589	469	480	422	450	486	388	473	546	425	438	439	408	6.95853	7.2613	6.85017	7.09758	7.39481	6.5346	8.5689	8.95698	8.44656	8.55921	8.501	8.36267	hsa-miR-329-5p	hsa-miR-767-3p	hsa-miR-103a-2-5p	hsa-miR-214-5p	hsa-miR-152-3p
ASCRP000946	0.000343367	3.19157	down	hsa_circRNA_100566	chr10	-	22880557	22880710	uc001irl.4	PIP4K2A	ACATCCTGAAGAAATACCACCAGAATTCCCTGACCAGGAGCGCACC	404.333	374.333	6.43282	8.10708	423	335	450	378	413	427	368	384	364	398	359	373	6.41007	4.97974	7.12798	6.51238	6.70618	6.86055	7.9486	8.22981	8.0681	8.33315	7.9295	8.13335	hsa-miR-653-3p	hsa-miR-122-5p	hsa-miR-661	hsa-miR-506-5p	hsa-miR-134-3p
ASCRP000706	0.000100133	12.614	down	hsa_circRNA_100319	chr1	-	145601529	145601852	uc001eog.3	POLR3C	ATTGTCTTCCAATGAGCCCATTCCAGATGATGGGATTTATTGGCAG	469.667	1700.17	6.88829	10.5452	690	585	405	490	317	331	2386	3120	1154	1935	573	1033	8.08125	7.85823	6.64443	7.39195	5.45207	5.90181	11.317	11.6253	10.2096	11.0384	9.01436	10.0668	hsa-miR-573	hsa-miR-520g-5p	hsa-miR-877-5p	hsa-miR-27a-3p	hsa-miR-621
ASCRP001825	0.000360286	3.77385	down	hsa_circRNA_101474	chr15	+	39882005	39882224	uc010bbi.3	THBS1	TTACCACTGCAAAAAGGTGTGCAAGCCCCGTAACCCCTGCACGGAT	704.833	1156.5	8.22754	10.1436	569	503	862	565	1022	708	1155	701	1449	977	1591	1066	7.55266	7.4231	9.07815	7.81671	9.23022	8.26443	10.2042	9.43887	10.5176	9.93092	10.6631	10.1068	hsa-miR-25-3p	hsa-miR-196a-5p	hsa-miR-597-3p	hsa-miR-196b-5p	hsa-miR-892a
ASCRP002170	1.18421e-05	3.12146	down	hsa_circRNA_101826	chr16	+	66971939	66973261	uc002eqq.3	CES2	TAACCTGCCGGCCAGGACTCAGCCAGTCCCATCCGGACCACACACA	428	433.5	6.82066	8.46288	442	418	464	392	488	364	476	369	475	394	501	386	6.69984	6.58306	7.25344	6.66472	7.41079	6.3121	8.58652	8.14167	8.7171	8.31193	8.79806	8.22198	hsa-miR-876-3p	hsa-miR-301a-5p	hsa-miR-218-1-3p	hsa-miR-182-5p	hsa-miR-19b-3p
ASCRP002113	0.000716098	2.63302	down	hsa_circRNA_101767	chr16	+	24043456	24105618	uc002dmd.3	PRKCB	AAGCCAGTGTTGATGGCTGGACCCCCGCAGCAAACACAAGTTTAAG	867.333	1138.5	8.77502	10.1717	533	872	948	970	879	1002	1096	1127	1103	1178	1207	1120	7.36631	8.79968	9.23531	9.10569	8.93012	9.213	10.1238	10.2042	10.1043	10.2157	10.1953	10.187	hsa-miR-181b-5p	hsa-miR-181c-5p	hsa-miR-181d-5p	hsa-miR-181a-5p	hsa-miR-329-5p
ASCRP000639	0.000595076	2.34641	down	hsa_circRNA_100251	chr1	+	64515362	64516388	uc001dbi.4	ROR1	CAGGATACTCATTCTTACCTGACCCTCGATGAACCAATGAATAACA	636	701.167	8.08743	9.31789	675	505	647	617	760	612	683	464	868	673	952	567	8.02928	7.43912	8.44484	8.04142	8.65209	7.91786	9.31467	8.64054	9.7287	9.32596	9.83927	9.05821	hsa-miR-30b-3p	hsa-miR-23a-5p	hsa-miR-143-5p	hsa-miR-106b-3p	hsa-miR-508-5p
ASCRP004094	0.000981025	2.17663	down	hsa_circRNA_103804	chr5	-	16762153	16762746	uc010itx.3	MYO10	TATGCTGGAGAGAAACTTGGCCTCCTAGCCCTTATCAATGAAGAAA	998.167	1214.5	9.09672	10.2188	1105	833	1209	802	1197	843	1397	854	1555	953	1583	945	9.34716	8.69057	9.65813	8.68883	9.46913	8.7265	10.4781	9.77978	10.6121	9.88906	10.6446	9.9092	hsa-miR-135b-5p	hsa-miR-520f-3p	hsa-miR-519e-5p	hsa-miR-135a-5p	hsa-miR-892a
ASCRP001087	6.78626e-05	2.726	down	hsa_circRNA_100713	chr10	+	126631025	126655350	uc010qug.2	ZRANB1	AGCAATATTGCTTACAGAGCTTCCTGCCTGACACAGCTCACTTCAA	429.167	390.667	6.77173	8.21852	428	452	410	484	357	444	365	338	371	367	466	437	6.49116	7.0154	6.69984	7.35056	6.07767	6.99575	7.92703	7.93736	8.10699	8.14868	8.6443	8.54673	hsa-miR-146a-3p	hsa-miR-137	hsa-miR-335-3p	hsa-miR-29a-5p	hsa-miR-9-5p
ASCRP003428	1.1691e-07	2.26418	down	hsa_circRNA_103124	chr21	+	37619814	37620866	uc011aeb.2	DOPEY2	TACTTTAAAACCACCAAACACAACCTCCAAGAGGGAAAACATTTCT	488.333	431.333	7.2877	8.46669	573	494	455	487	453	468	495	423	440	403	412	415	7.57584	7.35717	7.16698	7.37067	7.08523	7.17033	8.68255	8.44553	8.53121	8.37991	8.35919	8.40176	hsa-miR-369-5p	hsa-miR-548a-5p	hsa-miR-188-5p	hsa-miR-501-5p	hsa-miR-650
ASCRP003653	0.00115997	2.441	down	hsa_circRNA_103355	chr3	-	47651555	47680270	uc011bbc.1	SMARCC1	TCATCCACCCCAGCCAGAAGGAGCTGAAGAGGAAAAAATGGAAGCC	427	385.667	6.79655	8.08402	528	457	445	405	375	352	474	470	394	357	306	313	7.34021	7.07591	7.07546	6.77806	6.32565	6.18402	8.57789	8.66503	8.25009	8.08147	7.32079	7.60886	hsa-miR-136-5p	hsa-miR-1468-5p	hsa-miR-335-3p	hsa-miR-138-5p	hsa-miR-103a-2-5p
ASCRP003339	1.04936e-06	4.56548	down	hsa_circRNA_103033	chr20	-	33315062	33324562	uc002xav.3	NCOA6	TCTACTAAAGCCCCGTCGCAGAATTTAGTCTCAAAGGAAACTTCAA	482.167	735.333	7.27192	9.46269	453	473	492	452	581	442	903	785	726	763	663	572	6.81643	7.21349	7.47403	7.11068	8.03204	6.98487	9.83157	9.63851	9.43732	9.5553	9.24099	9.07246	hsa-miR-661	hsa-miR-425-3p	hsa-miR-103a-3p	hsa-miR-107	hsa-miR-370-5p
ASCRP001384	1.00509e-05	2.14863	down	hsa_circRNA_101014	chr12	-	12332743	12340053	uc001rah.4	LRP6	CAAGATTGAGGCAGGCAGTGGTTAAAGGTTCCCTTCCACATCCTTT	758.833	822.667	8.54097	9.64439	817	687	738	750	847	714	795	798	711	884	753	995	8.49668	8.2852	8.78231	8.52959	8.86224	8.28982	9.57522	9.65813	9.39829	9.79272	9.43887	10.0031	hsa-miR-455-3p	hsa-miR-770-5p	hsa-miR-525-5p	hsa-miR-141-5p	hsa-miR-223-3p
ASCRP001608	6.236e-08	3.32799	down	hsa_circRNA_101245	chr13	-	33091993	33101669	uc001uuj.2	N4BP2L2	GGAGACAGAGAATTCTGCTTGGTCAGAATCGTGATGGCATTGTGTT	434	457.167	6.86449	8.59914	471	454	399	444	450	386	473	399	471	481	485	434	6.97105	7.03753	6.55328	7.04756	7.05526	6.52223	8.5689	8.32455	8.69711	8.73696	8.73414	8.53316	hsa-miR-135a-5p	hsa-miR-218-1-3p	hsa-miR-135b-5p	hsa-miR-329-3p	hsa-miR-618
ASCRP004921	6.86814e-06	2.82172	down	hsa_circRNA_104668	chr8	+	102555468	102571040	uc011lhi.1	GRHL2	AGCCACAGAGTAATAAAAGACTAGTGGCCTTAGTGCCCATGCCCAG	387.167	335.667	6.33916	7.83573	454	376	413	361	382	337	365	294	332	328	366	329	6.82917	5.80064	6.73412	6.2846	6.4044	5.982	7.92703	7.57584	7.83262	7.88848	8.00116	7.78925	hsa-miR-653-3p	hsa-miR-600	hsa-miR-383-3p	hsa-miR-155-5p	hsa-miR-504-3p
ASCRP001982	5.35857e-05	2.19743	down	hsa_circRNA_101633	chr15	+	85657103	85664245	uc002blh.3	PDE8A	AAACATGGAGAGGTAATCAATATTATCAATGCTGCCCAGGAAAGTA	436.667	361	6.88005	8.01587	513	495	400	399	440	373	355	344	380	384	368	335	7.24514	7.36594	6.56349	6.7279	6.972	6.40582	7.84182	7.98084	8.15375	8.25325	8.01981	7.84574	hsa-miR-203a-5p	hsa-miR-432-5p	hsa-miR-770-5p	hsa-miR-34c-5p	hsa-miR-616-3p
ASCRP004541	3.01029e-05	2.08018	down	hsa_circRNA_104271	chr6	+	170697374	170704667	uc003qxp.3	FAM120B	AGACCAGGGACCAGCCTGATTACATCAACCCCAGAGCCGTGCAGCT	529.333	459.167	7.56122	8.61793	459	554	518	541	512	592	495	446	478	420	474	442	6.87394	7.7128	7.673	7.68766	7.57836	7.84155	8.68255	8.56033	8.73046	8.47116	8.68518	8.57789	hsa-miR-759	hsa-miR-26b-3p	hsa-miR-548b-3p	hsa-miR-339-5p	hsa-miR-337-5p
ASCRP003057	2.29047e-05	2.48471	down	hsa_circRNA_102745	chr2	+	65228581	65231149	uc010ypz.2	SLC1A4	ATGTAACCCATGAAAAGAAACCTGTTTCCCTCCAATCTTGTGGTTG	14210.2	25451.3	13.567	14.88	10106	11032	15576	13435	17189	17923	30387	30785	21386	28325	16287	25538	13.0751	13.2233	13.6426	13.5641	13.8627	14.0341	15.0454	15.0454	14.7287	15.0454	14.477	14.9382	hsa-miR-558	hsa-miR-26b-3p	hsa-miR-448	hsa-miR-525-5p	hsa-miR-370-5p
ASCRP004680	2.55624e-05	4.27932	down	hsa_circRNA_104424	chr7	+	90585011	90613556	uc003uky.2	CDK14	AATATTTCTGGTCTTGCAAGAGCAAAATCCGTCCCTAGCCACACAT	366.833	364.167	5.93555	8.03293	406	380	315	404	315	381	366	324	361	381	347	406	6.10413	5.87952	4.9721	6.77202	5.41592	6.46961	7.93245	7.82043	8.04848	8.23899	7.8052	8.35204	hsa-miR-516b-5p	hsa-miR-15b-5p	hsa-miR-424-5p	hsa-miR-140-3p	hsa-miR-219a-1-3p
ASCRP003355	1.4563e-06	2.52731	down	hsa_circRNA_103050	chr20	+	35207143	35207369	uc021wcu.1	TGIF2	AACCTGTCAGTGCTGCAAGTTTACCCAAGGTCCAGCCTAGCCCCTA	612.833	702	8.03126	9.36886	598	638	634	641	628	538	717	614	716	686	794	685	7.70764	8.07614	8.38027	8.1389	8.2699	7.6147	9.37721	9.19455	9.40274	9.35938	9.52413	9.35516	hsa-miR-412-3p	hsa-miR-657	hsa-miR-191-3p	hsa-miR-198	hsa-miR-612
ASCRP002974	0.00019713	2.05266	down	hsa_circRNA_102661	chr2	+	32399131	32409407	uc002roe.2	SLC30A6	ATTCATTTGGTCCTGGAAGATACTGCTCTTTGGTGTAATAAACTTG	417.167	326	6.66677	7.70426	447	397	402	395	411	451	335	312	331	350	284	344	6.75431	6.23439	6.58931	6.6952	6.68121	7.0462	7.67741	7.73329	7.8199	8.04507	7.02189	7.92801	hsa-miR-670-3p	hsa-miR-449c-5p	hsa-miR-146b-5p	hsa-miR-409-3p	hsa-miR-505-5p
ASCRP003338	0.0151813	2.4444	down	hsa_circRNA_103032	chr20	+	33065576	33067594	uc002xak.2	ITCH	TTTATTGCCATGATAATGAGCTTCAGTCCCCAAGATCTGCGAAGAC	458	381.333	6.86798	8.15746	398	356	591	452	533	418	400	296	398	382	419	393	5.97438	5.42434	8.17824	7.11068	7.73724	6.78298	8.1565	7.59369	8.27941	8.24475	8.39642	8.27398	hsa-miR-548b-3p	hsa-miR-15b-3p	hsa-miR-598-5p	hsa-miR-205-3p	hsa-miR-186-5p
ASCRP005285	7.2015e-07	3.92299	down	hsa_circRNA_105038	chrX	-	153581139	153581292	uc004fkk.2	FLNA	TCATCAACATCAAGTTTGCCGACCAGCACGTGCCTGGCTATGGTGG	539.833	810.833	7.61911	9.59107	644	575	481	519	510	510	1068	873	930	633	792	569	7.91013	7.81724	7.39123	7.57427	7.56477	7.45703	10.0811	9.81638	9.84653	9.22349	9.51561	9.06328	hsa-miR-134-3p	hsa-miR-149-5p	hsa-miR-504-5p	hsa-miR-339-5p	hsa-miR-329-5p
ASCRP003859	0.000383612	2.85684	down	hsa_circRNA_103561	chr3	+	196612021	196613565	uc003fwz.4	SENP5	TGTCTTTCTGCTGCATCCAGATCTCATTATGCATCAGAAAAATGAA	684.333	911.667	8.26361	9.77803	1042	670	660	627	587	520	1038	1096	882	1050	874	530	9.17835	8.22097	8.50249	8.08701	8.07614	7.51667	10.0375	10.1779	9.76009	10.0508	9.69145	8.95043	hsa-miR-888-3p	hsa-miR-520c-3p	hsa-miR-520b	hsa-miR-373-3p	hsa-miR-372-3p
ASCRP004878	3.24464e-06	3.33572	down	hsa_circRNA_104625	chr8	-	53596108	53599527	uc003xre.4	RB1CC1	GCTTGCATTGTTTTCTGAGTTTAACCAGTAATGCCATTCAGTTGCC	527.167	678.833	7.58703	9.32503	489	504	566	472	623	509	699	726	708	646	665	629	7.11112	7.43009	8.02213	7.26794	8.24416	7.44672	9.34253	9.5115	9.39428	9.25394	9.24486	9.20304	hsa-miR-548a-3p	hsa-miR-106b-3p	hsa-miR-199a-5p	hsa-miR-653-5p	hsa-miR-627-3p
ASCRP002463	6.48404e-05	4.78661	down	hsa_circRNA_102131	chr17	+	53024621	53027487	uc002iud.2	TOM1L1	TCACTACAGAGTTTGCCCAAAGGACCAGCCAAAACCTCACCTCAAG	342.667	332.5	5.53927	7.79827	422	299	332	332	348	323	342	308	321	344	335	345	6.393	3.97885	5.35993	5.78109	5.9493	5.77342	7.74454	7.70303	7.72848	8.00116	7.67506	7.93736	hsa-miR-612	hsa-miR-29b-1-5p	hsa-miR-708-5p	hsa-miR-582-3p	hsa-miR-136-5p
ASCRP004200	0.000843407	2.20616	down	hsa_circRNA_103920	chr5	+	96314841	96322374	uc003kmv.1	LNPEP	TGGAACCCTGATCGGCTTCAGCTCCCCAGGAATATGATTGAAAACA	3562.33	5510.33	11.3907	12.5323	2943	2104	5303	2467	5213	3344	6243	4451	6194	5561	5503	5110	11.1968	10.7353	12.1822	10.9566	11.9315	11.3421	12.6196	12.1563	12.7332	12.597	12.5349	12.5527	hsa-miR-1298-3p	hsa-miR-29b-1-5p	hsa-miR-452-3p	hsa-miR-34c-5p	hsa-miR-9-5p
ASCRP004695	0.000789581	2.38753	down	hsa_circRNA_104439	chr7	-	100410368	100410830	uc003uwm.1	EPHB4	CTTCCTGCGGGTACTAAGGTCTACATCGACCCCTTCACTTATGAAG	851.667	1038.33	8.73574	9.99126	915	626	991	740	1068	770	939	660	1292	945	1375	1019	8.79441	8.03456	9.32343	8.49502	9.30063	8.46641	9.8991	9.33017	10.3972	9.86901	10.4227	10.0294	hsa-miR-433-3p	hsa-miR-193a-5p	hsa-miR-15b-3p	hsa-miR-580-3p	hsa-miR-450b-5p
ASCRP001388	2.6651e-07	2.77159	down	hsa_circRNA_101018	chr12	+	14609494	14610229	uc001rby.4	ATF7IP	GTGAATACAGCATCCACCCAACCCACCAGTATCACCAGGAAAAACT	1385.5	2385.83	9.84867	11.3194	1234	1329	1167	1445	1342	1796	2168	2396	2372	2319	2687	2373	9.64566	9.90331	9.58973	10.0414	9.66103	10.2509	11.0989	11.2661	11.3298	11.3079	11.5163	11.3973	hsa-miR-338-3p	hsa-miR-1271-3p	hsa-miR-489-3p	hsa-miR-582-5p	hsa-miR-508-5p
ASCRP000809	1.0688e-07	4.06116	down	hsa_circRNA_100426	chr1	+	201826223	201840455	uc001gwz.3	IPO9	GCAAAGTCAGATTAAAGTATGGACAGCCAACCCCCAACAATTTGTA	481.167	671.667	7.25937	9.28126	476	446	451	502	538	474	616	556	662	661	810	725	7.01354	6.95272	7.13911	7.46555	7.76292	7.22238	9.10514	8.98998	9.27583	9.30063	9.54745	9.46854	hsa-miR-185-3p	hsa-miR-873-5p	hsa-miR-558	hsa-miR-211-3p	hsa-miR-30b-3p
ASCRP003743	4.73e-09	4.42212	down	hsa_circRNA_103445	chr3	-	120351993	120357428	uc003edv.3	HGD	TGGCACCATGGACCCATCCATTTTCACAGTATTGACTGCTAAGTCT	366.167	383.167	6.03414	8.17888	411	372	369	369	357	319	418	381	382	360	399	359	6.19882	5.72764	6.10063	6.393	6.07767	5.70708	8.27786	8.21289	8.16762	8.10612	8.266	8.04279	hsa-miR-202-5p	hsa-miR-764	hsa-miR-330-3p	hsa-miR-34a-3p	hsa-miR-1468-3p
ASCRP002542	0.00512514	2.06885	down	hsa_circRNA_102214	chr17	-	76823326	76834832	uc002jvz.1	USP36	GCTGTGCCAAGCTCTGACGCCCGCTCTGCGGCTTCGGTGTTTGAAC	829.833	860.167	8.67906	9.72789	1497	744	676	696	700	666	1028	866	882	797	860	728	10.0692	8.46641	8.5608	8.35056	8.49151	8.13591	10.0177	9.80668	9.76009	9.64378	9.65977	9.47936	hsa-miR-92a-1-5p	hsa-miR-185-3p	hsa-miR-612	hsa-miR-608	hsa-miR-370-3p
ASCRP004988	1.76185e-06	27.2371	down	hsa_circRNA_104738	chr9	-	16727794	16738483	uc003zmp.1	BNC2	ACTAACCTCTTATTCAGAATGTCCCAACAGGCACACCTTGGGCCCA	287.333	444.333	3.7661	8.5336	317	329	313	280	253	232	456	458	481	437	428	406	4.06398	4.84007	4.92142	4.12726	2.32193	2.32193	8.49034	8.6225	8.74104	8.55602	8.43965	8.35204	hsa-miR-655-5p	hsa-miR-19b-1-5p	hsa-miR-19b-2-5p	hsa-miR-877-3p	hsa-miR-130b-5p
ASCRP003514	1.30208e-05	2.63342	down	hsa_circRNA_103216	chr22	+	38208893	38209616	uc003atz.3	GCAT	GGAGGCCCAGAGCATCCACAAGAATCTAGAAGCAAAAATAGCCCGC	404.5	357.833	6.56521	7.96214	439	395	423	400	423	347	419	353	371	364	331	309	6.65878	6.19882	6.86158	6.73525	6.80841	6.12839	8.29193	8.0396	8.10699	8.13142	7.63086	7.57206	hsa-miR-214-3p	hsa-miR-619-5p	hsa-miR-761	hsa-miR-877-5p	hsa-miR-138-5p
ASCRP002880	0.000106034	2.34962	down	hsa_circRNA_102567	chr19	+	45766370	45766625	uc002pba.2	MARK4	AACCACCCCAACATCGGTTGCCATCAAGATTATCGACAAAACCCAG	1263.83	1862.83	9.63134	10.8638	1134	1047	1271	1259	1596	1276	2185	2633	1571	1957	1169	1662	9.45609	9.31467	9.73985	9.70613	9.93608	9.63519	11.1213	11.3944	10.6316	11.051	10.1428	10.8415	hsa-miR-433-3p	hsa-miR-365b-5p	hsa-miR-365a-5p	hsa-miR-619-5p	hsa-miR-337-5p
ASCRP002710	0.000456652	2.02256	down	hsa_circRNA_102391	chr18	+	74649111	74659608	uc002lmi.3	ZNF236	AGAAATAGCCTACCAGAACTTAACACTACAAGCGGAAGCCTTCCTT	460	365.833	7.04508	8.06127	544	505	422	442	372	475	406	331	364	332	423	339	7.43114	7.43912	6.85017	7.03707	6.2846	7.2284	8.20395	7.88949	8.0681	7.91363	8.41591	7.87651	hsa-miR-125a-5p	hsa-miR-125b-5p	hsa-miR-497-5p	hsa-miR-611	hsa-miR-532-3p
ASCRP004888	0.00113783	2.34296	down	hsa_circRNA_104635	chr8	+	66582107	66582253	uc003xvm.2	MTFR1	AAGCATGCAATCGTGTGTTTTATGGACCATGTGCTGCTATGTATGC	412.167	332.833	6.55918	7.78751	384	458	379	390	383	479	336	306	340	275	420	320	5.70016	7.09054	6.24869	6.64443	6.41078	7.26051	7.6862	7.68444	7.88949	7.36594	8.40176	7.69725	hsa-miR-26b-5p	hsa-miR-653-5p	hsa-miR-26a-5p	hsa-miR-20a-3p	hsa-miR-520d-3p
ASCRP003257	0.000284052	4.77785	down	hsa_circRNA_102950	chr2	+	236626200	236659132	uc002vvs.3	AGAP1	ATGTGGAGAGGGTCTTCCAGGACGGGAATTGTGGGTAACTTGGCCA	420.833	606.5	6.71232	8.96868	434	507	484	407	362	331	844	874	567	620	406	328	6.57929	7.45017	7.40867	6.79277	6.14122	5.90181	9.67463	9.81905	9.04564	9.18415	8.307	7.78162	hsa-miR-431-3p	hsa-miR-181c-5p	hsa-miR-619-3p	hsa-miR-15a-5p	hsa-miR-668-5p
ASCRP001223	0.00580224	2.11851	down	hsa_circRNA_100849	chr11	+	65061623	65063461	uc001odj.3	POLA2	AGAGCTGAGGTACTTCGTGAAGCTCCGGCTCCCACCTTGTCTTTGT	1175.67	1502.83	9.43296	10.516	1234	848	1303	972	1675	1022	1401	814	2026	1126	2336	1314	9.64566	8.73541	9.80876	9.10906	10.0402	9.25866	10.4824	9.69914	11.055	10.1606	11.2971	10.4018	hsa-miR-197-5p	hsa-miR-637	hsa-miR-30b-5p	hsa-miR-361-3p	hsa-miR-30c-5p
ASCRP003298	0.000366944	2.16421	down	hsa_circRNA_102991	chr20	-	5086833	5090091	uc010gbi.3	TMEM230	TCAGCAAAGGGCTGTGTCAGCGTGTTATGATGCCGTCCCGTACCAA	688.167	728.833	8.2866	9.40045	807	565	678	613	806	660	722	510	707	659	845	930	8.46845	7.7723	8.57096	8.02351	8.76914	8.11525	9.38712	8.81791	9.39169	9.29643	9.62669	9.88283	hsa-miR-493-3p	hsa-miR-216a-3p	hsa-miR-302a-5p	hsa-miR-761	hsa-miR-101-3p
ASCRP004548	3.217e-08	2.91011	down	hsa_circRNA_104283	chr7	+	810107	814799	uc003sjb.2	HEATR2	AGAAACTCATCAGGATTTATCCTGGCCCTGCCCTGGGAGAAGCCCT	2725.67	5732.33	11.0531	12.5942	2267	2494	2847	2712	3023	3011	6086	6265	5059	6691	4532	5761	10.7862	11.0017	11.1514	11.0951	11.1076	11.1768	12.597	12.6633	12.4071	12.8417	12.3069	12.7492	hsa-miR-509-5p	hsa-miR-639	hsa-miR-887-5p	hsa-miR-339-3p	hsa-miR-492
ASCRP001149	5.63644e-05	4.13484	down	hsa_circRNA_100775	chr11	-	30516842	30557722	uc001msq.3	MPPED2	ATACGGTGCACCTTGGGTCGACCCCATCCCATATGACACTCCAAAA	418	473.667	6.57933	8.62716	461	406	335	474	392	440	379	416	435	555	498	559	6.88822	6.39443	5.43966	7.28114	6.50578	6.96673	8.0249	8.41203	8.49951	9.00187	8.78722	9.03743	hsa-miR-574-5p	hsa-miR-452-5p	hsa-miR-145-3p	hsa-miR-29b-1-5p	hsa-miR-553
ASCRP004384	1.0828e-07	2.77512	down	hsa_circRNA_104111	chr6	-	42941740	42942776	uc003otf.3	PEX6	AACTGCCCAGAGGTACTTGGAAGGCTCCATCGCCCCTGAAGACAAA	1090.33	1784.67	9.39583	10.8684	1146	1050	1034	1190	995	1127	1457	1855	1628	1979	1746	2043	9.48457	9.32408	9.37404	9.58465	9.18683	9.42083	10.5482	10.9094	10.7059	11.0732	10.7967	11.1768	hsa-miR-422a	hsa-miR-378a-3p	hsa-miR-516b-3p	hsa-miR-516a-3p	hsa-miR-378d
ASCRP002523	0.00993175	3.02506	down	hsa_circRNA_102195	chr17	+	73808192	73809959	uc002jpm.3	UNK	CCACCCCGAGGTGCCCATTCCTGCACAGAACCACAGGGGACACTGA	692.333	1109.17	8.24168	9.83864	971	709	629	549	816	480	2315	1062	1238	528	1111	401	8.93663	8.35608	8.35956	7.73272	8.79752	7.26755	11.2558	10.1278	10.349	8.91026	10.0682	8.32079	hsa-miR-449c-5p	hsa-miR-328-3p	hsa-miR-193b-3p	hsa-miR-658	hsa-miR-2113
ASCRP000626	6.33293e-05	2.21373	down	hsa_circRNA_100238	chr1	-	54717288	54722859	uc001cxe.3	SSBP3	CGGCCCACAGCCTTTTATGTCACCGCGATACGCAGGCGGCCCCAGG	409	332	6.63071	7.77718	426	452	443	407	363	363	391	321	334	301	341	304	6.46894	7.0154	7.05572	6.79277	6.15225	6.29918	8.10262	7.79711	7.8507	7.65492	7.7378	7.51995	hsa-miR-29b-1-5p	hsa-miR-661	hsa-miR-874-5p	hsa-miR-29b-2-5p	hsa-miR-185-3p
ASCRP000463	1.61088e-05	2.16322	down	hsa_circRNA_100073	chr1	-	19499357	19501527	uc001bbm.1	UBR4	TGCATCGTTCACCAGATGCTGTCCCACACCCCAGATTCTACTGTGT	2120.67	3207.17	10.6417	11.7549	2088	1791	1871	2315	2109	2550	2567	2753	3056	3767	3313	3787	10.6556	10.4456	10.4914	10.8543	10.4853	10.9181	11.4062	11.4408	11.7205	12.018	11.8454	12.0984	hsa-miR-1301-3p	hsa-miR-125a-3p	hsa-miR-509-5p	hsa-miR-148b-3p	hsa-miR-501-5p
ASCRP003593	5.16444e-06	3.89681	down	hsa_circRNA_103295	chr3	+	12861584	12869103	uc003bxj.2	CAND2	CGACATCCGGGTCGGCCACACACCCGGAGCACCGTCATCACAGCGG	367.5	352.167	5.98742	7.94972	401	338	356	360	373	377	349	366	369	335	379	315	6.03063	5.0431	5.84732	6.26285	6.29841	6.44222	7.80035	8.12217	8.09231	7.9295	8.12433	7.62965	hsa-miR-708-5p	hsa-miR-1296-5p	hsa-miR-873-5p	hsa-miR-296-5p	hsa-miR-214-3p
ASCRP002176	0.00314753	2.47375	down	hsa_circRNA_101832	chr16	-	67761229	67771938	uc002eud.3	RANBP10	TGCTGCCCTCAACAGCGCCATTTTAGGTATAGCCTTCACAGACCTC	555.667	571.167	7.67006	8.97676	732	511	601	456	632	402	849	644	537	505	486	406	8.23101	7.47909	8.22981	7.14676	8.28443	6.64923	9.69298	9.2878	8.94946	8.83697	8.74132	8.35204	hsa-miR-26b-3p	hsa-miR-637	hsa-miR-632	hsa-miR-147a	hsa-miR-197-5p
ASCRP002201	0.00324412	8.34981	down	hsa_circRNA_101858	chr16	-	70291935	70293089	uc010vlu.1	AARS	TTCTGTTGAGTTCTGTGGGGGAACCCCCGACGAAGACCCATCATGA	375.333	496.333	5.62243	8.68417	265	322	353	407	504	401	423	387	545	376	683	564	2.32193	4.65204	5.80064	6.79277	7.52518	6.64203	8.32079	8.24812	8.98726	8.20965	9.28337	9.05584	hsa-miR-212-5p	hsa-miR-214-3p	hsa-miR-505-5p	hsa-miR-421	hsa-miR-647
ASCRP000830	3.58056e-05	2.14886	down	hsa_circRNA_100447	chr1	+	213134507	213147412	uc001hjv.2	VASH2	GAGAGAAGTCCCTTCAATACCCCAGGTCCCAAACTACAGGCTGTCG	861.667	969	8.82198	9.92555	729	849	906	828	897	961	1130	985	1042	896	956	805	8.22097	8.73851	9.15555	8.76321	8.96938	9.08425	10.1813	10.0072	10.0284	9.81905	9.84816	9.66918	hsa-miR-214-5p	hsa-miR-153-5p	hsa-miR-657	hsa-miR-450a-2-3p	hsa-miR-605-3p
ASCRP001025	8.22372e-05	2.84605	down	hsa_circRNA_100651	chr10	+	96267023	96271411	uc001kjr.2	TBC1D12	GCCTGATGTTGGTTATAACTTTATGAAATCTTCCTCTCAAGAGCAA	415.667	379.667	6.64272	8.15168	440	429	446	422	322	435	424	385	382	343	403	341	6.66945	6.74313	7.08346	6.89278	5.54915	6.91835	8.32717	8.23541	8.16762	7.98986	8.29193	7.89809	hsa-miR-641	hsa-miR-190a-5p	hsa-miR-576-3p	hsa-miR-653-3p	hsa-miR-365b-3p
ASCRP003187	0.000245692	2.90022	down	hsa_circRNA_102879	chr2	+	196544755	196583056	uc002utg.4	SLC39A10	CGTCTTCTGTCATGAACTGCCACATGAATTAGGAAAAATAGAAATG	517.333	583.167	7.49002	9.02618	607	534	550	456	568	389	705	705	650	553	440	446	7.75237	7.61255	7.92777	7.14676	7.95637	6.54429	9.35938	9.45378	9.24416	8.99682	8.5063	8.59665	hsa-miR-335-3p	hsa-miR-580-3p	hsa-miR-130b-5p	hsa-miR-302a-3p	hsa-miR-653-3p
ASCRP005318	0.00196252	2.00371	down	hsa_circRNA_400022	chr11	-	93463898	93464258			CACTGTACACTCATCTCTGGAAATGTAAAATTTACTTACCAAGGCT	451.5	354.5	6.95556	7.95824	430	398	458	458	547	418	359	364	330	388	347	339	6.52092	6.25027	7.19351	7.16447	7.82123	6.78298	7.87932	8.10917	7.80681	8.27243	7.8052	7.87651	hsa-miR-582-5p	hsa-miR-574-5p	hsa-miR-618	hsa-miR-224-5p	hsa-miR-340-5p
ASCRP002987	0	44.2546	down	hsa_circRNA_102674	chr2	+	33525517	33525640	uc002rou.3	LTBP1	CAGTGTGAAGATATTGATGAATGTCAGCAAGGGAATCTATGTGTAA	239.833	335.333	2.32193	7.78969	286	270	248	212	219	204	346	334	343	372	319	298	2.32193	2.32193	2.32193	2.32193	2.32193	2.32193	7.77916	7.91063	7.91462	8.18301	7.48615	7.46453	hsa-miR-339-5p	hsa-miR-500a-3p	hsa-miR-503-3p	hsa-miR-491-3p	hsa-miR-764
ASCRP005243	0.0358959	2.36997	down	hsa_circRNA_104996	chrX	+	47705503	47755339	uc010nhy.2	ZNF81	ACATCAGAGCTGTTCAGAGTTCTTGGAGTCTCTGCGGAGTCCCTGG	439	387.333	6.78095	8.02581	499	360	528	364	516	367	350	217	503	399	500	355	7.17033	5.49153	7.75125	6.32565	7.61009	6.33685	7.80761	6.38223	8.82017	8.34669	8.79373	8.00445	hsa-miR-769-3p	hsa-miR-331-3p	hsa-miR-628-5p	hsa-miR-181a-2-3p	hsa-miR-483-3p
ASCRP004739	1.04471e-06	7.16663	down	hsa_circRNA_104485	chr7	+	129756284	129762042	uc003vpk.2	KLHDC10	TGTGATCTACCAGAAGAGAGGCCACAGACCTCCACCAGCACGAAGT	385.333	574.5	6.16501	9.00631	406	364	352	421	331	438	499	467	559	619	641	662	6.10413	5.57334	5.78546	6.88415	5.6932	6.94981	8.70793	8.6512	9.02537	9.17928	9.1857	9.28838	hsa-miR-519d-5p	hsa-miR-875-5p	hsa-miR-515-5p	hsa-miR-519e-5p	hsa-miR-641
ASCRP003551	5.2057e-07	3.40597	down	hsa_circRNA_103253	chr22	+	46096161	46136418	uc003bgn.2	ATXN10	TAAAGATAACCAAGACAAGCTTTTCGCTGTGGCCTGCAGTTTTTAG	396.5	399.667	6.49164	8.2597	445	402	403	384	379	366	398	327	496	419	403	355	6.73751	6.32265	6.60854	6.58556	6.36993	6.32565	8.14167	7.85148	8.80076	8.46794	8.29193	8.00445	hsa-miR-204-3p	hsa-miR-130b-5p	hsa-miR-501-3p	hsa-miR-660-5p	hsa-miR-502-3p
ASCRP000514	0.0104552	2.25991	down	hsa_circRNA_100124	chr1	+	29068914	29070498	uc001brc.3	YTHDF2	TGTTAAAAAGAATAATGCATATACTGCCATGTCAGATTCCTACTTA	423.333	341	6.62487	7.80114	549	380	499	372	426	314	439	347	349	313	285	313	7.45737	5.87952	7.51798	6.44222	6.82917	5.62297	8.42573	8.00398	7.95733	7.7734	7.03753	7.60886	hsa-miR-661	hsa-miR-628-5p	hsa-miR-671-5p	hsa-miR-192-5p	hsa-miR-215-5p
ASCRP002486	2.69667e-05	2.79653	down	hsa_circRNA_102154	chr17	+	60598133	60601692	uc002izx.4	TLK2	CCAATCCCTTACCGGGACCACTTAATAGTGAGTCTTCCAACCAGAG	420.333	380.833	6.66885	8.15248	423	387	457	451	430	374	423	335	397	401	354	375	6.41007	6.03247	7.18692	7.10371	6.86983	6.41007	8.32079	7.9196	8.27359	8.36577	7.88772	8.14741	hsa-miR-29b-1-5p	hsa-miR-548a-5p	hsa-miR-548c-5p	hsa-miR-548b-5p	hsa-miR-548d-5p
ASCRP001676	0.00132717	2.32054	down	hsa_circRNA_101317	chr14	-	23375403	23378804	uc001whg.3	RBM23	CACTTGCCACTGGGATGAGCAACAAAGGAAAGAAGTTAAAAAGGAT	422.833	349	6.69887	7.91333	566	445	463	372	343	348	402	359	341	334	336	322	7.53494	6.94591	7.24514	6.44222	5.87952	6.14547	8.172	8.07413	7.89909	7.92208	7.68503	7.72763	hsa-miR-138-5p	hsa-miR-422a	hsa-miR-378a-3p	hsa-miR-378d	hsa-miR-877-3p
ASCRP001272	6.0149e-07	2.67358	down	hsa_circRNA_100899	chr11	-	77632385	77633517	uc001oyt.3	INTS4	TGCCTTGAGGGTGCTTGAAGTTTCTGGGAAGTCGGCATCCAACCCT	420.667	378.667	6.73205	8.15083	422	469	411	402	382	438	404	363	378	355	395	377	6.393	7.17948	6.71021	6.75542	6.4044	6.94981	8.19002	8.10043	8.14103	8.06989	8.237	8.16657	hsa-miR-29c-3p	hsa-miR-29b-3p	hsa-miR-550a-5p	hsa-miR-550a-3-5p	hsa-miR-107
ASCRP005191	8.13822e-05	2.73879	down	hsa_circRNA_104944	chr9	+	134072602	134077104	uc004cai.3	NUP214	TAGTCTTTGGCCAGGGGCAACACCCTCCACTAAAGAGTCAAGCCAG	878	1205.33	8.80242	10.256	719	653	966	860	1141	929	1417	1134	1283	1193	1198	1007	8.18631	8.14868	9.27272	8.82641	9.40159	8.97882	10.5012	10.211	10.3917	10.2392	10.1713	10.0213	hsa-miR-320a	hsa-miR-320b	hsa-miR-320c	hsa-miR-766-5p	hsa-miR-608
ASCRP002811	0.00112115	2.25282	down	hsa_circRNA_102494	chr19	-	19407797	19408153	uc010xqr.2	SUGP1	CCTCTGTCAGCTTTCTGTATGAGCCCAATAGCCAAGGGTACAAGTA	766.833	894.5	8.5505	9.72223	907	822	782	667	802	621	1062	1367	662	906	603	767	8.7741	8.66177	8.91101	8.23899	8.7603	7.95685	10.0733	10.4903	9.27583	9.828	9.09825	9.56772	hsa-miR-877-3p	hsa-miR-185-3p	hsa-miR-486-3p	hsa-miR-761	hsa-miR-328-5p
ASCRP002249	4.63853e-05	2.96284	down	hsa_circRNA_101907	chr16	+	89576897	89579445	uc002fni.3	SPG7	GAGGACGAAGAGCTTACAATTGAGACTGCTAACCCCTACCTTTGAA	432.333	414.833	6.78401	8.35099	410	432	421	470	376	485	383	338	412	397	473	486	6.1807	6.78897	6.84076	7.25462	6.34056	7.29843	8.04939	7.93736	8.35883	8.32511	8.67757	8.75766	hsa-miR-188-5p	hsa-miR-524-3p	hsa-miR-525-3p	hsa-miR-22-5p	hsa-miR-142-5p
ASCRP002544	0.0481829	2.02188	down	hsa_circRNA_102216	chr17	+	77073511	77077155	uc002jwu.1	ENGASE	CAACCAGCACAACAGCATCAAAGATGAAGAAGAAGAGACAGTCTTT	633.167	598.667	7.97725	8.99295	748	789	731	581	589	361	850	800	623	542	398	379	8.27941	8.57758	8.74931	7.8867	8.08591	6.2846	9.69805	9.66822	9.17835	8.96974	8.26032	8.18301	hsa-miR-548a-3p	hsa-miR-557	hsa-miR-215-3p	hsa-miR-766-3p	hsa-miR-205-5p
ASCRP001062	3.784e-05	4.08458	down	hsa_circRNA_100688	chr10	+	117221450	117278834	uc001lcg.3	ATRNL1	ACCTTCTTCAGACAGCCTTTTGATTGATTATCAATTTACCTTCAGC	504.167	723.833	7.38973	9.41991	591	448	569	431	589	397	789	786	826	796	643	503	7.67712	6.972	8.03822	6.96336	8.08591	6.60175	9.55642	9.64318	9.65709	9.63783	9.19301	8.83196	hsa-miR-625-3p	hsa-miR-382-5p	hsa-miR-628-5p	hsa-miR-141-5p	hsa-miR-217
ASCRP004885	0.000987749	2.03147	down	hsa_circRNA_104632	chr8	+	62366699	62371101	uc003xuh.3	CLVS1	TGATGAAAAGGACAGCTTTCCTGCCCGCTTTGGAGGAGTCCACTTT	1369.17	1708.33	9.74217	10.7647	1155	972	1770	1147	1667	1504	2086	1741	1546	2026	1270	1581	9.50291	9.10569	10.3917	9.50804	10.0304	9.91426	11.0251	10.8127	10.5981	11.0989	10.2911	10.7623	hsa-miR-574-5p	hsa-miR-520g-3p	hsa-miR-520h	hsa-miR-1468-5p	hsa-miR-506-5p
ASCRP003982	0.000166777	3.28805	down	hsa_circRNA_103688	chr4	+	87685745	87689129	uc003hpy.3	PTPN13	GTCACTGAAGGAATCTTCCTCTTCAGTGAATACATCCAACAAGATG	427.167	410.167	6.62574	8.34298	383	392	434	444	375	535	403	403	406	399	467	383	5.68154	6.13354	6.96721	7.04756	6.32565	7.59897	8.18094	8.35516	8.32192	8.34669	8.6494	8.20375	hsa-miR-101-3p	hsa-miR-561-3p	hsa-miR-488-3p	hsa-miR-409-5p	hsa-miR-575
ASCRP002189	0.00877876	2.12584	down	hsa_circRNA_101846	chr16	+	68893786	68896964	uc002ewh.3	TMCO7	ACCACCCCAGGCTCGGGCTCAAGTTCACTACAGGTCACAAAACATG	1114.83	1514.67	9.39191	10.4799	1305	1231	1361	910	1043	839	2242	2182	1688	1255	914	807	9.76839	9.74132	9.89248	8.97405	9.26473	8.71051	11.1807	11.1602	10.7726	10.3071	9.78224	9.67691	hsa-miR-486-3p	hsa-miR-544a	hsa-miR-92a-1-5p	hsa-miR-10b-3p	hsa-miR-330-3p
ASCRP003256	9.9e-10	4.63932	down	hsa_circRNA_102949	chr2	+	236617822	236659132	uc002vvs.3	AGAP1	TGAATGTGGAGAGGGTCTTCCAGGACGATGCCTTCGTGAACAGCCA	603.833	1168.5	7.98419	10.1981	652	630	585	578	583	595	1330	1234	1223	1024	1287	913	7.94519	8.04416	8.14741	7.86598	8.04575	7.85667	10.4121	10.3105	10.3131	10.0042	10.3071	9.84176	hsa-miR-431-3p	hsa-miR-181c-5p	hsa-miR-619-3p	hsa-miR-15a-5p	hsa-miR-668-5p
ASCRP000942	6.3781e-07	2.03661	down	hsa_circRNA_100562	chr10	-	16794537	16824083	uc001iok.3	RSU1	TTCTGCCCCCAGAACTAGTTACCTTATCCCATATCACACAACTGGT	4423.17	6778.83	11.8264	12.8526	4163	3456	4362	4141	5744	4673	7444	7557	7288	5806	6830	5748	11.7384	11.5321	11.865	11.8012	12.1138	11.9081	12.8493	12.9685	12.9441	12.6711	12.9373	12.7453	hsa-miR-29a-5p	hsa-miR-345-3p	hsa-miR-891a-3p	hsa-miR-767-5p	hsa-miR-147a
ASCRP000833	0.0205203	4.78368	down	hsa_circRNA_100450	chr1	+	213341200	213349835	uc001hkd.3	RPS6KC1	GATTGACAAGGAGAGTCAAGCCCTACCCGTCGAGAAGCTGTGAAGA	420.5	427	6.16956	8.42769	291	391	455	419	583	384	494	448	427	417	430	346	2.32193	6.10762	7.16698	6.86932	8.04575	6.50578	8.67918	8.5689	8.46386	8.45412	8.45583	7.94421	hsa-miR-146a-3p	hsa-miR-26b-3p	hsa-miR-612	hsa-miR-22-5p	hsa-miR-346
ASCRP002266	2.74396e-06	2.29183	down	hsa_circRNA_101924	chr17	-	131558	177370	uc010vpy.2	RPH3AL	TAAGATCTGCAGTGAGCAAAGAGAGATGTGACTCCCCACCCCCAGC	8861.33	14257	12.923	14.1195	7369	8339	9864	8808	9628	9160	14194	12664	16068	14231	14752	13633	12.6633	12.8889	13.0969	12.9938	12.9579	12.9373	13.8627	13.6954	14.388	14.2246	14.3094	14.237	hsa-miR-22-3p	hsa-miR-766-3p	hsa-miR-1301-3p	hsa-miR-589-3p	hsa-miR-671-3p
ASCRP000425	5.73384e-05	2.12215	down	hsa_circRNA_100035	chr1	-	8555122	8674745	uc001ape.3	RERE	CTCTGAATGCACTGAACACAGTCCACAACTCCCAGGCCTGTTGCAG	751.833	805.667	8.52757	9.61309	659	729	717	810	658	938	816	722	920	761	925	690	7.97321	8.41978	8.69406	8.69971	8.36267	9.01599	9.6206	9.50291	9.83394	9.54986	9.79975	9.3715	hsa-miR-105-5p	hsa-miR-16-5p	hsa-miR-424-5p	hsa-miR-15a-5p	hsa-miR-377-3p
ASCRP000945	6.53552e-05	2.88531	down	hsa_circRNA_100565	chr10	+	22019828	22024164	uc001iqv.3	MLLT10	GCTCACACCAATCCCCTGTAAGCAGCTTACAGATTCGCTATGATCA	1191	2158.33	9.5463	11.075	1107	1198	1240	1076	1159	1366	3147	2422	2346	1529	2345	1161	9.35544	9.68189	9.70426	9.3613	9.42215	9.75273	11.7059	11.2749	11.3195	10.604	11.3039	10.2419	hsa-miR-320b	hsa-miR-320a	hsa-miR-26b-3p	hsa-miR-320c	hsa-miR-337-3p
ASCRP004411	8.3941e-07	3.78417	down	hsa_circRNA_104138	chr6	+	76357446	76380436	uc003pic.2	SENP6	GCCTGTAATTGAAAGAATACCCACCTCATGTCCAAAAAGTTGAAAT	444.333	534.333	6.97032	8.89029	478	439	446	375	519	409	605	467	619	495	541	479	7.03707	6.88822	7.08346	6.48177	7.62691	6.70446	9.06922	8.6512	9.1627	8.80076	8.9274	8.73046	hsa-miR-335-3p	hsa-miR-627-3p	hsa-miR-450b-5p	hsa-miR-526b-5p	hsa-miR-153-5p
ASCRP004145	0.000137013	2.42161	down	hsa_circRNA_103856	chr5	-	64587155	64769779	uc003jtr.1	ADAMTS6	CCGCCAATGTAAATATGGGGTTAAAAAATGGCCATACTTTAGTAAC	387.833	313.167	6.32507	7.60103	492	383	386	374	369	323	358	305	322	275	334	285	7.13398	5.95319	6.36993	6.46961	6.25027	5.77342	7.8701	7.67094	7.7347	7.36594	7.66266	7.30186	hsa-miR-320a	hsa-miR-320b	hsa-miR-320c	hsa-miR-373-3p	hsa-miR-30b-3p
ASCRP005096	0.00176912	2.39966	down	hsa_circRNA_104849	chr9	+	109734285	109746690	uc004bcz.3	ZNF462	TGAGCATAAGACTCATCATATTCAGAGCCCCCAGATGTTCAGCAGC	557.667	562.333	7.69518	8.95801	604	462	654	480	696	450	618	402	643	533	665	513	7.73554	7.12453	8.47184	7.32379	8.48196	7.0334	9.11037	8.34558	9.22972	8.92814	9.24486	8.88937	hsa-miR-218-5p	hsa-miR-497-5p	hsa-miR-29b-2-5p	hsa-miR-564	hsa-miR-486-3p
ASCRP000352	5.32836e-05	3.13149	down	hsa_circRNA_001937	chr16	+	53155459	53155541			TGAACATATCCCTTGGATACTCTAAGACCTGACCCTGATTAAGTGG	428.833	412.833	6.71665	8.3635	405	429	434	436	353	516	388	387	439	412	406	445	6.08211	6.74313	6.96721	6.99575	6.01955	7.49217	8.08125	8.24812	8.52176	8.43027	8.307	8.59261	hsa-miR-22-5p	hsa-miR-26b-3p	hsa-miR-10b-3p	hsa-miR-376a-5p	hsa-miR-597-3p
ASCRP001483	0.000552889	7.52456	down	hsa_circRNA_101116	chr12	-	95914772	95918564	uc001teg.3	USP44	TTCTGAAGGAGCAAAGCGTAGAAGGTTTTCCTCCAAACCAGTTGTA	351	391.667	5.30912	8.22073	326	364	299	394	262	461	361	368	346	443	408	424	4.40205	5.57334	4.59348	6.68473	3.48871	7.11242	7.89481	8.1342	7.93736	8.58057	8.32023	8.4572	hsa-miR-449c-5p	hsa-miR-34c-5p	hsa-miR-637	hsa-let-7e-5p	hsa-miR-449b-5p
ASCRP000738	5.1643e-07	2.10994	down	hsa_circRNA_100353	chr1	-	155408117	155429689	uc001fkt.3	ASH1L	AGCAAGAGAATAATAAAAGGCTCCCAGCCAACCTCTGATAAACCCT	760.167	804.167	8.5473	9.62451	888	716	720	714	812	711	852	708	805	789	868	803	8.72976	8.37558	8.7075	8.41115	8.78586	8.27398	9.70426	9.46854	9.62593	9.61662	9.67691	9.65478	hsa-miR-627-3p	hsa-miR-329-5p	hsa-miR-25-3p	hsa-miR-378a-3p	hsa-miR-766-5p
ASCRP004743	3.7194e-07	3.52864	down	hsa_circRNA_104489	chr7	-	129825031	129832663	uc003vpn.2	TMEM209	AGCTCTAAACAAGCCGCAGAAGAGTTGGCGAGCTTTAGCCCCTCTC	428.667	463.667	6.79955	8.61867	467	453	375	426	435	416	540	403	472	485	481	401	6.94932	7.02743	6.19718	6.93121	6.93121	6.76097	8.86018	8.35516	8.70101	8.75933	8.71553	8.32079	hsa-let-7i-5p	hsa-miR-222-5p	hsa-miR-769-5p	hsa-miR-675-5p	hsa-miR-552-5p
ASCRP001618	0.00105358	2.13448	down	hsa_circRNA_101255	chr13	+	41720562	41736539	uc001uxv.1	AK056182	CCTACCTCTGGTATCCAATTGCTCCAGCACCAACTGGTGAAAAGAC	666.833	685.167	8.21962	9.3135	784	648	751	572	705	541	820	812	765	646	603	465	8.38783	8.12519	8.82349	7.84313	8.50993	7.62813	9.63026	9.69145	9.53527	9.25394	9.09825	8.67183	hsa-miR-649	hsa-miR-374a-3p	hsa-miR-29b-1-5p	hsa-miR-637	hsa-miR-548b-3p
ASCRP000207	1.37185e-05	2.81427	down	hsa_circRNA_001129	chr2	-	9019778	9020143			GCGCCTAGGGGCCCAGGAAGAGCCCAGAGCTCGACCACGCTTCCTC	410.167	366	6.57458	8.06734	468	380	402	423	430	358	368	328	354	378	409	359	6.95369	5.87952	6.58931	6.90487	6.86983	6.25027	7.9486	7.86185	8.00116	8.22097	8.32867	8.04279	hsa-miR-92b-5p	hsa-miR-184	hsa-miR-423-5p	hsa-miR-29b-3p	hsa-miR-29a-3p
ASCRP004263	9.21513e-05	4.80125	down	hsa_circRNA_103983	chr5	+	149900429	149901329	uc003lsl.3	NDST1	ATCATTGGCTTCTTCAAGCCTTAGCCCCGTGGGCCCCACGGAGTGA	342.333	341.667	5.52721	7.79062	431	310	339	309	326	339	382	338	366	388	300	276	6.5333	4.3381	5.52324	5.13834	5.61441	6.01584	8.04416	7.93736	8.0748	8.27243	7.23879	7.17616	hsa-miR-214-3p	hsa-miR-637	hsa-miR-761	hsa-miR-147b	hsa-miR-596
ASCRP003824	2.23922e-05	2.19774	down	hsa_circRNA_103526	chr3	+	183368083	183369064	uc003flv.3	KLHL24	ACTAGGCCACGCAGCCACATAAAGAAGATCCCTAATAGTCATTTCT	443.667	368.833	6.94667	8.08269	439	417	470	419	494	423	371	386	358	371	381	346	6.65878	6.5692	7.30262	6.86932	7.4536	6.82653	7.96962	8.24098	8.02582	8.1745	8.14103	7.94421	hsa-miR-450a-2-3p	hsa-miR-16-2-3p	hsa-miR-1283	hsa-miR-379-3p	hsa-miR-587
ASCRP005315	4.746e-08	2.455	down	hsa_circRNA_400019	chr11	+	8706439	8707219			TCTCTGTTCTGTAAGTTAATTGGATGTTTTTCTGTACTTCCATACC	2689	4838.83	11.0412	12.3369	2797	2767	2428	2633	2857	2652	4589	5345	5680	4459	5304	3656	11.1213	11.1555	10.9094	11.0426	11.0286	10.9895	12.2399	12.4476	12.5726	12.2399	12.4851	12.0364	hsa-miR-1298-3p	hsa-miR-612	hsa-miR-204-3p	hsa-miR-20b-3p	hsa-miR-135a-3p
ASCRP001730	0.000291977	3.6062	down	hsa_circRNA_101371	chr14	+	67736417	67770316	uc001xjc.3	MPP5	CCAAGGAAACAGTAAATAAGAAAGCCTTGAGTTTTGTGAAAAACCG	359.5	330.333	5.86044	7.71092	471	351	355	364	334	282	432	326	343	299	296	286	6.97105	5.34078	5.82841	6.32565	5.74007	4.9567	8.37503	7.84155	7.91462	7.63631	7.17948	7.31853	hsa-miR-627-3p	hsa-miR-548c-3p	hsa-miR-766-5p	hsa-miR-660-3p	hsa-miR-93-5p
ASCRP004949	5.47576e-06	7.92195	down	hsa_circRNA_104697	chr8	-	141549418	141551457	uc003yvn.3	EIF2C2	GAACGAGCGGGTGGTGGGCAGCATGGACGCCCACCCCAATCGCTAC	373.167	589.5	6.00235	8.9882	373	356	343	411	357	399	395	583	490	859	484	726	5.45892	5.42434	5.61195	6.81856	6.07767	6.62264	8.12303	9.08801	8.773	9.7428	8.72919	9.47319	hsa-miR-1264	hsa-miR-193b-3p	hsa-miR-28-5p	hsa-miR-193a-3p	hsa-miR-150-3p
ASCRP004141	0.000815588	2.57851	down	hsa_circRNA_103852	chr5	-	64483842	64769779	uc003jto.3	ADAMTS6	CTGGTCTGAGGTTAAAAAATGGCCATACTTTAGTAACTAATCAGCC	431.833	385.833	6.78592	8.15246	563	430	491	385	396	326	389	457	419	363	343	344	7.52485	6.75987	7.46453	6.59803	6.54623	5.82205	8.08723	8.61578	8.39927	8.12433	7.76015	7.92801	hsa-miR-766-3p	hsa-miR-136-5p	hsa-miR-373-3p	hsa-miR-302c-3p	hsa-miR-138-5p
ASCRP004536	0.00318234	2.85866	down	hsa_circRNA_104266	chr6	-	169982931	170052104	uc003qwv.2	WDR27	TCAACCCATCAGCGCCCCAGCTGCACGGAACGTCATGAAGGACCAA	572.167	755.667	7.7568	9.27213	622	594	487	638	481	611	634	1304	438	1018	363	777	7.81377	7.90362	7.428	8.13206	7.35019	7.91313	9.15682	10.3972	8.51504	9.9917	7.97129	9.60076	hsa-miR-324-3p	hsa-miR-187-3p	hsa-miR-660-3p	hsa-miR-508-5p	hsa-miR-646
ASCRP002308	0.000391716	2.81083	down	hsa_circRNA_101968	chr17	-	7217398	7217478	uc002gfy.1	NEURL4	AGCATGCAGGTGACCTGACCACCCTAACATCAGCTGCATACCAGCA	491.667	489.833	7.24631	8.73731	421	420	492	459	601	557	504	417	540	438	537	503	6.37718	6.61407	7.47403	7.17532	8.14698	7.69028	8.72862	8.41644	8.96938	8.55921	8.91824	8.83196	hsa-miR-143-3p	hsa-miR-484	hsa-miR-19b-2-5p	hsa-miR-132-3p	hsa-miR-212-3p
ASCRP001372	5.32196e-05	3.20868	down	hsa_circRNA_101001	chr12	-	6458115	6465046	uc001qnv.3	SCNN1A	ACAACAAGAGGAATTACTCTCACTTCCACCACCCGATGTATGGAAA	1075.33	1873	9.24693	10.9289	1092	697	1171	944	1371	1177	1944	1278	2423	1862	2101	1630	9.30596	8.32173	9.59789	9.04882	9.70426	9.50291	10.9208	10.3563	11.3815	10.9452	11.1448	10.8249	hsa-miR-361-3p	hsa-miR-873-5p	hsa-miR-7-5p	hsa-miR-761	hsa-miR-153-5p
ASCRP000479	8.12906e-05	6.05314	down	hsa_circRNA_100089	chr1	-	21553651	21554534	uc001bei.2	ECE1	TTTGATGATCAAGGTGGAGCATGACCCCGCCCATGGTGAACGCCTA	748.5	1857	8.32176	10.9194	449	532	1005	684	960	861	1999	1544	2135	1719	1997	1748	6.77476	7.60176	9.34253	8.29748	9.12982	8.78422	10.9698	10.6512	11.1555	10.7877	11.055	10.8974	hsa-miR-561-3p	hsa-miR-636	hsa-miR-1271-3p	hsa-miR-550a-5p	hsa-miR-550a-3-5p
ASCRP004132	0.000870249	4.24986	down	hsa_circRNA_103842	chr5	+	56542126	56546968	uc021xyv.1	GPBP1	CAGAACACAGAATATCCTCCGAATCCTAAATCTAGAGCTCCAAGGA	384.333	378.667	6.06133	8.14875	317	372	397	387	377	456	434	346	420	328	385	359	4.06398	5.72764	6.532	6.6202	6.3487	7.07546	8.39392	7.99646	8.40425	7.88848	8.16657	8.04279	hsa-miR-890	hsa-miR-526b-5p	hsa-miR-204-3p	hsa-miR-135b-5p	hsa-miR-181b-3p
ASCRP005185	3.452e-08	2.48373	down	hsa_circRNA_104938	chr9	-	132719638	132720832	uc004byx.1	FNBP1	ATGTCACAAAAGCGGATGTTGAAAAGAACTTTCACGATGGCCGTAA	527.167	522.833	7.55666	8.86917	597	564	506	511	483	502	524	565	537	551	497	463	7.70245	7.76597	7.58495	7.51798	7.36667	7.40193	8.79509	9.03124	8.94946	8.98998	8.78422	8.66503	hsa-miR-28-3p	hsa-miR-450b-5p	hsa-miR-339-5p	hsa-miR-376a-5p	hsa-miR-450a-5p
ASCRP002439	5.12648e-05	2.38765	down	hsa_circRNA_102106	chr17	+	45695715	45696530	uc002ilr.4	NPEPPS	ACTAATAAAGCTTCATAAACAAGCAGATATGCAAGAAGAGAAAAAC	416.667	356.667	6.70778	7.96337	487	421	435	407	381	369	442	363	355	324	363	293	7.10021	6.6269	6.98202	6.79277	6.38727	6.35752	8.43965	8.10043	8.01005	7.85616	7.97129	7.40264	hsa-miR-145-5p	hsa-miR-106a-5p	hsa-miR-17-5p	hsa-miR-410-5p	hsa-miR-106b-5p
ASCRP001281	3.12446e-06	2.33762	down	hsa_circRNA_100908	chr11	-	85685750	85687725	uc001pbo.1	PICALM	ATCAGGAGCACAGGCACCCCCTGTAATGGCCTATCCTGCTACTACA	1525.5	2248.67	10.0122	11.2373	1239	1229	1546	1592	1850	1697	2313	2114	2401	2382	2561	1721	9.65895	9.73492	10.1292	10.2082	10.2031	10.1392	11.2501	11.1267	11.3662	11.3572	11.4457	10.878	hsa-miR-193b-5p	hsa-miR-617	hsa-miR-766-5p	hsa-miR-550a-5p	hsa-miR-485-5p
ASCRP002067	6.69392e-06	3.52778	down	hsa_circRNA_101720	chr16	+	16126965	16130460	uc002del.4	ABCC1	AGAAGGAATGCGCCAAGACTAGGAAAATCCCTGCCCAGAGTCCAGC	1695.83	4087.67	10.2328	12.0516	1885	1453	1866	1521	1945	1505	4987	2621	5759	3129	5002	3028	10.4925	10.0682	10.4839	10.1326	10.3009	9.91917	12.3458	11.387	12.597	11.7668	12.4071	11.806	hsa-miR-383-5p	hsa-miR-370-5p	hsa-miR-185-3p	hsa-miR-10a-5p	hsa-miR-145-5p
ASCRP002134	0.00163815	2.1478	down	hsa_circRNA_101788	chr16	+	28898509	28899043	uc002drn.1	ATP2A1	TGCCATCCCCGAAGGCGAGTCTGTATCTGTCATCAAACACACGGAG	417.5	330.833	6.64216	7.74502	402	446	392	354	482	429	423	330	318	273	355	286	6.04345	6.95272	6.46213	6.16152	7.35717	6.87598	8.32079	7.88238	7.70706	7.34428	7.89708	7.31853	hsa-miR-449b-3p	hsa-miR-558	hsa-miR-588	hsa-miR-328-5p	hsa-miR-141-5p
ASCRP003999	0.000178259	2.7339	down	hsa_circRNA_103705	chr4	+	95506715	95506888	uc003htf.3	PDLIM5	ACTGAACATTCCCACCAAGAAAACACATTGTGGAGCGCTATACAGA	377.833	321.833	6.18455	7.63551	470	364	380	359	356	338	375	357	344	278	287	290	6.96528	5.57334	6.26128	6.24869	6.06156	5.99714	7.99599	8.06361	7.92158	7.40264	7.06472	7.36448	hsa-miR-612	hsa-miR-873-3p	hsa-miR-1298-3p	hsa-miR-541-5p	hsa-miR-493-5p
ASCRP005286	8.6e-10	93.7612	down	hsa_circRNA_105039	chrX	-	153583192	153585991	uc004fkk.2	FLNA	CCAAGTGACGGATCCCGAAGGCAAGCCGAAGAAGACACACATCCAA	261.167	740.167	2.92651	9.47743	280	289	235	262	271	230	775	724	773	776	741	652	2.32193	3.43414	2.32193	3.13895	4.02019	2.32193	9.52094	9.50804	9.56025	9.59533	9.41723	9.26278	hsa-miR-128-2-5p	hsa-miR-128-1-5p	hsa-miR-197-3p	hsa-miR-20b-5p	hsa-miR-17-5p
ASCRP001404	1.34282e-05	2.16868	down	hsa_circRNA_101034	chr12	+	28458581	28460682	uc001rio.3	CCDC91	ATACAAAGAACTTCAGTATCTGGAGTCCATCTTTCACCATCTTCTC	489.667	423.5	7.31142	8.42823	521	505	432	513	532	435	440	420	418	380	431	452	7.30262	7.43912	6.94689	7.53332	7.72819	6.91835	8.43027	8.43618	8.39481	8.23081	8.46369	8.61363	hsa-miR-574-5p	hsa-miR-335-3p	hsa-miR-770-5p	hsa-miR-30c-2-3p	hsa-miR-580-5p
ASCRP004332	0.000305602	2.08859	down	hsa_circRNA_104058	chr6	+	10961537	10964076	uc010jow.3	SYCP2L	CAGCCCTCAGACTCAATAAACTAGAGCGCTTTCAAAATTTGGTTCT	689.833	717	8.33208	9.39461	741	690	727	676	652	653	972	863	745	656	509	557	8.25836	8.29251	8.73414	8.27243	8.34558	8.08944	9.94392	9.79975	9.48373	9.27583	8.83512	9.02928	hsa-miR-219a-1-3p	hsa-miR-383-3p	hsa-miR-452-5p	hsa-miR-548b-3p	hsa-miR-512-5p
ASCRP000599	6.91809e-06	2.11883	down	hsa_circRNA_100211	chr1	-	47037734	47037839	uc001cqd.2	MKNK1	CATACCAAAGGTTCCATCTTAGCCCACATCCAGAAGCAAAAGCACT	726.5	759.167	8.4399	9.52317	644	732	634	752	729	868	706	722	769	792	800	766	7.91013	8.43201	8.38027	8.53527	8.57048	8.81124	9.36258	9.50291	9.55275	9.62494	9.53032	9.5655	hsa-miR-373-3p	hsa-miR-520d-3p	hsa-miR-520c-3p	hsa-miR-520a-3p	hsa-miR-302c-3p
ASCRP002614	7.1713e-07	4.22146	down	hsa_circRNA_102295	chr18	+	9204473	9221997	uc002knv.3	ANKRD12	AGTTACACAGATTCAGATCCAGGACATACAAGTGAAAATTGGGGGG	361.167	358.833	5.91172	7.98947	418	393	351	311	334	360	385	364	381	346	333	344	6.32565	6.16068	5.77012	5.19851	5.74007	6.27532	8.0672	8.10917	8.16091	8.01657	7.65492	7.92801	hsa-miR-876-5p	hsa-miR-23a-3p	hsa-miR-511-5p	hsa-miR-23b-3p	hsa-miR-802
ASCRP002844	0.00289906	2.82363	down	hsa_circRNA_102531	chr19	+	34941169	34957919	uc002nvk.3	UBA2	ACCTCCACAGCTTTTTAAAGATGACATCAGGTATCTGTTGACAATG	474.667	494.167	7.14132	8.63887	582	408	536	391	544	387	667	590	544	451	413	300	7.62965	6.42554	7.80573	6.6564	7.80251	6.5281	9.27272	9.11471	8.98275	8.61209	8.36613	7.48481	hsa-miR-215-3p	hsa-miR-92a-1-5p	hsa-miR-432-5p	hsa-miR-144-5p	hsa-miR-658
ASCRP001495	3.65e-09	2.19753	down	hsa_circRNA_101128	chr12	-	109046047	109048186	uc001tnj.3	CORO1C	AGATTGCCAGAAAAATATGCAGGAACCAATTGCTCTTCATGAGATG	635.333	648.667	8.10785	9.24373	688	704	588	626	571	635	652	640	690	651	654	605	8.07413	8.33929	8.16574	8.08236	7.97321	8.01238	9.21805	9.27136	9.3442	9.266	9.21421	9.14858	hsa-let-7c-5p	hsa-let-7b-5p	hsa-let-7a-5p	hsa-let-7f-5p	hsa-miR-502-5p
ASCRP005063	0.000995876	2.7834	down	hsa_circRNA_104814	chr9	+	91041296	91041506	uc010mqj.3	SPIN1	GCTGATGCAGAGTGCTTGTGATTTCACGTATTTTTGCTGAACTCGT	535.667	559.5	7.45353	8.93038	438	541	420	604	468	743	422	507	523	497	670	738	6.64443	7.64595	6.83129	7.98084	7.23879	8.37991	8.31439	8.81097	8.88836	8.80829	9.25738	9.50291	hsa-miR-422a	hsa-miR-378a-3p	hsa-miR-452-3p	hsa-miR-558	hsa-miR-510-3p
ASCRP001913	0.000483238	2.21563	down	hsa_circRNA_101562	chr15	-	66021409	66025156	uc002aph.3	DENND4A	CTATTTCTCAGCATATTTCTCATTTTATGCATAAAGTTCCTTTTCC	489.5	418.333	7.2397	8.38742	484	527	396	441	476	613	408	350	440	390	492	430	7.07546	7.58338	6.52288	7.02835	7.30186	7.92629	8.21289	8.02028	8.53121	8.28385	8.76997	8.5063	hsa-miR-641	hsa-miR-199b-3p	hsa-miR-199a-3p	hsa-miR-653-5p	hsa-miR-376b-3p
ASCRP002279	0.0314548	2.11375	down	hsa_circRNA_101938	chr17	-	1437392	1461853	uc021tnf.1	PITPNA	AGACAGCTGGATGAATCGAGTAATCCTGCCTGTGTCTGTAGATGAG	706.667	699	8.21312	9.29293	470	475	772	625	978	920	599	438	723	672	1022	740	6.96528	7.22439	8.88047	8.0797	9.16396	8.96494	9.05302	8.51717	9.42818	9.32183	9.92981	9.50754	hsa-miR-19b-2-5p	hsa-miR-22-3p	hsa-miR-193b-3p	hsa-miR-193a-3p	hsa-miR-612
ASCRP004039	0.000145384	2.27113	down	hsa_circRNA_103748	chr4	+	148968042	148968202	uc003ili.3	ARHGAP10	GGGCATCCACTATGTGACAATCCTTACCCTTCCAAGGAGGACACCC	853.333	985.667	8.75631	9.93972	823	674	978	699	1077	869	1056	817	1112	974	1035	920	8.51339	8.23899	9.29643	8.36175	9.30938	8.81791	10.0655	9.70872	10.1271	9.92215	9.95752	9.8574	hsa-miR-483-5p	hsa-miR-665	hsa-miR-211-3p	hsa-miR-198	hsa-miR-20b-3p
ASCRP000314	6.03e-09	3.63468	down	hsa_circRNA_001676	chr12	-	80180153	80183460	ENST00000550903	PPP1R12A	AAAGGCCACCCAGCCCTGTAAGACCAGTAATAAATTTCTGTCTACT	1050.5	2149	9.29307	11.1549	1028	1042	1082	1147	894	1110	2056	2284	2294	2165	2282	1813	9.13581	9.29901	9.45026	9.50804	8.96253	9.40274	11.0059	11.2181	11.2783	11.2104	11.2749	10.9417	hsa-miR-15b-3p	hsa-miR-627-3p	hsa-miR-208a-5p	hsa-miR-29b-1-5p	hsa-miR-96-3p
ASCRP000284	6.67314e-05	2.30921	down	hsa_circRNA_001498	chr19	+	19574204	19574328			GGGGGCGGGGAGGGACACCGTAGCATTCCTCACCTCCCCCAGAGAA	3428.83	5881.17	11.4163	12.6237	3306	2583	4270	3316	3752	3346	5595	4154	7857	5100	7129	5452	11.3572	11.0763	11.8279	11.4002	11.4903	11.3461	12.5077	12.0504	13.0751	12.4476	13.0113	12.6503	hsa-miR-767-3p	hsa-let-7b-5p	hsa-let-7c-5p	hsa-miR-324-3p	hsa-miR-18a-3p
ASCRP004147	4.3195e-07	20.6704	down	hsa_circRNA_103859	chr5	-	64747301	64769779	uc003jtr.1	ADAMTS6	CCACCACGATAATGCAGTTCTTATTACTAGGTTAAAAAATGGCCAT	273	317.167	3.27881	7.64831	318	279	273	252	282	234	332	307	341	309	315	299	4.12036	2.71409	3.55158	2.46397	4.50094	2.32193	7.65552	7.69435	7.89909	7.73329	7.43357	7.47403	hsa-miR-373-3p	hsa-miR-302d-3p	hsa-miR-302a-3p	hsa-miR-520d-3p	hsa-miR-520a-3p
ASCRP003560	2.69285e-06	3.9453	down	hsa_circRNA_103262	chr22	+	47287161	47308084	uc003bib.3	TBC1D22A	TCTTCATTTGTGAATACATAGGGTTACCTTCCCGCCAATGTAGACC	588	955.5	7.8767	9.85684	619	487	543	600	672	607	658	766	1040	1095	1053	1121	7.80035	7.30794	7.8683	7.97082	8.41697	7.89582	9.23022	9.59113	10.0229	10.1263	9.97996	10.1905	hsa-miR-384	hsa-miR-518c-5p	hsa-miR-345-3p	hsa-miR-635	hsa-miR-514a-5p
ASCRP000061	0.0128875	2.42533	down	hsa_circRNA_000526	chr10	+	75998951	76002791			CGGAGTGCAGGCTTGGTAGTTCTGAGAATTTTAGATTCAGTTATAA	553.167	504	7.49606	8.77424	378	541	480	596	585	739	472	407	473	562	596	514	5.57712	7.64595	7.38297	7.94909	8.05911	8.36212	8.56128	8.37449	8.70678	9.02928	9.0807	8.89292	hsa-miR-92a-2-5p	hsa-miR-488-5p	hsa-miR-542-3p	hsa-miR-525-5p	hsa-miR-193b-5p
ASCRP003334	0.00158827	2.01208	down	hsa_circRNA_103028	chr20	-	32873245	32881962	uc002xai.3	AHCY	TTCCTGCCCAAGAAGGTGCAGTGGTCCAGCTGCAACATCTTCTCCA	472.333	398.167	7.18104	8.18973	443	435	471	517	485	483	407	426	318	517	331	390	6.71365	6.82706	7.31098	7.56032	7.38693	7.28731	8.20884	8.46471	7.70706	8.87996	7.63086	8.24693	hsa-miR-377-5p	hsa-miR-323a-5p	hsa-miR-767-3p	hsa-miR-520g-3p	hsa-miR-520h
ASCRP002896	0.000574445	2.73802	down	hsa_circRNA_102583	chr19	-	47919908	47920607	uc002pgq.3	MEIS3	GGACAATCTGTATGATGAGCTGCCGCACTACCCAGGCATCGTGGAT	460.667	423.667	6.96704	8.42018	474	462	346	471	444	567	385	415	439	403	481	419	6.99292	7.12453	5.68037	7.26012	7.01074	7.73357	8.0672	8.40761	8.52176	8.37991	8.71553	8.42905	hsa-miR-762	hsa-miR-23b-3p	hsa-miR-765	hsa-miR-675-5p	hsa-miR-423-5p
ASCRP001042	0.000106394	2.49797	down	hsa_circRNA_100668	chr10	-	103552595	103570071	uc001ktv.2	MGEA5	TAAGGATGAGAGCAACTTATGACTCTCATCTCTGCTGCACGAGAAT	468.5	419.667	7.06717	8.38793	524	432	385	472	443	555	392	383	391	430	434	488	7.31966	6.78897	6.34648	7.26794	7.00139	7.67859	8.10873	8.22399	8.22981	8.52176	8.47758	8.76569	hsa-miR-16-1-3p	hsa-miR-374a-3p	hsa-miR-17-5p	hsa-miR-106a-5p	hsa-miR-376c-5p
ASCRP004576	0.0385258	2.28505	down	hsa_circRNA_104313	chr7	+	11101417	11151094	uc011jxj.2	PHF14	TTCTTCATCTTCCAAGAGAACCAGAGGACGAAAACGAAGCTTCGTT	492.667	451.333	7.20118	8.3934	516	581	668	454	423	314	595	609	437	435	351	281	7.26794	7.84103	8.53915	7.12755	6.80841	5.62297	9.03743	9.17096	8.50812	8.54608	7.85148	7.24633	hsa-miR-670-3p	hsa-miR-495-5p	hsa-miR-103a-2-5p	hsa-miR-623	hsa-miR-20a-3p
ASCRP004947	8.4008e-07	2.80134	down	hsa_circRNA_104695	chr8	-	141407718	141415797	uc003yvi.1	TRAPPC9	TTTACATTAACCTTCGACAGGTGCCCTCACCACCAATGGCATCAAC	737.667	997.833	8.47948	9.96559	685	704	634	783	741	879	827	1008	985	1138	957	1072	8.06361	8.33929	8.38027	8.63677	8.60037	8.85655	9.64258	10.0457	9.95643	10.1796	9.85123	10.118	hsa-miR-34b-5p	hsa-miR-20a-3p	hsa-miR-217	hsa-miR-449c-5p	hsa-miR-770-5p
ASCRP001667	0.000922305	2.55882	down	hsa_circRNA_101308	chr13	+	114164552	114193822	uc001vtu.4	TMCO3	GTTTTCTTCGCCTCCATAGGTGTGGAAGATTTCCTTACAAGGGCCG	701.167	876.667	8.32278	9.67826	791	714	712	536	823	631	1200	1050	982	586	934	508	8.40956	8.37268	8.68035	7.66621	8.81471	7.99316	10.2595	10.1068	9.95037	9.07815	9.81311	8.8616	hsa-miR-139-3p	hsa-miR-143-3p	hsa-miR-876-5p	hsa-miR-641	hsa-miR-619-3p
ASCRP002242	3.50682e-06	2.84215	down	hsa_circRNA_101900	chr16	+	88008653	88017865	uc002fkp.3	BANP	ACGTGCAACAAAGTGCGATGGTGACCAAAAGCCAGCCCCACTGTGA	457.5	452.833	7.05562	8.5626	437	538	426	445	473	426	414	488	425	480	450	460	6.62751	7.63086	6.88415	7.05572	7.28114	6.85433	8.25009	8.73259	8.44656	8.73046	8.56621	8.6497	hsa-miR-432-3p	hsa-miR-219a-5p	hsa-miR-138-5p	hsa-miR-619-3p	hsa-miR-657
ASCRP004253	3.79e-09	3.25636	down	hsa_circRNA_103973	chr5	+	139876104	139876863	uc003lfq.2	ANKHD1	CTGATAGCAGGTACATCCAAGCAGAAGTCCAGTTCCCTCCAGGTAG	6981.83	16099.5	12.5721	14.2753	7520	5945	7177	6409	7478	7362	16630	16014	14914	16584	16015	16440	12.7062	12.3848	12.6949	12.4606	12.597	12.5889	14.1384	14.0095	14.2246	14.388	14.4585	14.4329	hsa-miR-9-5p	hsa-miR-378a-3p	hsa-miR-378d	hsa-miR-422a	hsa-miR-511-5p
ASCRP002303	0.000264808	4.42647	down	hsa_circRNA_101963	chr17	-	5307418	5320002	uc010cle.2	NUP88	TCAAACTTCATAGAGAGATTGCTTTGCATAAATCCACCCCTGTTTG	372.167	374.667	5.96043	8.10658	412	315	359	347	474	326	384	304	397	330	461	372	6.21994	4.47954	5.90482	6.0489	7.28731	5.82205	8.05934	7.66177	8.27359	7.90262	8.617	8.12519	hsa-miR-576-5p	hsa-miR-194-5p	hsa-miR-651-3p	hsa-miR-34c-5p	hsa-miR-153-5p
ASCRP005335	3.18836e-06	3.76764	down	hsa_circRNA_400039	chr17	-	79168812	79169612			GGACGGGGGTACGGCGTCCCAAGCCCGGCTCACAGGCCAGGCTCAG	351	317.5	5.73287	7.64653	381	336	377	325	373	314	328	321	310	330	322	294	5.64356	5.00617	6.22155	5.60456	6.29841	5.62297	7.60763	7.79711	7.62722	7.90262	7.52714	7.41749	hsa-miR-185-3p	hsa-miR-324-3p	hsa-miR-361-3p	hsa-miR-637	hsa-miR-612
ASCRP003012	1.039e-08	5.0728	down	hsa_circRNA_102700	chr2	-	40655612	40657444	uc002rrx.3	SLC8A1	ATGAAATTGTTAGGTTGTGACAGTTGGAAGTGTCATGTACAACATG	399.667	510.333	6.47822	8.821	438	405	364	418	402	371	475	539	509	557	474	508	6.64443	6.38151	5.99526	6.86055	6.60607	6.38151	8.58355	8.93491	8.8477	9.01309	8.68518	8.8616	hsa-miR-27b-3p	hsa-miR-27a-3p	hsa-miR-373-5p	hsa-miR-335-3p	hsa-miR-628-5p
ASCRP002556	1.74823e-05	3.96456	down	hsa_circRNA_102228	chr17	-	79571573	79575848	uc002kat.4	NPLOC4	TTTATGAGCCACCTCAGCCATTCGATGAGGACTATCTAAACCATCT	375.167	370.333	6.0723	8.05946	383	358	408	324	413	365	405	428	383	325	365	316	5.68154	5.46183	6.68473	5.57838	6.70618	6.32115	8.19844	8.47657	8.17596	7.86211	7.99505	7.64865	hsa-miR-511-5p	hsa-miR-764	hsa-miR-339-5p	hsa-miR-211-5p	hsa-miR-204-5p
ASCRP000906	1.32435e-05	2.1505	down	hsa_circRNA_100525	chr10	+	1123846	1142186	uc001igg.1	WDR37	TGACACTAGTGATTCTAAACTGCCTTCCTCGGTTCGCAGTACACTT	736.667	800	8.48161	9.58628	723	661	680	775	748	833	646	717	826	964	765	882	8.19946	8.1799	8.57915	8.61209	8.61991	8.69913	9.20079	9.4936	9.65709	9.9092	9.46429	9.79272	hsa-miR-892b	hsa-miR-138-5p	hsa-miR-329-5p	hsa-miR-488-5p	hsa-miR-671-5p
ASCRP000924	6.07297e-05	2.28546	down	hsa_circRNA_100544	chr10	-	7325865	7327916	uc010qay.2	SFMBT2	TACAGAATGGACCCACCTTCAGCAATCAAAGAGAAGTACACAGACT	419	356.333	6.73634	7.92882	431	437	415	395	439	397	428	403	360	326	304	317	6.5333	6.859	6.7654	6.6952	6.96336	6.60175	8.35148	8.35516	8.04005	7.87061	7.29384	7.66177	hsa-miR-582-3p	hsa-miR-188-3p	hsa-miR-539-5p	hsa-miR-623	hsa-miR-659-5p
ASCRP001670	8.99449e-05	2.6019	down	hsa_circRNA_101311	chr13	-	114806475	114839312	uc001vuj.3	RASA3	TGACTCGGAAGTGCAGGTGAAGCCAAAAACCTTCCCTCTTACCCGG	696.5	862.167	8.30797	9.68753	763	597	722	562	795	740	888	587	981	741	1187	789	8.31552	7.91761	8.7161	7.79684	8.73541	8.36631	9.79671	9.10427	9.94489	9.49843	10.1542	9.62669	hsa-miR-1264	hsa-miR-194-3p	hsa-miR-34c-5p	hsa-miR-1296-3p	hsa-miR-885-3p
ASCRP001350	7.3497e-06	3.09322	down	hsa_circRNA_100979	chr11	+	123464789	123465546	uc001pyw.2	GRAMD1B	GGAAACTCTGGTGTTAAGCCCCACCTACAAGCAGAGAAATGAAGAC	481.833	537.833	7.25855	8.88766	472	497	431	445	550	496	669	539	606	413	559	441	6.97964	7.37611	6.93219	7.05572	7.84208	7.36558	9.27757	8.93491	9.1341	8.43653	8.97286	8.57001	hsa-miR-345-3p	hsa-let-7i-5p	hsa-miR-10b-3p	hsa-let-7g-5p	hsa-let-7b-5p
ASCRP001018	4.37801e-05	3.25629	down	hsa_circRNA_100644	chr10	-	92508595	92509351	uc001kgz.3	HTR7	AGTTTGTGCTGTACCTTGGGATCACAAGGCCCCTCACATACCCTGT	413.167	406.333	6.59232	8.29556	440	371	403	387	470	408	402	338	440	371	523	364	6.66945	5.70362	6.60854	6.6202	7.25462	6.69752	8.172	7.93736	8.53121	8.1745	8.87856	8.0797	hsa-miR-1301-3p	hsa-miR-185-5p	hsa-miR-647	hsa-miR-598-5p	hsa-miR-221-5p
ASCRP004130	2.84055e-05	8.58292	down	hsa_circRNA_103840	chr5	-	54737678	54771278	uc003jqa.3	PPAP2A	TGCTGTTTGTGGCACTGGATTGCCTTTTGCAATTCTTACTTCAAGG	320.333	375.333	4.98293	8.0844	334	356	267	316	316	333	362	417	360	434	372	307	4.58849	5.42434	3.16599	5.35554	5.4355	5.92772	7.90061	8.41644	8.04005	8.53996	8.05956	7.54977	hsa-miR-200b-3p	hsa-miR-200c-3p	hsa-miR-639	hsa-miR-301a-3p	hsa-miR-182-5p
ASCRP002624	0.00307425	2.17979	down	hsa_circRNA_102305	chr18	+	12420323	12421628	uc002kra.3	SLMO1	TGGAAAAGAAAATGGAACTTTGTTCTACCAATCCACCCGTGGGACA	473.5	392.833	7.11463	8.23882	428	410	463	434	631	475	429	362	451	355	415	345	6.49116	6.46418	7.24514	6.97869	8.28018	7.2284	8.35828	8.09319	8.60006	8.06989	8.37413	7.93736	hsa-miR-612	hsa-miR-105-3p	hsa-miR-585-5p	hsa-miR-636	hsa-miR-20b-3p
ASCRP000929	1.61241e-05	2.77518	down	hsa_circRNA_100549	chr10	+	12123470	12136270	uc001ild.4	DHTKD1	ATTCTACACCAACCCCATCATGTACAAAATCATCAGTTGATCATGG	999.167	1522.17	9.1218	10.5944	778	987	853	997	1072	1308	1714	1520	1606	1343	1734	1216	8.37503	9.14805	9.05652	9.17096	9.30558	9.67463	10.7489	10.6337	10.6793	10.4158	10.7877	10.3009	hsa-miR-518c-5p	hsa-miR-670-3p	hsa-miR-17-3p	hsa-miR-516b-5p	hsa-miR-509-5p
ASCRP005047	2.02443e-06	2.07916	down	hsa_circRNA_104798	chr9	+	82267507	82268990	uc010mps.3	TLE4	CTCCATCAAGCAACAACTCCAGGCCCAGCATTTATCACATGGACAT	631	618.167	8.10029	9.15629	649	602	617	594	686	638	657	595	674	571	680	532	7.92851	7.93589	8.31079	7.94226	8.45618	8.02813	9.2245	9.13271	9.30444	9.04314	9.27757	8.9554	hsa-miR-185-3p	hsa-miR-762	hsa-miR-9-5p	hsa-miR-345-3p	hsa-miR-103a-2-5p
ASCRP004311	1.5583e-07	2.35422	down	hsa_circRNA_104036	chr5	-	179688683	179707608	uc021yjj.1	MAPK9	TTCAGCTGGTATAATTCATAGAGGATCTGAAACTTGCCCACCCTTC	545.5	536.333	7.6678	8.90305	582	540	492	560	540	559	515	450	571	536	624	522	7.62965	7.63903	7.47403	7.78544	7.77998	7.69869	8.76569	8.5801	9.05302	8.94532	9.15471	8.91948	hsa-miR-433-3p	hsa-miR-642a-3p	hsa-miR-153-5p	hsa-miR-548a-3p	hsa-miR-659-3p
ASCRP003825	0.000232548	2.02376	down	hsa_circRNA_103527	chr3	+	183368083	183390272	uc003flv.3	KLHL24	ATTCAGCCGTCAGCCACATAAAGAAGATCCCTAATAGTCATTTCTC	499.5	415.667	7.36148	8.37852	582	476	456	391	548	544	410	425	446	398	415	400	7.62965	7.2332	7.17699	6.6564	7.82998	7.64264	8.22299	8.4572	8.57664	8.33315	8.37413	8.307	hsa-miR-450a-2-3p	hsa-miR-455-3p	hsa-miR-562	hsa-miR-543	hsa-miR-16-2-3p
ASCRP001031	0.000631733	2.26168	down	hsa_circRNA_100657	chr10	-	99236439	99238146	uc009xvt.3	MMS19	ATCGATTTTACCCCTTGGTACACCTGATACTGTTCTATGAGAACCG	461.667	383.5	6.99897	8.17636	403	450	427	475	443	572	395	356	419	334	423	374	6.06156	6.99292	6.89227	7.28885	7.00139	7.75682	8.12303	8.05685	8.39927	7.92208	8.41591	8.14103	hsa-miR-450b-3p	hsa-miR-619-3p	hsa-miR-486-3p	hsa-miR-769-3p	hsa-miR-619-5p
ASCRP004406	1.07252e-06	2.87152	down	hsa_circRNA_104133	chr6	+	71185112	71212494	uc003pfl.3	FAM135A	TACTTTGAGGGTATGACTTTAGCCTTTCCAGCCTCAGTTCATGATT	447.833	431.667	6.95362	8.47544	462	411	407	467	479	461	434	391	453	435	460	417	6.90034	6.48043	6.67299	7.228	7.32754	7.11242	8.39392	8.27476	8.60994	8.54608	8.61148	8.41644	hsa-miR-138-5p	hsa-miR-153-5p	hsa-miR-573	hsa-miR-562	hsa-miR-148b-5p
ASCRP001106	2.4278e-07	2.49657	down	hsa_circRNA_100732	chr11	-	141452	141576	uc001lnz.2	AL137655	GGGACTACAGAAACAGGACCTTGCCCTGTCACTCAGGATGGAGTTC	936.833	1274.17	9.01937	10.3393	873	902	931	973	1004	938	1504	1269	1349	1120	1321	1082	8.68606	8.89178	9.20528	9.11081	9.2063	9.01599	10.5897	10.3518	10.4366	10.1536	10.3563	10.1479	hsa-miR-1296-5p	hsa-miR-204-3p	hsa-miR-637	hsa-miR-661	hsa-miR-181a-2-3p
ASCRP002783	1.5308e-07	2.15516	down	hsa_circRNA_102466	chr19	+	14705443	14706127	uc002mzh.2	CLEC17A	ATCCCTGGCCGCAAAGGAAACAGAGAAACCCCCACTTCCTTGCAAG	1391.33	1894.67	9.85046	10.9583	1316	1188	1500	1266	1633	1445	1996	1677	2041	1788	2104	1762	9.79671	9.67014	10.0925	9.71689	9.99028	9.83624	10.9642	10.7802	11.0703	10.8698	11.1514	10.9137	hsa-miR-575	hsa-miR-552-3p	hsa-miR-765	hsa-miR-381-5p	hsa-miR-215-3p
ASCRP003026	0.000893693	2.84514	down	hsa_circRNA_102714	chr2	-	47134948	47136316	uc002rvk.3	MCFD2	ATGTCCATAAGGAGATATTGATGACCATGAGATCCCTGCTCAGAAC	414.833	361.333	6.52258	8.03108	412	342	432	382	460	461	351	330	388	332	396	371	6.21994	5.12806	6.94689	6.56539	7.16279	7.11242	7.81697	7.88238	8.20884	7.91363	8.24574	8.11893	hsa-miR-517c-3p	hsa-miR-517a-3p	hsa-miR-517b-3p	hsa-miR-30c-2-3p	hsa-miR-892a
ASCRP000789	1.771e-07	2.33116	down	hsa_circRNA_100405	chr1	+	178252698	178269253	uc009wxb.2	RASAL2	ACTAAACTGGATGTGAAAGGACCACCCACCCACCGTCTGTCTTGTG	2361	3937.83	10.8425	12.0636	2105	2065	2181	2508	2645	2662	3361	3778	3956	4620	3925	3987	10.6673	10.7059	10.759	10.9797	10.9417	11.0017	11.8123	11.8922	12.081	12.3142	12.1138	12.1679	hsa-miR-632	hsa-miR-662	hsa-miR-888-3p	hsa-miR-410-5p	hsa-miR-134-5p
ASCRP001715	1.59968e-06	16.1739	down	hsa_circRNA_101356	chr14	+	55168779	55169298	uc001xbb.3	SAMD4A	ACAAGTACAAGAATCATTAACCAATGGCAACAGGAATCCAAGGATA	280.167	340.5	3.83467	7.85026	344	291	268	228	284	266	371	351	348	325	332	316	4.81893	3.55158	3.23146	2.32193	4.58849	4.49562	7.96962	8.02674	7.94909	7.86211	7.64535	7.64865	hsa-miR-148b-5p	hsa-miR-330-3p	hsa-miR-29b-1-5p	hsa-miR-646	hsa-miR-660-5p
ASCRP000383	3.57399e-05	2.86966	down	hsa_circRNA_002117	chr11	-	66626276	66626387			AGCAGGGTTGGCGGCGATGTCCGAGGGCCCGGGGCGGCCCCCCTCG	2327.17	4826.33	10.7809	12.3018	2668	1783	2770	2041	2492	2209	5897	3243	6329	3635	6177	3677	11.051	10.4366	11.111	10.6243	10.7952	10.6673	12.5648	11.6744	12.7635	11.9824	12.7751	12.0504	hsa-miR-185-3p	hsa-miR-371a-3p
ASCRP001426	0.00247876	2.12919	down	hsa_circRNA_101058	chr12	+	51207792	51208222	uc001rww.4	ATF1	TAATGAAAAACAGTTGCCATTGCCCCAAATGGAGCCTTACAGTTGG	430.5	350.167	6.78971	7.88002	529	467	383	358	472	374	419	399	306	352	340	285	7.34724	7.16698	6.31058	6.23039	7.273	6.41007	8.29193	8.32455	7.58432	8.0555	7.72194	7.30186	hsa-miR-654-3p	hsa-miR-190a-5p	hsa-miR-190b	hsa-miR-513a-5p	hsa-miR-612
ASCRP000768	9.75531e-05	6.03617	down	hsa_circRNA_100383	chr1	-	168073714	168074132	uc001gfc.3	GPR161	ATGCTAACCCTCGGGGTCATTGCCATCGACCGTCGTCCAGCATGCT	370.167	434.5	5.85302	8.44666	326	347	343	370	380	455	377	363	435	445	552	435	4.40205	5.24575	5.61195	6.41148	6.37501	7.07189	8.00491	8.10043	8.49951	8.58761	8.94751	8.53996	hsa-miR-214-3p	hsa-miR-761	hsa-let-7g-5p	hsa-let-7e-5p	hsa-miR-495-5p
ASCRP002746	3.0365e-06	2.39765	down	hsa_circRNA_102427	chr19	+	5071020	5082515	uc002mbq.4	KDM4B	TGACTACGGCAAAGTGGCCACTCAGGTACGCCATCCCACCAGAGCA	544.333	534.167	7.63554	8.89716	573	516	463	532	546	636	489	463	557	555	581	560	7.57584	7.51798	7.24514	7.63812	7.81724	8.01889	8.64174	8.63677	9.0197	9.00187	9.0404	9.04245	hsa-miR-660-3p	hsa-miR-376a-5p	hsa-miR-376a-2-5p	hsa-miR-143-3p	hsa-miR-146b-3p
ASCRP002131	3.92e-08	2.66618	down	hsa_circRNA_101785	chr16	-	28181070	28181230	uc002dpa.1	XPO6	ACAGTGCTTGGGCTACTGACAGTTGATCCAGTCCCCTGTGACAACC	646	787.333	8.16348	9.57825	652	649	601	635	671	668	671	728	793	904	846	782	7.94519	8.13206	8.22981	8.12001	8.41274	8.14103	9.2826	9.51832	9.59875	9.82356	9.6311	9.61517	hsa-miR-106b-3p	hsa-miR-500a-3p	hsa-miR-412-3p	hsa-miR-130b-5p	hsa-miR-646
ASCRP001951	0.00073369	2.06679	down	hsa_circRNA_101602	chr15	-	76566752	76580286	uc002bbt.2	ETFA	AAATAGTAGCACCAAACCTTTTGCCCAGAGTAGCAGCCAAACTTGA	434.167	341.167	6.81954	7.86693	522	398	462	366	478	379	364	336	312	338	341	356	7.30794	6.25027	7.23161	6.34944	7.31928	6.45872	7.92034	7.92752	7.64715	7.95733	7.7378	8.01145	hsa-miR-96-5p	hsa-miR-338-3p	hsa-miR-107	hsa-miR-103a-3p	hsa-miR-1271-5p
ASCRP003916	2.6363e-07	2.70937	down	hsa_circRNA_103621	chr4	+	38091552	38104778	uc010ifd.3	TBC1D1	ATGCGATTCTTATTGACCTTGATTATTCAGAGCTGGGAGAGCTTCC	538.333	585.167	7.63552	9.07348	524	585	549	482	521	569	562	643	623	590	566	527	7.31966	7.85823	7.91761	7.33984	7.63691	7.74089	8.94532	9.28299	9.17835	9.09176	8.998	8.94446	hsa-miR-891a-3p	hsa-miR-204-3p	hsa-miR-582-3p	hsa-miR-328-5p	hsa-miR-603
ASCRP004801	9.8943e-07	2.13259	down	hsa_circRNA_104547	chr7	-	158552176	158557544	uc003woc.1	ESYT2	GAACCTTCCGGGTGTTCTAAGGATACATTTTATTGAAGCTCAGGAT	548.167	499.833	7.68245	8.77505	547	525	533	526	526	632	452	500	534	535	485	493	7.44707	7.57206	7.78544	7.60978	7.68386	7.99646	8.47758	8.77862	8.92913	8.93872	8.73414	8.79211	hsa-miR-623	hsa-miR-597-3p	hsa-miR-525-3p	hsa-miR-524-3p	hsa-miR-511-5p
ASCRP001430	6.6e-10	2.72172	down	hsa_circRNA_101062	chr12	-	51467605	51467865	uc001rxu.2	CSRNP2	AAGAGAAACTCCATGCCAAGAAAATGAAGCCACATCCATCCTGAAG	511.333	534.833	7.46795	8.91246	547	511	466	522	522	500	539	563	509	529	564	505	7.44707	7.47909	7.26716	7.58495	7.64535	7.38405	8.85317	9.02387	8.8477	8.91525	8.98785	8.84692	hsa-miR-612	hsa-miR-212-5p	hsa-miR-764	hsa-let-7f-2-3p	hsa-miR-660-3p
ASCRP005287	6.70984e-05	4.48882	down	hsa_circRNA_105040	chrX	-	153590346	153590516	uc004fkk.2	FLNA	TACACAGTCAAGTACACGCCTGTCCAGCAGGTGTCGAGCTTGGCAA	394.833	440.333	6.33148	8.49782	342	412	414	393	427	381	498	466	429	455	431	363	4.76689	6.49116	6.74985	6.67063	6.84076	6.46961	8.69769	8.64535	8.47065	8.64099	8.46369	8.06855	hsa-miR-146b-5p	hsa-miR-146a-5p	hsa-miR-323a-5p	hsa-miR-324-5p	hsa-miR-106b-3p
ASCRP002068	1.7001e-07	2.49265	down	hsa_circRNA_101721	chr16	+	16126965	16150152	uc002del.4	ABCC1	TTCACCTGGGTCTGCACGCCCTTTCTGAATCCCTGCCCAGAGTCCA	4629	8448.83	11.9069	13.2246	4723	3446	4534	4915	5422	4734	8211	7741	9435	8752	9007	7547	11.9943	11.5163	11.9081	12.081	12.0024	11.9396	13.1153	13.0328	13.4231	13.2367	13.3911	13.1486	hsa-miR-185-3p	hsa-miR-643	hsa-miR-134-3p	hsa-miR-432-5p	hsa-miR-380-5p
ASCRP005308	1.397e-08	2.22622	down	hsa_circRNA_400012	chr1	+	76256442	76256662			AAGTTTTTTGTAGAGAAACCTCCACCTCCCAAGCTCAAGCAATTCT	5377.5	9102.67	12.166	13.3206	4793	5017	5777	5299	5740	5639	9330	8350	9888	9176	9502	8370	12.0107	12.1227	12.3368	12.1563	12.1067	12.2631	13.3214	13.1563	13.4976	13.2686	13.432	13.2479	hsa-let-7e-5p	hsa-let-7c-5p	hsa-let-7d-5p	hsa-let-7b-5p	hsa-let-7f-5p
ASCRP004400	4.30797e-05	2.98812	down	hsa_circRNA_104127	chr6	+	56989531	57006893	uc003pdk.1	ZNF451	CTCACTGCCCATTTCAGGAGAATATTAAACGTAAAGACCATATTGA	788.833	1164.67	8.59773	10.177	1024	802	688	609	928	682	1387	1573	926	1068	953	1081	9.11471	8.61532	8.60809	8.00725	9.05652	8.18445	10.4705	10.6879	9.84176	10.0788	9.84005	10.1428	hsa-miR-644a	hsa-miR-18b-5p	hsa-miR-18a-5p	hsa-miR-361-5p	hsa-miR-146a-3p
ASCRP002862	0.00107141	3.73768	down	hsa_circRNA_102549	chr19	-	40842016	40842314	uc002ong.3	C19orf47	AAGTGGTGCACCGTCAGCCACTTCCGAGTGGATCCAGTTCTTTAAG	397.333	371.5	6.19088	8.09302	344	395	324	388	435	498	389	376	385	322	423	334	4.81893	6.19882	5.19523	6.62751	6.93121	7.37358	8.08723	8.18383	8.19146	7.84155	8.41591	7.83814	hsa-miR-580-3p	hsa-miR-499a-3p	hsa-miR-424-5p	hsa-miR-371a-3p	hsa-miR-766-5p
ASCRP004224	1.75e-09	2.71527	down	hsa_circRNA_103944	chr5	+	134022479	134023989	uc011cxu.2	SEC24A	GATATTGAAGTTACGACCACCTCAGCCTCCAGTGTATCTCTTTGTA	2666.67	5229	11.0189	12.46	2249	2415	2831	2610	2962	2933	5137	5135	5815	5276	5311	4700	10.7659	10.9526	11.1448	11.0216	11.0838	11.1448	12.367	12.367	12.6097	12.5004	12.5004	12.4155	hsa-miR-20a-3p	hsa-miR-514a-5p	hsa-miR-33a-5p	hsa-miR-26a-5p	hsa-miR-495-3p
ASCRP002705	0.00564221	2.08998	down	hsa_circRNA_102386	chr18	-	74090809	74092259	uc002lmd.3	ZNF516	GAGCACAGAGGGGGACAGCCGCGCCGCTGCTGCTTTTCCGAAGAGG	799.167	855.667	8.59377	9.65726	1019	545	890	655	902	784	1097	585	1146	732	935	639	9.09132	7.67094	9.11558	8.19126	8.97668	8.51684	10.1278	9.09396	10.1972	9.4775	9.81638	9.23072	hsa-miR-762	hsa-miR-660-3p	hsa-miR-210-5p	hsa-miR-504-5p	hsa-miR-370-3p
ASCRP002270	0.00730303	2.61348	down	hsa_circRNA_101928	chr17	-	706921	708487	uc002fsa.3	NXN	TTCTGTTCTTCGTAGCCGGGGAGGCATCCCCACGCTCATCATGCTG	577.167	658.667	7.73948	9.12545	786	432	633	437	653	522	845	381	896	483	906	441	8.39142	6.78897	8.3763	7.00561	8.34909	7.52551	9.67779	8.21289	9.78197	8.74581	9.76425	8.57001	hsa-miR-342-5p	hsa-miR-182-5p	hsa-miR-2113	hsa-miR-210-5p	hsa-miR-449a
ASCRP003130	0.012953	2.61434	down	hsa_circRNA_102821	chr2	+	131796425	131799517	uc002tsa.1	ARHGEF4	AGAGGACTGGGAGCTCATCAGCGATGGCAGTGTGGTCTGCGCTGAA	710.333	892	8.23561	9.62206	491	719	495	984	613	960	421	740	769	1199	793	1430	7.12712	8.39016	7.4985	9.12831	8.19064	9.07892	8.30738	9.54101	9.55275	10.249	9.51971	10.5625	hsa-miR-572	hsa-miR-608	hsa-miR-544a	hsa-miR-508-5p	hsa-miR-554
ASCRP002206	2.79771e-06	3.35317	down	hsa_circRNA_101863	chr16	-	70796442	70796928	uc002ezm.3	VAC14	TGAATCGGATGAGCACTGAAAGAGCCCCAGTGACCCTTCACCTCGA	462.333	510.333	7.08269	8.82822	450	451	392	473	531	477	523	459	542	534	483	521	6.79168	7.00514	6.46213	7.27339	7.71709	7.24672	8.79211	8.62707	8.97692	8.93319	8.72465	8.91538	hsa-miR-146a-5p	hsa-miR-485-5p	hsa-miR-146b-5p	hsa-miR-141-5p	hsa-miR-492
ASCRP002161	6.54441e-05	3.265	down	hsa_circRNA_101816	chr16	+	53907697	53922863	uc002ehr.3	FTO	GGAGGGTGTGATGATCTCAATGCCACCCACCAACACTGTGTTTTGG	406.5	385.167	6.47675	8.18383	408	357	441	374	439	420	377	346	419	373	371	425	6.14037	5.44657	7.03753	6.46961	6.96336	6.80303	8.00491	7.99646	8.39927	8.18982	8.0478	8.46471	hsa-miR-1323	hsa-miR-598-3p	hsa-miR-520f-3p	hsa-miR-103a-2-5p	hsa-miR-514a-3p
ASCRP000005	0.000393862	2.69376	down	hsa_circRNA_000041	chr1	+	27747415	27747744			GCAGGTTGAGGATTTTATTTGATCCCTGCTCTAATTTTTAGCTTCA	582.833	666.833	7.80283	9.23245	539	505	531	517	799	606	673	443	836	557	900	592	7.40264	7.43912	7.77285	7.56032	8.75251	7.88949	9.28809	8.54399	9.67603	9.01309	9.74441	9.12906	hsa-miR-372-5p	hsa-miR-345-3p	hsa-miR-491-3p	hsa-miR-204-3p	hsa-miR-558
ASCRP002124	0.00112219	2.22093	down	hsa_circRNA_101778	chr16	+	27445667	27449008	uc002doq.2	IL21R	GCTGAGAGCAGCTGGGGCTGCCCCGACCTCGTCTGCTACACCGATT	1866.5	2910	10.4075	11.5586	1827	1656	1542	1864	2490	1820	2450	1401	4021	3058	3847	2683	10.4573	10.3105	10.1217	10.4853	10.7877	10.2823	11.3363	10.5262	12.0923	11.7205	12.073	11.6034	hsa-miR-608	hsa-miR-516b-5p	hsa-miR-573	hsa-miR-181d-5p	hsa-let-7a-5p
ASCRP002104	2.1638e-05	2.30611	down	hsa_circRNA_101758	chr16	+	22319468	22320831	uc002dkj.1	POLR3E	TACAGGCAAGTACCCTGTGCGTCCAGCCTCGATGACCTACGATGAC	567.333	567	7.79622	9.00168	567	498	554	615	643	527	588	529	651	560	585	489	7.54237	7.38189	7.9447	8.03273	8.32455	7.55105	9.02479	8.88798	9.24881	9.02294	9.05336	8.77217	hsa-miR-204-3p	hsa-miR-766-5p	hsa-miR-493-3p	hsa-miR-323a-5p	hsa-miR-675-5p
ASCRP001861	1.1796e-07	4.46219	down	hsa_circRNA_101510	chr15	-	44859621	44865018	uc001ztx.3	SPG11	TGAAATTGATTGAGTCTCAGCCCTGGGGACATAAGCAGATGTTCAA	411.5	498.333	6.59751	8.75527	421	421	381	369	441	436	539	457	405	518	496	575	6.37718	6.6269	6.27532	6.393	6.98345	6.92924	8.85317	8.61578	8.31495	8.88556	8.78122	9.08092	hsa-miR-141-5p	hsa-miR-708-5p	hsa-miR-30a-3p	hsa-miR-30e-3p	hsa-miR-545-3p
ASCRP001729	0.000183259	2.75299	down	hsa_circRNA_101370	chr14	+	67431907	67525503	uc001xix.3	GPHN	TCATCAATTACCGAGATTCCAGACTCCATCATTTCTCGTGGTGTTC	479.833	472.333	7.19787	8.65887	465	409	484	401	584	536	519	423	424	473	506	489	6.93121	6.44637	7.40867	6.74425	8.05188	7.60485	8.77629	8.44553	8.4334	8.70793	8.81791	8.77217	hsa-miR-196b-3p	hsa-miR-500a-3p	hsa-miR-422a	hsa-miR-619-3p	hsa-miR-134-5p
ASCRP001538	3.98801e-05	2.17054	down	hsa_circRNA_101175	chr12	+	120995084	120995485	uc001tyq.4	RNF10	AATGTAGACCATCCCATTCATCTAGGAGCGCATTTGTAGCCATGAA	567.5	551	7.81003	8.92809	631	585	580	515	553	541	606	613	631	529	532	395	7.85823	7.85823	8.11004	7.54656	7.85901	7.62813	9.07246	9.19075	9.20161	8.91525	8.90325	8.2852	hsa-miR-374a-3p	hsa-miR-124-5p	hsa-miR-181b-5p	hsa-miR-181d-5p	hsa-miR-125b-1-3p
ASCRP004935	4.53636e-05	6.72276	down	hsa_circRNA_104682	chr8	-	125332326	125343033	uc010mdl.3	TMEM65	AACACGTCTTAGTACACATTTGAAAAATTGGAAGCTCCACCACCCA	319.333	316.5	4.8982	7.64725	348	310	297	268	365	328	321	319	301	309	331	318	4.92142	4.3381	4.54795	3.55158	6.1807	5.84941	7.53299	7.77971	7.53364	7.73329	7.63086	7.673	hsa-miR-15b-5p	hsa-miR-424-5p	hsa-miR-15a-5p	hsa-miR-652-5p	hsa-miR-22-3p
ASCRP005293	2.84908e-05	7.57997	down	hsa_circRNA_105049	chrY	+	2821949	2829687	uc010nwd.1	ZFY	ATGATTTCGTGAGCTGTGACTAATGAGAATTAAAGGCCATGGATGA	306.667	315	4.67876	7.60095	328	315	266	321	293	317	324	331	274	336	299	326	4.46872	4.47954	3.0619	5.49686	4.89338	5.67214	7.56541	7.88949	7.22358	7.93834	7.22318	7.76569	hsa-miR-767-5p	hsa-miR-1298-3p	hsa-miR-132-3p	hsa-miR-885-5p	hsa-miR-196a-5p
ASCRP002029	0.000149654	2.52633	down	hsa_circRNA_101682	chr16	+	2106196	2108874	uc002con.3	TSC2	ATCATTTTACCAGGATGATCTGTCTGCTGTGCGTCCGGACCGCGTC	432.667	377.667	6.79188	8.12893	395	443	429	429	424	476	346	329	368	358	473	392	5.91383	6.92529	6.91087	6.94689	6.81643	7.23799	7.77916	7.87369	8.08635	8.09099	8.67757	8.2658	hsa-miR-891a-3p	hsa-miR-769-5p	hsa-miR-26b-3p	hsa-miR-449c-5p	hsa-miR-654-5p
ASCRP002350	0.000468516	2.10452	down	hsa_circRNA_102014	chr17	-	27248705	27254081	uc010wbb.1	PHF12	TCTGCTTCACGTGTAACAGTAACCCTCCACTGAGTGAAGAAATGTT	746	783	8.48626	9.55975	584	713	658	769	783	969	770	749	896	774	865	644	7.64595	8.37014	8.49235	8.59074	8.70836	9.11004	9.50754	9.56025	9.78197	9.58848	9.67323	9.24703	hsa-miR-92a-2-5p	hsa-miR-149-5p	hsa-miR-125b-2-3p	hsa-miR-1468-5p	hsa-miR-143-5p
ASCRP005283	1.9684e-07	6.26522	down	hsa_circRNA_105036	chrX	-	149983334	149984551	uc004fek.3	CD99L2	GGAGGAAGAGAGCCATGGGACCACACCACCACCACCACAACCAATA	360	436	5.8469	8.49427	358	373	346	331	380	372	413	390	478	423	480	432	5.13834	5.74007	5.68037	5.75462	6.37501	6.393	8.24416	8.26931	8.73046	8.48967	8.70908	8.5229	hsa-miR-637	hsa-miR-23b-5p	hsa-miR-330-3p	hsa-miR-194-3p	hsa-miR-203a-5p
ASCRP003795	3.47531e-05	3.62673	down	hsa_circRNA_103497	chr3	-	155547476	155560408	uc003fan.4	SLC33A1	TGCTGTTGAGATTTCCTTTTTTTCTGGGGAACTGTATTTTTAATAA	532.833	738.833	7.54456	9.40323	449	519	473	501	574	681	590	545	744	783	1105	666	6.77476	7.53915	7.32754	7.45771	7.9856	8.18259	9.02594	8.95043	9.47936	9.61056	10.0557	9.29739	hsa-miR-34b-5p	hsa-miR-34c-5p	hsa-miR-518a-5p	hsa-miR-527	hsa-miR-567
ASCRP004182	0.000101919	2.85116	down	hsa_circRNA_103902	chr5	-	78734832	78752841	uc003kfy.3	HOMER1	TTTCACATAGGGAACAACCTATCTTCAGCACTCGAGCTCATGTCTT	386.833	328.833	6.2488	7.76035	393	347	406	374	411	390	318	329	345	321	348	312	5.87748	5.24575	6.66353	6.46961	6.68121	6.5552	7.50679	7.87369	7.92925	7.83367	7.81724	7.60145	hsa-miR-145-3p	hsa-miR-151a-3p	hsa-miR-873-3p	hsa-miR-148b-5p	hsa-miR-103a-2-5p
ASCRP004547	8.588e-08	3.79844	down	hsa_circRNA_104282	chr7	-	716865	751164	uc003siu.2	PRKAR1B	ACCTGGATGACAACGAGAGGAGGAAGGAAGCAGCCACCCTCGCCAT	587	903.333	7.89794	9.82335	709	568	608	497	591	549	945	801	998	894	973	809	8.14359	7.78544	8.26697	7.43461	8.09912	7.6579	9.9062	9.67691	9.97877	9.81531	9.87735	9.68555	hsa-miR-432-5p	hsa-miR-654-5p	hsa-miR-620	hsa-miR-484	hsa-miR-520a-3p
ASCRP002590	0.00934565	4.00982	down	hsa_circRNA_102262	chr17	+	80842020	80869665	uc002kfx.1	TBCD	AGACAAGCAGTGCACTGGTGATTGCTGCGGTGTTTGACCGAGACAT	435.667	461.833	6.42076	8.4243	326	424	334	516	394	620	298	374	367	425	605	702	4.40205	6.66945	5.42294	7.55298	6.52419	7.95297	7.28307	8.17346	8.08103	8.49485	9.10427	9.40912	hsa-miR-1271-3p	hsa-miR-323a-5p	hsa-miR-636	hsa-miR-510-5p	hsa-miR-422a
ASCRP004315	5.86802e-06	2.99207	down	hsa_circRNA_104040	chr6	+	304627	311962	uc003msy.1	DUSP22	CCTATGTTGGAGATCCTGCCCGGCCTGTACATCGGCAACTTCAAAG	842.167	1260.17	8.74018	10.3213	725	766	886	895	1024	757	1452	1334	1358	1130	1193	1094	8.20802	8.52959	9.10972	8.93123	9.23611	8.42643	10.545	10.4366	10.4557	10.1676	10.1625	10.1606	hsa-miR-221-5p	hsa-miR-153-5p	hsa-miR-592	hsa-miR-597-5p	hsa-miR-190b
ASCRP002165	6.1816e-07	2.23141	down	hsa_circRNA_101820	chr16	+	57250018	57255327	uc002eld.3	RSPRY1	CCTCAATCATAAGTTACAGTCCCACCCCACAGTCATGCTTTTTGCA	6641.17	10858.7	12.4888	13.6467	5553	5978	6862	6592	7449	7413	11298	10722	12369	10668	10721	9374	12.1822	12.394	12.6419	12.5004	12.5889	12.6251	13.5641	13.4976	13.9546	13.5739	13.7926	13.4976	hsa-miR-19a-3p	hsa-miR-19b-3p	hsa-miR-301a-3p	hsa-miR-626	hsa-miR-519c-3p
ASCRP000539	0.000432694	2.08468	down	hsa_circRNA_100150	chr1	-	33093108	33100393	uc001bvp.3	ZBTB8OS	TTTCATTGTCCAAGCACCCTCAGATTTGGATCATACAGCAGATGTC	421.667	328.833	6.67996	7.73979	434	383	415	380	457	461	384	351	305	282	329	322	6.57929	5.95319	6.7654	6.53978	7.1297	7.11242	8.05934	8.02674	7.57521	7.44466	7.60516	7.72763	hsa-miR-520c-3p	hsa-miR-373-3p	hsa-miR-520f-3p	hsa-miR-520e	hsa-miR-520d-3p
ASCRP003439	5.35815e-06	2.64274	down	hsa_circRNA_103136	chr21	+	42609439	42629253	uc002yyw.3	BACE2	CCCTGTGCAGGTCTAGCACATACCGCTCCAAGGGCTTTGACGTCAC	407.667	357.333	6.57138	7.97342	462	401	387	360	451	385	394	377	370	336	352	315	6.90034	6.30299	6.38368	6.26285	7.06472	6.5137	8.11655	8.18982	8.09912	7.93834	7.86701	7.62965	hsa-miR-503-5p	hsa-miR-182-5p	hsa-miR-450a-2-3p	hsa-miR-581	hsa-miR-455-3p
ASCRP000879	0.000433214	2.62931	down	hsa_circRNA_100497	chr1	-	236187369	236201553	uc001hxo.3	NID1	CGGGCGAACCTGCTATGTTTTCAGCTATAACACGGATTCCCGCCAG	447.833	408.333	6.92745	8.32213	447	392	435	410	563	440	412	313	444	387	469	425	6.75431	6.13354	6.98202	6.80948	7.9186	6.96673	8.2382	7.73977	8.56478	8.26697	8.65835	8.46471	hsa-miR-765	hsa-miR-892a	hsa-miR-24-3p	hsa-miR-671-5p	hsa-miR-323a-5p
ASCRP001410	1.91427e-06	2.37944	down	hsa_circRNA_101040	chr12	-	31586088	31600703	uc001rkh.1	DENND5B	ACTTGAGGGAGGCTTCCTTTCTGTCTGACCAGCCTGAGCCTTACCT	1063.5	1462.67	9.29478	10.5454	986	1072	798	1094	1156	1275	1273	1441	1593	1534	1654	1281	8.97716	9.39267	8.95043	9.40274	9.41723	9.62844	10.3352	10.5711	10.6654	10.607	10.7181	10.3756	hsa-miR-767-3p	hsa-miR-103a-2-5p	hsa-miR-520e	hsa-miR-526b-3p	hsa-miR-373-3p
ASCRP001418	2.14394e-05	2.55057	down	hsa_circRNA_101050	chr12	-	49333437	49334971	uc001rsr.2	ARF3	TTGTCTTTGCAAACAAACAGGATCAAGTCTTCCATACCAGGGACCA	517.5	528.333	7.51357	8.86439	492	542	473	476	595	527	503	418	532	631	577	509	7.13398	7.65373	7.32754	7.29728	8.11785	7.55105	8.72351	8.42328	8.92394	9.21886	9.02756	8.8692	hsa-miR-329-5p	hsa-miR-338-3p	hsa-miR-646	hsa-miR-34a-5p	hsa-miR-525-5p
ASCRP002160	0.000147826	2.50653	down	hsa_circRNA_101815	chr16	+	53513065	53514681	uc002ehi.4	RBL2	ACAGGCAAATGTCACAAAAGAAGATAAGTCCTTCCAGAACATTATG	407	345.5	6.54683	7.87252	518	408	387	378	420	331	373	299	380	376	349	296	7.28114	6.42554	6.38368	6.51238	6.77641	5.90181	7.9818	7.6199	8.15375	8.20965	7.82813	7.44189	hsa-miR-149-5p	hsa-miR-330-5p	hsa-miR-496	hsa-miR-378d	hsa-miR-378a-3p
ASCRP003488	2.412e-08	2.34276	down	hsa_circRNA_103190	chr22	-	28290542	28310335	uc003adk.3	PITPNB	ATATTGCAGATAGAAGTCAAGTTGAACCAGCACCGTGTGGTTTTGC	436.833	374.333	6.89149	8.1197	452	435	418	430	431	455	358	363	406	354	400	365	6.80948	6.82706	6.80465	6.95272	6.88313	7.07189	7.8701	8.10043	8.32192	8.06586	8.27398	8.08591	hsa-miR-2113	hsa-miR-576-5p	hsa-miR-211-5p	hsa-miR-582-5p	hsa-miR-539-5p
ASCRP004572	1.4719e-05	2.28823	down	hsa_circRNA_104308	chr7	+	6618131	6624891	uc003sqh.3	ZDHHC4	GTCTTTCTTATTCAGGTATTCTGCCTTTGACTGCAACTCTTGTCGT	1429.67	2120	9.89717	11.0914	1512	1464	1336	1087	1670	1509	2166	3076	1835	1810	2070	1763	10.0918	10.0857	9.8574	9.38712	10.0353	9.92561	11.0951	11.5941	10.9245	10.8974	11.1178	10.9195	hsa-miR-29b-2-5p	hsa-miR-1271-3p	hsa-miR-125b-2-3p	hsa-miR-499a-3p	hsa-miR-623
ASCRP003571	5.95826e-05	2.65183	down	hsa_circRNA_103273	chr3	-	4490949	4494733	uc003bps.2	SUMF1	ATATTCAACAGGCAATGGTCCCCATCCCTGCTGGAGTATTTACAAT	1439.67	2378	9.88222	11.2892	1287	1099	1630	1205	1757	1660	2493	1578	3048	2131	3168	1850	9.7428	9.49143	10.2248	9.61056	10.1217	10.1021	11.3572	10.6983	11.7083	11.1912	11.7954	10.9849	hsa-miR-764	hsa-miR-16-1-3p	hsa-miR-575	hsa-miR-372-5p	hsa-miR-532-5p
ASCRP004586	2.86926e-05	2.30544	down	hsa_circRNA_104323	chr7	-	20193815	20201493	uc003sus.4	MACC1	GATGTTGCTGTTGAGGTGGAAAAATGCTAATCACTGAAAGAAAACA	506	474.333	7.42348	8.62852	544	541	472	507	468	504	438	593	405	511	383	516	7.43114	7.64595	7.31966	7.49351	7.23879	7.41185	8.41785	9.12272	8.31495	8.85836	8.15629	8.90099	hsa-miR-141-5p	hsa-miR-221-5p	hsa-miR-153-5p	hsa-miR-599	hsa-miR-136-5p
ASCRP000773	0.000152537	2.38678	down	hsa_circRNA_100388	chr1	+	171537385	171540560	uc010pmi.2	PRRC2C	TACTTTCAGCCTCACCTTCAAGGAGTCTGTAACAGACTATACTACA	698.667	785.167	8.30852	9.56358	569	756	621	630	826	790	922	857	839	663	820	610	7.55266	8.50696	8.33315	8.09693	8.82535	8.53608	9.86901	9.78892	9.68482	9.30596	9.57009	9.1627	hsa-miR-149-3p	hsa-miR-766-5p	hsa-miR-153-5p	hsa-miR-30b-3p	hsa-miR-520g-3p
ASCRP003035	2.11533e-05	2.23621	down	hsa_circRNA_102723	chr2	-	56104880	56105000	uc002rzi.3	EFEMP1	ATACCTGCGTAGACATAGATGAATGTACCATCCCTCCATATTGCCA	599.667	605.333	7.94341	9.10446	551	570	569	551	642	715	551	523	647	596	694	621	7.46861	7.79819	8.03822	7.74117	8.32173	8.29251	8.91239	8.86328	9.23611	9.11731	9.31014	9.18755	hsa-miR-95-5p	hsa-miR-22-3p	hsa-miR-510-3p	hsa-miR-510-5p	hsa-miR-192-3p
ASCRP000334	0.0136042	2.81032	down	hsa_circRNA_001805	chr6	+	157431605	157435966			AGAGTGAGAGATGATGCAACCTACTTCTCTCTAGAGGTAGTCAGAT	484.667	434	6.96389	8.45462	388	354	505	429	690	542	415	345	442	445	540	417	5.77452	5.39035	7.57521	6.94689	8.46369	7.63268	8.25915	7.98986	8.55122	8.58761	8.92345	8.41644	hsa-miR-203a-5p	hsa-miR-619-5p	hsa-miR-504-3p	hsa-miR-597-3p	hsa-miR-134-5p
ASCRP000641	0.000779978	2.74541	down	hsa_circRNA_100253	chr1	+	65139030	65141244	uc010opa.1	CACHD1	TCAACTGTCACCGGAGCCCCTGGTAGCAAATGATATCCTCAACCAC	418.833	366.5	6.59088	8.0479	498	374	419	330	465	427	418	315	383	287	411	385	7.16321	5.7635	6.82069	5.72991	7.2074	6.86055	8.27786	7.75209	8.17596	7.51339	8.35259	8.21552	hsa-miR-502-5p	hsa-miR-138-5p	hsa-miR-214-3p	hsa-miR-450b-3p	hsa-miR-653-3p
ASCRP005126	6.50976e-05	2.46974	down	hsa_circRNA_104879	chr9	-	115024714	115060196	uc004bfv.3	PTBP3	CTGGAAGTTCTTCATCAGCGGGGATCTGATGAGCTTCTTTCTTCTG	452.167	402.167	6.99331	8.29767	417	484	410	423	498	481	384	356	421	379	437	436	6.3121	7.29192	6.69984	6.90487	7.47774	7.27339	8.05934	8.05685	8.41062	8.22399	8.49201	8.54319	hsa-miR-1301-3p	hsa-miR-516a-3p	hsa-miR-516b-3p	hsa-miR-224-3p	hsa-miR-215-3p
ASCRP005019	1.65174e-06	5.46336	down	hsa_circRNA_104769	chr9	-	34011624	34017187	uc003ztr.2	UBAP2	GACACTTCCTAGAGCTCAGCCTGATTTTCTATTTTGTACATACATT	375.667	448	6.08515	8.53494	373	394	332	370	412	373	474	489	486	405	465	369	5.45892	6.1807	5.35993	6.41148	6.69404	6.40582	8.57789	8.73696	8.75933	8.39106	8.63828	8.10612	hsa-miR-144-3p	hsa-miR-339-3p	hsa-miR-181b-3p	hsa-miR-582-5p	hsa-let-7f-2-3p
ASCRP001311	1.35247e-06	2.05473	down	hsa_circRNA_100938	chr11	+	94554695	94564707	uc001pfb.3	AMOTL1	GGGGCATTATGCTTCCCAGACCGCCCATGCCAACTTCCGTTCCCAT	1416.83	1855.5	9.89601	10.935	1272	1301	1379	1538	1632	1379	1603	1870	1960	2211	1862	1627	9.71596	9.8449	9.9092	10.1548	9.98803	9.76321	10.6771	10.9208	11.0171	11.247	10.9293	10.8185	hsa-miR-185-3p	hsa-miR-637	hsa-miR-328-5p	hsa-miR-146a-3p	hsa-miR-576-5p
ASCRP002995	4.407e-08	3.75905	down	hsa_circRNA_102683	chr2	+	36668400	36669878	uc002rpd.3	CRIM1	TGCCAACAAGAAGAGAAGCCAGATTGCTCCAAGGCCCGCTGTGAAG	399.5	415.833	6.47562	8.38598	425	405	413	342	414	398	442	373	432	399	445	404	6.44774	6.38151	6.73412	5.95706	6.72165	6.61161	8.43965	8.16553	8.48599	8.34669	8.53284	8.34521	hsa-miR-146b-5p	hsa-miR-146a-5p	hsa-miR-383-3p	hsa-miR-17-3p	hsa-miR-29b-1-5p
ASCRP004310	8.71935e-05	6.64474	down	hsa_circRNA_104035	chr5	-	179675972	179707608	uc021yjj.1	MAPK9	ATGGGCTACAAAGAGAACGGGATCTGAAACTTGCCCACCCTTCGGG	377.667	540.333	6.08021	8.81242	407	309	395	385	401	369	600	333	738	449	684	438	6.12236	4.30199	6.50578	6.59803	6.59554	6.35752	9.05584	7.90312	9.47108	8.60006	9.28838	8.55602	hsa-miR-433-3p	hsa-miR-642a-3p	hsa-miR-29b-2-5p	hsa-miR-29b-1-5p	hsa-miR-367-5p
ASCRP001036	5.19245e-05	2.50565	down	hsa_circRNA_100662	chr10	+	102683731	102685776	uc001krs.3	FAM178A	ACACACAAAGCAGGCTCTAAGCAGAATAAATTCCCTGAAAAAAGAA	387	319	6.33392	7.65911	428	414	386	421	358	315	368	303	327	297	337	282	6.49116	6.52419	6.36993	6.88415	6.09536	5.63874	7.9486	7.65253	7.77807	7.61807	7.69609	7.2613	hsa-miR-30d-3p	hsa-miR-890	hsa-miR-548d-5p	hsa-miR-570-5p	hsa-miR-301a-3p
ASCRP003647	2.24035e-05	5.26007	down	hsa_circRNA_103349	chr3	-	47468646	47470160	uc003crh.1	SCAP	TCTTCCAGCACTACCATGCCAATATGTGGGTGCCCCGGTGGCTTAT	399.333	532.5	6.38352	8.7786	397	417	373	332	407	470	830	552	618	402	436	357	5.95319	6.5692	6.1632	5.78109	6.64503	7.1894	9.64948	8.98275	9.15924	8.37449	8.48582	8.01981	hsa-miR-214-3p	hsa-miR-761	hsa-miR-7-5p	hsa-miR-424-5p	hsa-miR-15b-5p
ASCRP001983	0.000324257	3.55317	down	hsa_circRNA_101634	chr15	-	88669501	88670457	uc002bme.2	NTRK3	AAATTTGGAATGAAGGTTGACGAAGTGAGTCCCACACCTCCTATCA	422.5	425.5	6.57872	8.40783	365	425	375	412	443	515	378	364	386	440	480	505	5.2771	6.68531	6.19718	6.82653	7.00139	7.48481	8.01494	8.10917	8.19905	8.56779	8.70908	8.84692	hsa-miR-424-5p	hsa-miR-602	hsa-miR-186-3p	hsa-miR-16-5p	hsa-miR-214-3p
ASCRP001030	5.33283e-05	2.09565	down	hsa_circRNA_100656	chr10	-	99196947	99197507	uc009xvp.1	EXOSC1	AGTGAGTCAGGTTGAAATTTATAAGAGTTTCCGCCCAGGTGACATT	561.833	518.667	7.76169	8.82909	560	521	546	502	579	663	525	404	539	527	624	493	7.51174	7.55234	7.89506	7.46555	8.02028	8.12519	8.79887	8.36212	8.96012	8.90664	9.15471	8.79211	hsa-miR-876-3p	hsa-miR-196b-5p	hsa-miR-196a-5p	hsa-let-7b-5p	hsa-let-7f-5p
ASCRP000557	0.000824313	2.05149	down	hsa_circRNA_100168	chr1	-	35944566	35944813	uc010ohw.2	KIAA0319L	ACCTCAGCACCATACCCAGGTCCACAAGGCGATTACAATTTCCAGT	554.167	498.333	7.69261	8.72928	584	498	484	505	646	608	419	612	443	543	406	567	7.64595	7.38189	7.40867	7.48615	8.33315	7.89985	8.29193	9.18456	8.5573	8.97668	8.307	9.05821	hsa-miR-637	hsa-miR-518c-5p	hsa-miR-17-3p	hsa-miR-205-3p	hsa-miR-875-3p
ASCRP001431	0.0447387	2.27467	down	hsa_circRNA_101063	chr12	-	51467605	51470430	uc001rxu.2	CSRNP2	AGAAAATGAAGAATCCTAATGTACCTGGCTAGCTGGTGGTGAGTAG	495	395.167	7.04907	8.23472	348	451	400	521	598	652	348	313	434	411	464	401	4.92142	7.00514	6.56349	7.58213	8.1372	8.08502	7.79305	7.73977	8.49585	8.42573	8.63314	8.32079	hsa-miR-612	hsa-miR-485-5p	hsa-miR-571	hsa-miR-212-5p	hsa-miR-764
ASCRP002489	0.000509428	2.3176	down	hsa_circRNA_102157	chr17	+	60613530	60642498	uc002izx.4	TLK2	AATCTTATCAACGACGAGTAGAACAGCCCCTCTATGGTTTAGATGG	739.5	790.5	8.37996	9.5926	775	539	661	623	1109	730	888	670	779	769	850	787	8.36139	7.6351	8.50944	8.06832	9.36513	8.3404	9.79671	9.36386	9.57009	9.5655	9.63715	9.62228	hsa-miR-19a-5p	hsa-miR-452-5p	hsa-miR-19b-2-5p	hsa-miR-19b-1-5p	hsa-miR-26a-2-3p
ASCRP003803	2.20036e-06	2.04039	down	hsa_circRNA_103505	chr3	-	169863210	169863309	uc003fgm.2	PHC3	TGTCAGTCTGCAGCTACTCAGCTGATTTTCACACCCGCTACCACTG	740	755	8.47573	9.50458	777	790	700	624	774	775	705	710	785	752	882	696	8.37159	8.58057	8.6497	8.07346	8.69275	8.48633	9.35938	9.47649	9.57656	9.52413	9.7021	9.38882	hsa-miR-206	hsa-let-7g-3p	hsa-let-7a-2-3p	hsa-miR-1-3p	hsa-miR-761
ASCRP001383	7.14826e-05	3.43789	down	hsa_circRNA_101013	chr12	+	12022357	12022903	uc001raa.1	ETV6	TTGGGAGAATAGCAGATAACTGTGTCCAGAGGACCCCCAGGCCATC	388.667	362.667	6.24078	8.0223	376	361	412	369	381	433	325	309	389	360	430	363	5.53106	5.51275	6.71822	6.393	6.38727	6.90235	7.57616	7.71223	8.21492	8.10612	8.45583	8.06855	hsa-miR-619-3p	hsa-miR-185-3p	hsa-miR-328-5p	hsa-miR-612	hsa-miR-762
ASCRP002304	7.69637e-06	4.27225	down	hsa_circRNA_101964	chr17	-	5314022	5320002	uc010cle.2	NUP88	AGTACTCAATAAAGGAGATTGCTTTGCATAAATCCACCCCTGTTTG	371.5	372.167	5.99847	8.09347	374	352	371	332	413	387	350	326	388	369	443	357	5.49153	5.35554	6.12839	5.78109	6.70618	6.5281	7.80761	7.84155	8.20884	8.16091	8.52208	8.01981	hsa-miR-221-3p	hsa-miR-302a-3p	hsa-miR-373-3p	hsa-miR-302b-3p	hsa-miR-372-3p
ASCRP002222	0.000312827	3.10274	down	hsa_circRNA_101880	chr16	-	74982416	74990508	uc002fdi.3	WDR59	ACTGTCTGCTGTTGCCGCAGATTCTTATACATCGTCAATCTAGATG	448.833	439	6.86406	8.4976	428	370	445	419	499	532	434	424	400	391	467	518	6.49116	5.68154	7.07546	6.86932	7.48414	7.58276	8.39392	8.45309	8.28982	8.29212	8.6494	8.90726	hsa-miR-599	hsa-miR-138-5p	hsa-miR-484	hsa-miR-301a-3p	hsa-miR-665
ASCRP000115	5.79513e-05	2.24881	down	hsa_circRNA_000776	chrX	+	73072005	73072154			TAAAAAAGAATTAAAAGGCAGATATCCGTCACCCCGATGGGCCAGA	673	717.833	8.24861	9.41777	631	640	722	655	760	630	822	727	794	707	721	536	7.85823	8.08414	8.7161	8.19126	8.65209	7.98986	9.63519	9.51446	9.60416	9.41723	9.37186	8.96373	hsa-miR-128-1-5p	hsa-miR-128-2-5p	hsa-miR-146a-3p	hsa-miR-93-3p	hsa-miR-503-3p
ASCRP002064	0.00921797	2.4785	down	hsa_circRNA_101717	chr16	+	16101672	16110478	uc010bvi.3	ABCC1	GGAAACCATCCACGACCCTGACTGGAATGTCACGTGGAATACCAGC	468.667	453.5	7.06851	8.37798	424	440	394	434	566	554	353	641	302	509	334	582	6.42554	6.90135	6.49116	6.97869	7.94104	7.6733	7.83024	9.27496	7.54527	8.85135	7.66266	9.10339	hsa-let-7e-5p	hsa-miR-124-3p	hsa-miR-877-5p	hsa-miR-506-3p	hsa-let-7c-5p
ASCRP000953	0.000206911	2.92143	down	hsa_circRNA_100574	chr10	+	27447477	27447615	uc009xkx.2	MASTL	TGTCTACTTGGTTGTTAAAAAAGCAGACATGATCAACAAAAATATG	379.5	336	6.25164	7.79831	431	425	405	385	331	300	330	325	351	363	369	278	6.5333	6.68531	6.64443	6.59803	5.6932	5.35554	7.63268	7.8305	7.97369	8.12433	8.02859	7.20006	hsa-miR-369-3p	hsa-miR-17-3p	hsa-miR-148b-3p	hsa-miR-492	hsa-miR-449c-3p
ASCRP003407	4.85369e-05	2.0731	down	hsa_circRNA_103103	chr20	-	61833638	61835159	uc002yeh.3	YTHDF1	TGGTGCGCAAGAGTAACAGTTACCCCTCAATGAGCGACCCCTACCT	687.167	698.167	8.2998	9.35159	635	613	684	715	784	692	663	579	687	731	841	688	7.87574	7.9856	8.59307	8.41573	8.71051	8.21815	9.25394	9.07447	9.33585	9.47396	9.61002	9.3613	hsa-miR-637	hsa-miR-608	hsa-miR-486-3p	hsa-miR-185-3p	hsa-miR-767-3p
ASCRP000709	6.9113e-07	4.03774	down	hsa_circRNA_100323	chr1	-	147131074	147131890	uc001epr.2	ACP6	CAGAAAGAAGGTAGAGTGGAACCCCCAGCTATTAGAGGTCCCACCC	440.667	521	6.85116	8.86471	411	412	414	473	470	464	517	506	512	518	562	511	6.19882	6.49116	6.74985	7.27339	7.25462	7.13911	8.77217	8.80668	8.86328	8.88556	8.98097	8.87958	hsa-miR-545-3p	hsa-miR-134-5p	hsa-miR-660-3p	hsa-miR-509-3p	hsa-miR-629-3p
ASCRP002105	0.0052367	2.5712	down	hsa_circRNA_101759	chr16	-	23540822	23541218	uc002dls.4	EARS2	AAGGTGGATGTGATTGCCAAGCGTGTGCTGGGACTGCACCTCCAGC	495.333	481.667	7.20668	8.56912	486	549	368	427	477	665	352	499	349	465	465	760	7.09142	7.69435	6.07767	6.93416	7.31022	8.13228	7.82203	8.773	7.95733	8.67962	8.63828	9.54448	hsa-miR-1301-3p	hsa-miR-19b-1-5p	hsa-miR-339-5p	hsa-miR-19b-2-5p	hsa-miR-149-5p
ASCRP003088	0.000395462	4.54025	down	hsa_circRNA_102777	chr2	+	86433228	86434450	uc002srf.4	MRPL35	GAGGAGAAAGGAATCCTACGGCCCCTGAATATTTTGGCATCTTCAA	373.333	370.5	5.88134	8.06411	360	344	309	363	446	418	357	292	429	373	448	324	5.17208	5.17208	4.81893	6.31361	7.02835	6.78298	7.85901	7.56445	8.47065	8.18982	8.55506	7.74566	hsa-miR-576-3p	hsa-miR-582-3p	hsa-miR-514a-3p	hsa-miR-766-5p	hsa-miR-588
ASCRP003461	0.000139816	2.18157	down	hsa_circRNA_103160	chr22	-	19462590	19463125	uc010grq.2	UFD1L	GACCAACTCATTCTCTTTCAACATGTTCGACCACCCTATTCCCAGG	1166	1487.17	9.44364	10.569	889	1151	944	1184	1218	1610	1285	1356	1588	1575	1744	1375	8.73259	9.59424	9.23022	9.5655	9.50291	10.0364	10.3563	10.4705	10.6527	10.6556	10.7936	10.4853	hsa-miR-147a	hsa-miR-503-5p	hsa-miR-885-3p	hsa-miR-370-3p	hsa-miR-215-3p
ASCRP003058	3.67444e-06	2.255	down	hsa_circRNA_102746	chr2	+	65228581	65237897	uc010ypz.2	SLC1A4	GTGTCCTGGATTATGTGAAACCTGTTTCCCTCCAATCTTGTGGTTG	13690	22316.5	13.5282	14.7014	11993	11620	12558	13518	15676	16775	21041	27320	17651	26619	18646	22622	13.3445	13.2967	13.3572	13.5739	13.6864	13.9106	14.4198	14.7884	14.5209	14.9675	14.6838	14.8277	hsa-miR-767-5p	hsa-miR-181c-3p	hsa-miR-558	hsa-miR-634	hsa-miR-29a-3p
ASCRP003906	0.000655549	3.12915	down	hsa_circRNA_103611	chr4	-	22403053	22440043	uc003gqm.1	GPR125	TCTGCCAAGCATGCCCTAACCATTTCTAATATTCAGGCTGGATCTA	385.667	333.333	6.15306	7.79884	375	331	399	363	432	414	334	325	353	319	380	289	5.51011	4.90145	6.55328	6.31361	6.89176	6.74817	7.67094	7.8305	7.98986	7.81751	8.13292	7.35129	hsa-miR-485-5p	hsa-miR-140-3p	hsa-miR-452-3p	hsa-miR-23a-3p	hsa-miR-101-3p
ASCRP004329	0.00142235	2.27014	down	hsa_circRNA_104055	chr6	+	7176887	7189555	uc010jnw.3	RREB1	ATGGGAACATGCACAGGTTGCTCCGACTGTGTGTTCCAGGAGTGGT	725.5	794.5	8.37144	9.55422	561	668	627	865	926	706	562	637	767	851	967	983	7.517	8.21127	8.35259	8.84339	9.04723	8.25718	8.94532	9.266	9.54448	9.72487	9.86901	9.97567	hsa-miR-637	hsa-miR-328-5p	hsa-miR-623	hsa-miR-377-3p	hsa-miR-185-3p
ASCRP001209	0.000127868	3.24237	down	hsa_circRNA_100835	chr11	-	62459847	62460269	uc001nup.3	BSCL2	CTGGGCTCAGGTGATGCTGCATTACCGCTCAGACCTGCTCCAGATG	394.667	367.833	6.34328	8.04033	381	397	395	339	471	385	312	328	383	398	448	338	5.64356	6.23439	6.50578	5.8998	7.26247	6.5137	7.44741	7.86185	8.17596	8.33315	8.55506	7.86855	hsa-miR-646	hsa-miR-199b-5p	hsa-let-7g-5p	hsa-let-7e-5p	hsa-miR-658

## Sheet: Sheet2
ID	adj.P.Val	P.Value	t	B	logFC	miRNA_ID_LIST
10995	0.000302	7.08e-05	-4.42365	1.33692	-2.15675	hsa-miR-199a-3p/hsa-miR-199b-3p
30787	0.000158	2.98e-05	-4.69867	2.16841	-1.98925	hsa-miR-125b-5p
29562	9.4e-06	7.61e-07	-5.83462	5.71605	-1.9549	hsa-miR-199a-5p
11024	5.43e-05	7.46e-06	-5.1315	3.50374	-1.88165	hsa-miR-223-3p
10990	4.96e-06	3.21e-07	-6.09955	6.55623	-1.84665	hsa-miR-196a-5p
46483	0.000426	0.000111	-4.27772	0.90251	-1.82315	hsa-miR-27a-3p
169330	0.000219	4.69e-05	-4.55461	1.73094	-1.7481	hsa-miR-23b-3p
147506	8.56e-05	1.35e-05	-4.94642	2.92933	-1.74065	hsa-miR-21-5p
145943	0.000671	0.000196	-4.09338	0.36155	-1.7058	hsa-miR-100-5p
145845	0.0004	0.000102	-4.30732	0.99021	-1.6848	hsa-miR-20a-5p
42744	4.99e-08	5.12e-10	-8.09824	12.8213	-1.6759	hsa-miR-23a-3p
10916	0.00572	0.00269	-3.19657	-2.10774	-1.6699	hsa-miR-1
11014	4.58e-07	1.22e-08	-7.10394	9.73489	-1.6432	hsa-miR-214-3p
13485	0.00013	2.32e-05	-4.77703	2.40798	-1.6371	hsa-miR-10a-5p
145914	7.07e-05	1.03e-05	-5.03037	3.18932	-1.6218	hsa-miR-135b-5p
42708	0.00277	0.00111	-3.51104	-1.27734	-1.60425	hsa-miR-99a-5p
42640	0.00109	0.000364	-3.88931	-0.22587	-1.5978	hsa-miR-20b-5p
19591	0.000924	0.00029	-3.96413	-0.01201	-1.58665	hsa-miR-199b-5p
10925	0.000105	1.82e-05	-4.853	2.64126	-1.5553	hsa-miR-10b-5p
147199	0.000111	1.94e-05	-4.83296	2.57962	-1.5312	hsa-miR-27b-3p
4610	0.00826	0.00407	-3.04461	-2.49259	-1.51835	hsa-miR-126-3p
10138	0.00127	0.000441	-3.82481	-0.40877	-1.51825	hsa-miR-130a-3p
10947	0.00568	0.00266	-3.20095	-2.09648	-1.5088	hsa-miR-142-3p
147616	6.49e-08	1.12e-09	-7.85171	12.0644	-1.49555	hsa-miR-4291
17506	4.93e-05	6.12e-06	-5.19304	3.69565	-1.4939	hsa-miR-24-3p
147162	0.0112	0.00589	-2.9063	-2.83266	-1.48995	hsa-let-7a-5p
42641	0.00175	0.000659	-3.68939	-0.78814	-1.483	hsa-miR-145-5p
169336	0.000188	3.83e-05	-4.61906	1.92616	-1.48005	hsa-miR-17-5p
46467	0.000272	6.05e-05	-4.47356	1.48665	-1.47935	hsa-miR-143-5p
17752	0.00325	0.00136	-3.43878	-1.47196	-1.47695	hsa-let-7f-5p
147771	0.00308	0.00128	-3.4606	-1.41342	-1.45485	hsa-miR-4328
168980	0.00019	3.9e-05	-4.61325	1.90852	-1.42875	hsa-miR-4324
31867	0.00115	0.000388	-3.86752	-0.28783	-1.4278	hsa-miR-145-3p
13177	0.012	0.00639	-2.87531	-2.90745	-1.4245	hsa-miR-143-3p
11181	0.000408	0.000106	-4.29402	0.95077	-1.42215	hsa-miR-95
145889	1.76e-05	1.61e-06	-5.60549	4.99132	-1.3817	hsa-miR-196b-5p
148217	6.71e-05	9.5e-06	-5.05659	3.27071	-1.37485	hsa-miR-23c
11182	0.0015	0.000544	-3.75393	-0.60813	-1.3647	hsa-miR-98-5p
46801	8.56e-05	1.36e-05	-4.94467	2.92393	-1.3585	hsa-miR-106a-5p
33596	0.00597	0.00283	-3.17765	-2.15627	-1.35535	hsa-miR-126-5p
9938	4.9e-05	5.99e-06	-5.19957	3.71603	-1.35135	hsa-let-7i-5p
145844	0.0091	0.00463	-2.99697	-2.61085	-1.3449	hsa-miR-374a-5p
169129	0.0184	0.0105	-2.68446	-3.35618	-1.34255	hsa-miR-4284
145822	5.73e-06	3.88e-07	-6.04132	6.37142	-1.34045	hsa-miR-214-5p
147776	1.87e-05	1.79e-06	-5.57314	4.88923	-1.3077	hsa-miR-4317
13148	0.0253	0.0152	-2.53517	-3.69222	-1.2995	hsa-miR-195-5p
147673	4.35e-06	2.72e-07	-6.14972	6.71546	-1.29615	hsa-miR-4262
30687	2.11e-06	1.12e-07	-6.42097	7.57632	-1.2741	hsa-miR-93-5p
4700	0.00585	0.00277	-3.18529	-2.1367	-1.25455	hsa-miR-140-5p
10986	0.000316	7.51e-05	-4.40466	1.2801	-1.2192	hsa-miR-193a-3p
148430	0.00144	0.000512	-3.77463	-0.5501	-1.20905	hsa-miR-374c-5p
10972	1.79e-08	4.19e-11	-8.90515	15.2515	-1.20595	hsa-miR-181b-5p
168995	8.72e-05	1.39e-05	-4.93687	2.89982	-1.1992	hsa-miR-4791
10967	0.0385	0.024	-2.34411	-4.10174	-1.19915	hsa-miR-16-5p
145670	8.08e-05	1.23e-05	-4.975	3.01773	-1.1835	hsa-miR-18b-5p
145968	0.00131	0.000458	-3.81203	-0.44486	-1.1829	hsa-let-7d-5p
146049	0.000302	7.13e-05	-4.42122	1.32965	-1.1807	hsa-miR-28-5p
42887	9.39e-08	1.73e-09	-7.7129	11.6356	-1.17655	hsa-miR-331-3p
11018	0.00138	0.000484	-3.79375	-0.49636	-1.1708	hsa-miR-218-5p
46438	0.0107	0.00554	-2.92959	-2.77609	-1.16625	hsa-let-7g-5p
146008	0.0384	0.024	-2.3453	-4.09925	-1.16125	hsa-miR-26b-5p
11065	5.24e-05	6.89e-06	-5.15629	3.58099	-1.161	hsa-miR-335-5p
147195	5.69e-05	7.94e-06	-5.11239	3.44422	-1.1581	hsa-miR-18a-5p
145693	1.95e-06	8.67e-08	-6.50041	7.82826	-1.1539	hsa-miR-92a-3p
42865	6.49e-08	1.02e-09	-7.88025	12.1523	-1.15225	hsa-miR-181a-5p
13143	8.56e-05	1.36e-05	-4.9446	2.92371	-1.13955	hsa-miR-301a-3p
28950	5.24e-05	7.1e-06	-5.14702	3.5521	-1.13355	hsa-miR-455-3p
145746	3.56e-05	4.09e-06	-5.31758	4.08531	-1.1308	hsa-let-7i-3p
168642	0.000417	0.000109	-4.28609	0.92728	-1.1205	hsa-miR-642b-3p
169022	4.04e-05	4.77e-06	-5.27022	3.93696	-1.12	hsa-miR-4797-5p
29190	0.000293	6.78e-05	-4.4375	1.37841	-1.1161	hsa-miR-708-5p
27720	0.005	0.00228	-3.25565	-1.95512	-1.10745	hsa-miR-15a-5p
46944	0.0196	0.0113	-2.65503	-3.42351	-1.10515	hsa-miR-1297
10997	0.00178	0.000676	-3.68035	-0.81321	-1.0951	hsa-miR-19a-3p
11260	0.000289	6.59e-05	-4.44651	1.40543	-1.0909	hsa-miR-151a-5p
10919	7.39e-05	1.09e-05	-5.01336	3.13656	-1.0812	hsa-miR-103a-3p
42829	5.24e-05	7.01e-06	-5.15121	3.56514	-1.0754	hsa-miR-127-3p
11184	9.41e-05	1.58e-05	-4.89759	2.77861	-1.0711	hsa-miR-99b-5p
11091	0.000123	2.18e-05	-4.79765	2.4712	-1.0685	hsa-miR-377-3p
42524	4.35e-06	2.71e-07	-6.15075	6.71874	-1.0627	hsa-miR-21-3p
147891	8.46e-06	6.68e-07	-5.87456	5.84258	-1.0534	hsa-miR-3175
146137	0.0071	0.00344	-3.10697	-2.33605	-1.0509	hsa-miR-133a
168783	0.000401	0.000102	-4.3048	0.98273	-1.04695	hsa-miR-4770
32884	0.00139	0.00049	-3.78965	-0.50789	-1.0393	hsa-miR-342-3p
19582	8.88e-05	1.43e-05	-4.92922	2.8762	-1.03365	hsa-miR-106b-5p
17888	0.000133	2.4e-05	-4.76688	2.37688	-1.0297	hsa-let-7a-3p
169408	4.88e-07	1.45e-08	-7.05056	9.56697	-1.02855	hsa-miR-181d
168871	0.00031	7.34e-05	-4.41181	1.30148	-1.0133	hsa-miR-151a-5p/hsa-miR-151b
11053	0.0112	0.00589	-2.90669	-2.83171	-1.01255	hsa-miR-32-5p
148620	0.000132	2.36e-05	-4.77194	2.39237	-1.0083	hsa-miR-454-3p
148098	0.00206	0.000794	-3.62567	-0.96433	-1.00765	hsa-miR-374b-5p
145933	0.000479	0.000134	4.21664	0.72226	1.0006	hsa-miR-652-5p
147919	0.00139	0.000494	3.78683	-0.51582	1.00195	kshv-miR-K12-12-3p
168739	6.49e-08	1.13e-09	7.84712	12.0502	1.01665	hsa-miR-1269b
145768	2.76e-05	2.86e-06	5.42848	4.43352	1.04775	hsa-miR-665
46918	0.00684	0.0033	3.12219	-2.29753	1.06525	hsa-miR-375
168941	1.77e-05	1.64e-06	5.59972	4.97312	1.06575	hsa-miR-4501
147767	2.7e-08	1.94e-10	8.40929	13.767	1.08415	hsa-miR-4279
42696	0.000135	2.45e-05	4.7602	2.35644	1.09755	hsa-miR-943
10955	9.32e-05	1.52e-05	4.90921	2.81445	1.1978	hsa-miR-148a-3p
169082	0.00105	0.000348	3.90418	-0.18352	1.20965	hsa-miR-1275
169282	1.79e-08	8.88e-11	8.66078	14.5236	1.2741	hsa-miR-4290
147942	1.79e-08	9.13e-11	8.65179	14.4967	1.2915	hsa-miR-4268
27961	5.9e-08	7.27e-10	7.98733	12.4815	1.2999	hsa-miR-891a
168776	0.00016	3.07e-05	4.68965	2.14089	1.32	hsa-miR-4795-3p
46381	2.85e-05	2.99e-06	5.41475	4.39037	1.3332	hsa-miR-1298
169375	5.66e-07	1.74e-08	6.99472	9.39116	1.34425	hsa-miR-660-3p
168729	1.95e-06	9.18e-08	6.48277	7.77231	1.37635	hsa-miR-4661-5p
168625	1.15e-07	2.36e-09	7.61674	11.3375	1.4428	hsa-miR-4539
145633	4.27e-07	1.1e-08	7.13791	9.84163	1.5582	hsa-let-7d-3p
168942	1.98e-05	1.93e-06	5.54918	4.81365	1.6101	hsa-miR-4636
