# Supplementary material for: Identification of Gastric Cancer-Related Circular RNA through Microarray Analysis and Bioinformatics Analysis
Source: Biomed Res Int. 2018 Mar 18;2018:2381680. doi: 10.1155/2018/2381680 (PMC5878900; doi:10.1155/2018/2381680)
Supplement: Supplementary Materials — Table S1: differentially expressed circRNAs between tumor and normal tissues. Table S2: differentially expressed miRNAs between tumor and normal tissues. [file 2381680.f1.zip › New folder/Table S2.xlsx]

## Sheet: Sheet1
ID	adj.P.Val	P.Value	t	B	logFC	miRNA_ID_LIST
10995	0.000302	7.08e-05	-4.42365	1.33692	-2.15675	hsa-miR-199a-3p/hsa-miR-199b-3p
30787	0.000158	2.98e-05	-4.69867	2.16841	-1.98925	hsa-miR-125b-5p
29562	9.4e-06	7.61e-07	-5.83462	5.71605	-1.9549	hsa-miR-199a-5p
11024	5.43e-05	7.46e-06	-5.1315	3.50374	-1.88165	hsa-miR-223-3p
10990	4.96e-06	3.21e-07	-6.09955	6.55623	-1.84665	hsa-miR-196a-5p
46483	0.000426	0.000111	-4.27772	0.90251	-1.82315	hsa-miR-27a-3p
169330	0.000219	4.69e-05	-4.55461	1.73094	-1.7481	hsa-miR-23b-3p
147506	8.56e-05	1.35e-05	-4.94642	2.92933	-1.74065	hsa-miR-21-5p
145943	0.000671	0.000196	-4.09338	0.36155	-1.7058	hsa-miR-100-5p
145845	0.0004	0.000102	-4.30732	0.99021	-1.6848	hsa-miR-20a-5p
42744	4.99e-08	5.12e-10	-8.09824	12.8213	-1.6759	hsa-miR-23a-3p
10916	0.00572	0.00269	-3.19657	-2.10774	-1.6699	hsa-miR-1
11014	4.58e-07	1.22e-08	-7.10394	9.73489	-1.6432	hsa-miR-214-3p
13485	0.00013	2.32e-05	-4.77703	2.40798	-1.6371	hsa-miR-10a-5p
145914	7.07e-05	1.03e-05	-5.03037	3.18932	-1.6218	hsa-miR-135b-5p
42708	0.00277	0.00111	-3.51104	-1.27734	-1.60425	hsa-miR-99a-5p
42640	0.00109	0.000364	-3.88931	-0.22587	-1.5978	hsa-miR-20b-5p
19591	0.000924	0.00029	-3.96413	-0.01201	-1.58665	hsa-miR-199b-5p
10925	0.000105	1.82e-05	-4.853	2.64126	-1.5553	hsa-miR-10b-5p
147199	0.000111	1.94e-05	-4.83296	2.57962	-1.5312	hsa-miR-27b-3p
4610	0.00826	0.00407	-3.04461	-2.49259	-1.51835	hsa-miR-126-3p
10138	0.00127	0.000441	-3.82481	-0.40877	-1.51825	hsa-miR-130a-3p
10947	0.00568	0.00266	-3.20095	-2.09648	-1.5088	hsa-miR-142-3p
147616	6.49e-08	1.12e-09	-7.85171	12.0644	-1.49555	hsa-miR-4291
17506	4.93e-05	6.12e-06	-5.19304	3.69565	-1.4939	hsa-miR-24-3p
147162	0.0112	0.00589	-2.9063	-2.83266	-1.48995	hsa-let-7a-5p
42641	0.00175	0.000659	-3.68939	-0.78814	-1.483	hsa-miR-145-5p
169336	0.000188	3.83e-05	-4.61906	1.92616	-1.48005	hsa-miR-17-5p
46467	0.000272	6.05e-05	-4.47356	1.48665	-1.47935	hsa-miR-143-5p
17752	0.00325	0.00136	-3.43878	-1.47196	-1.47695	hsa-let-7f-5p
147771	0.00308	0.00128	-3.4606	-1.41342	-1.45485	hsa-miR-4328
168980	0.00019	3.9e-05	-4.61325	1.90852	-1.42875	hsa-miR-4324
31867	0.00115	0.000388	-3.86752	-0.28783	-1.4278	hsa-miR-145-3p
13177	0.012	0.00639	-2.87531	-2.90745	-1.4245	hsa-miR-143-3p
11181	0.000408	0.000106	-4.29402	0.95077	-1.42215	hsa-miR-95
145889	1.76e-05	1.61e-06	-5.60549	4.99132	-1.3817	hsa-miR-196b-5p
148217	6.71e-05	9.5e-06	-5.05659	3.27071	-1.37485	hsa-miR-23c
11182	0.0015	0.000544	-3.75393	-0.60813	-1.3647	hsa-miR-98-5p
46801	8.56e-05	1.36e-05	-4.94467	2.92393	-1.3585	hsa-miR-106a-5p
33596	0.00597	0.00283	-3.17765	-2.15627	-1.35535	hsa-miR-126-5p
9938	4.9e-05	5.99e-06	-5.19957	3.71603	-1.35135	hsa-let-7i-5p
145844	0.0091	0.00463	-2.99697	-2.61085	-1.3449	hsa-miR-374a-5p
169129	0.0184	0.0105	-2.68446	-3.35618	-1.34255	hsa-miR-4284
145822	5.73e-06	3.88e-07	-6.04132	6.37142	-1.34045	hsa-miR-214-5p
147776	1.87e-05	1.79e-06	-5.57314	4.88923	-1.3077	hsa-miR-4317
13148	0.0253	0.0152	-2.53517	-3.69222	-1.2995	hsa-miR-195-5p
147673	4.35e-06	2.72e-07	-6.14972	6.71546	-1.29615	hsa-miR-4262
30687	2.11e-06	1.12e-07	-6.42097	7.57632	-1.2741	hsa-miR-93-5p
4700	0.00585	0.00277	-3.18529	-2.1367	-1.25455	hsa-miR-140-5p
10986	0.000316	7.51e-05	-4.40466	1.2801	-1.2192	hsa-miR-193a-3p
148430	0.00144	0.000512	-3.77463	-0.5501	-1.20905	hsa-miR-374c-5p
10972	1.79e-08	4.19e-11	-8.90515	15.2515	-1.20595	hsa-miR-181b-5p
168995	8.72e-05	1.39e-05	-4.93687	2.89982	-1.1992	hsa-miR-4791
10967	0.0385	0.024	-2.34411	-4.10174	-1.19915	hsa-miR-16-5p
145670	8.08e-05	1.23e-05	-4.975	3.01773	-1.1835	hsa-miR-18b-5p
145968	0.00131	0.000458	-3.81203	-0.44486	-1.1829	hsa-let-7d-5p
146049	0.000302	7.13e-05	-4.42122	1.32965	-1.1807	hsa-miR-28-5p
42887	9.39e-08	1.73e-09	-7.7129	11.6356	-1.17655	hsa-miR-331-3p
11018	0.00138	0.000484	-3.79375	-0.49636	-1.1708	hsa-miR-218-5p
46438	0.0107	0.00554	-2.92959	-2.77609	-1.16625	hsa-let-7g-5p
146008	0.0384	0.024	-2.3453	-4.09925	-1.16125	hsa-miR-26b-5p
11065	5.24e-05	6.89e-06	-5.15629	3.58099	-1.161	hsa-miR-335-5p
147195	5.69e-05	7.94e-06	-5.11239	3.44422	-1.1581	hsa-miR-18a-5p
145693	1.95e-06	8.67e-08	-6.50041	7.82826	-1.1539	hsa-miR-92a-3p
42865	6.49e-08	1.02e-09	-7.88025	12.1523	-1.15225	hsa-miR-181a-5p
13143	8.56e-05	1.36e-05	-4.9446	2.92371	-1.13955	hsa-miR-301a-3p
28950	5.24e-05	7.1e-06	-5.14702	3.5521	-1.13355	hsa-miR-455-3p
145746	3.56e-05	4.09e-06	-5.31758	4.08531	-1.1308	hsa-let-7i-3p
168642	0.000417	0.000109	-4.28609	0.92728	-1.1205	hsa-miR-642b-3p
169022	4.04e-05	4.77e-06	-5.27022	3.93696	-1.12	hsa-miR-4797-5p
29190	0.000293	6.78e-05	-4.4375	1.37841	-1.1161	hsa-miR-708-5p
27720	0.005	0.00228	-3.25565	-1.95512	-1.10745	hsa-miR-15a-5p
46944	0.0196	0.0113	-2.65503	-3.42351	-1.10515	hsa-miR-1297
10997	0.00178	0.000676	-3.68035	-0.81321	-1.0951	hsa-miR-19a-3p
11260	0.000289	6.59e-05	-4.44651	1.40543	-1.0909	hsa-miR-151a-5p
10919	7.39e-05	1.09e-05	-5.01336	3.13656	-1.0812	hsa-miR-103a-3p
42829	5.24e-05	7.01e-06	-5.15121	3.56514	-1.0754	hsa-miR-127-3p
11184	9.41e-05	1.58e-05	-4.89759	2.77861	-1.0711	hsa-miR-99b-5p
11091	0.000123	2.18e-05	-4.79765	2.4712	-1.0685	hsa-miR-377-3p
42524	4.35e-06	2.71e-07	-6.15075	6.71874	-1.0627	hsa-miR-21-3p
147891	8.46e-06	6.68e-07	-5.87456	5.84258	-1.0534	hsa-miR-3175
146137	0.0071	0.00344	-3.10697	-2.33605	-1.0509	hsa-miR-133a
168783	0.000401	0.000102	-4.3048	0.98273	-1.04695	hsa-miR-4770
32884	0.00139	0.00049	-3.78965	-0.50789	-1.0393	hsa-miR-342-3p
19582	8.88e-05	1.43e-05	-4.92922	2.8762	-1.03365	hsa-miR-106b-5p
17888	0.000133	2.4e-05	-4.76688	2.37688	-1.0297	hsa-let-7a-3p
169408	4.88e-07	1.45e-08	-7.05056	9.56697	-1.02855	hsa-miR-181d
168871	0.00031	7.34e-05	-4.41181	1.30148	-1.0133	hsa-miR-151a-5p/hsa-miR-151b
11053	0.0112	0.00589	-2.90669	-2.83171	-1.01255	hsa-miR-32-5p
148620	0.000132	2.36e-05	-4.77194	2.39237	-1.0083	hsa-miR-454-3p
148098	0.00206	0.000794	-3.62567	-0.96433	-1.00765	hsa-miR-374b-5p
145933	0.000479	0.000134	4.21664	0.72226	1.0006	hsa-miR-652-5p
147919	0.00139	0.000494	3.78683	-0.51582	1.00195	kshv-miR-K12-12-3p
168739	6.49e-08	1.13e-09	7.84712	12.0502	1.01665	hsa-miR-1269b
145768	2.76e-05	2.86e-06	5.42848	4.43352	1.04775	hsa-miR-665
46918	0.00684	0.0033	3.12219	-2.29753	1.06525	hsa-miR-375
168941	1.77e-05	1.64e-06	5.59972	4.97312	1.06575	hsa-miR-4501
147767	2.7e-08	1.94e-10	8.40929	13.767	1.08415	hsa-miR-4279
42696	0.000135	2.45e-05	4.7602	2.35644	1.09755	hsa-miR-943
10955	9.32e-05	1.52e-05	4.90921	2.81445	1.1978	hsa-miR-148a-3p
169082	0.00105	0.000348	3.90418	-0.18352	1.20965	hsa-miR-1275
169282	1.79e-08	8.88e-11	8.66078	14.5236	1.2741	hsa-miR-4290
147942	1.79e-08	9.13e-11	8.65179	14.4967	1.2915	hsa-miR-4268
27961	5.9e-08	7.27e-10	7.98733	12.4815	1.2999	hsa-miR-891a
168776	0.00016	3.07e-05	4.68965	2.14089	1.32	hsa-miR-4795-3p
46381	2.85e-05	2.99e-06	5.41475	4.39037	1.3332	hsa-miR-1298
169375	5.66e-07	1.74e-08	6.99472	9.39116	1.34425	hsa-miR-660-3p
168729	1.95e-06	9.18e-08	6.48277	7.77231	1.37635	hsa-miR-4661-5p
168625	1.15e-07	2.36e-09	7.61674	11.3375	1.4428	hsa-miR-4539
145633	4.27e-07	1.1e-08	7.13791	9.84163	1.5582	hsa-let-7d-3p
168942	1.98e-05	1.93e-06	5.54918	4.81365	1.6101	hsa-miR-4636
